# Supplementary material
Source: PubMed Central journal article supplement (PMC3971454)
Supplement: mmc1.pdf [file mmc1.pdf]

## Supplemental Data

# Mapping the Human Reference Genome's Missing Sequence by Three-Way Admixture in Latino Genomes

Giulio Genovese, Robert E. Handsaker, Heng Li, Eimear E. Kenny, and Steven A. McCarroll

## Table of Contents

|                                                                             |    |
|-----------------------------------------------------------------------------|----|
| Figure S1. A rare structural polymorphism at 16p11.2. ....                  | 2  |
| Figure S2. A structural polymorphism at 21q11.2. ....                       | 3  |
| Table S1. Mapped SNPs from hs37d5. ....                                     | 4  |
| Table S2. Mapped scaffolds from hs37d5. ....                                | 78 |
| Table S3. Re-mapped CNPs. ....                                              | 89 |
| Table S4. Paralogous regions of sequence affected by the 16p11.2 CNPs. .... | 89 |
| Table S5. Regions with increased read coverage. ....                        | 90 |
| Table S6. Re-mapped SNPs. ....                                              | 97 |

**Figure S1.** A rare structural polymorphism at 16p11.2.

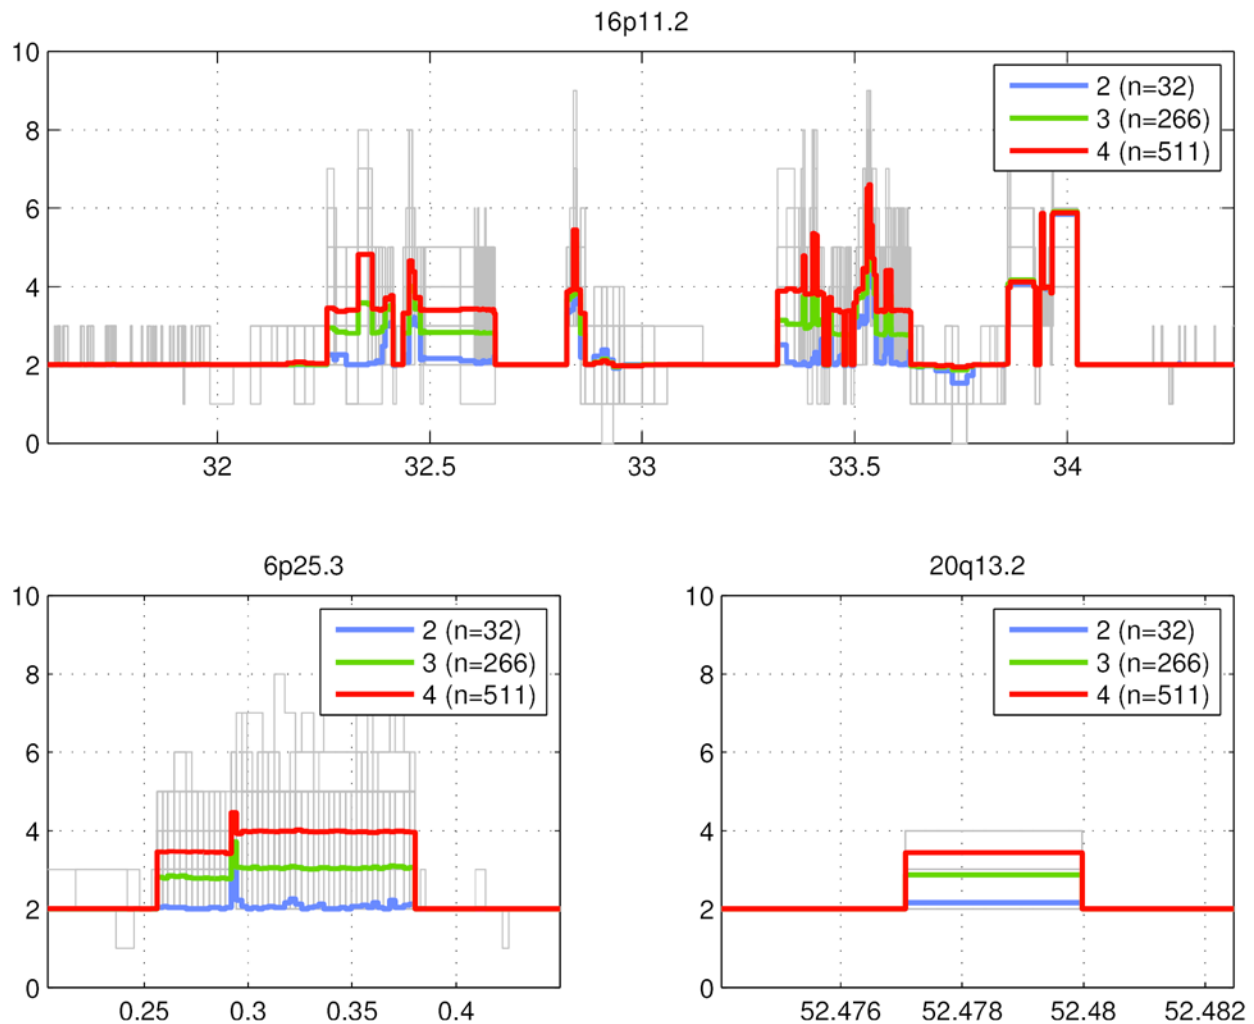

Sequence read coverage for 826 samples from the 1000 Genomes Project Phase 1 within regions 16p11.2, 6p25.3, and 20q11.2. For clarity, 42 samples which were not classified as copy number two over the two mostly unaffected windows 16:32,699,009-32,829,564 and 16:33,142,816-33,339,320 were excluded, as these may harbor larger and rarer CNVs. Median coverage for samples genotyped as CN=2,3,4 over 6:295,000-385,000 is displayed. Notably, a strong correlation emerges between coverage over the genotyped region and sequence within window 16:33,293,715 -33,723,390. Coordinates in Mbp on the horizontal axis are with respect to GRCh37.

**Figure S2.** A structural polymorphism at 21q11.2.

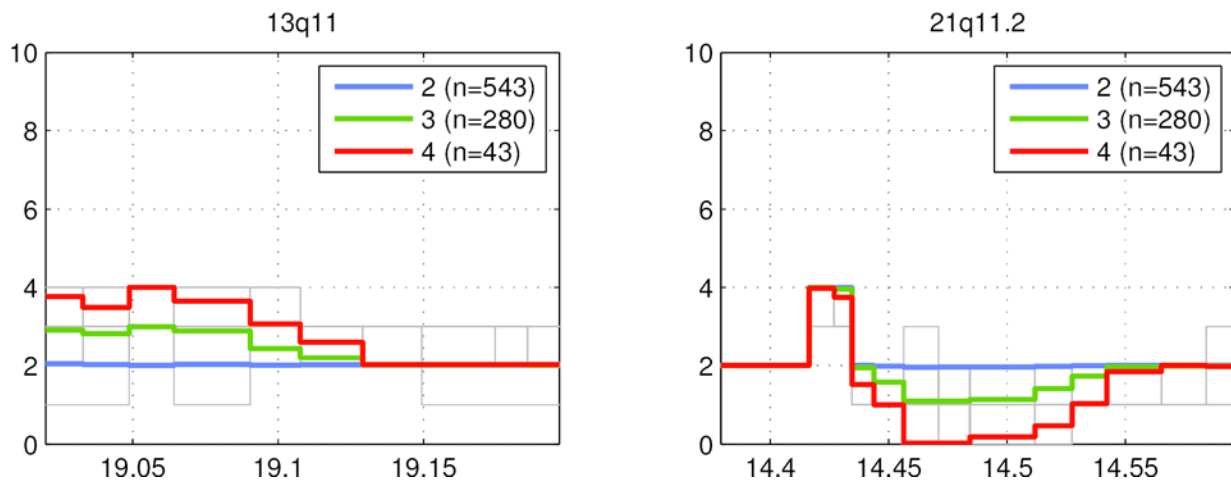

Sequence read coverage for 866 samples from the 1000 Genomes Project Phase 1 within regions 13q11 and 21q11.2. Median coverage for samples estimated as CN=2,3,4 within the 13:19,048,809-19,090,453 window is displayed. This window is contained within a recent ( $\sim 0.8\%$  divergence)  $\sim 150$  kbp segmental duplication between 13q11 and 21q11.2 (13:19,020,001-19,167,977 and 21:14,447,204-14,594,419). Notably, samples with excess coverage in the region 13q11 have a shortage of coverage in the corresponding region in 21q11.2, possibly indicating a polymorphism, known to localize on chromosome 21 through admixture mapping, involving sequence exchange between chromosome 13 and chromosome 21. Coordinates in Mbp on the horizontal axis are with respect to GRCh37.

**Table S1.** Mapped SNPs from hs37d5.

| Accession   | Position | Reference | Alternate | Mapping | LOD score |
|-------------|----------|-----------|-----------|---------|-----------|
| AL360154.30 | 90178    | C         | T         | 1q21.1  | 7.58      |
| AL360154.30 | 101317   | A         | C         | 1q21.1  | 10.47     |
| AL360154.30 | 102257   | C         | T         | 1q21.2  | 6.1       |
| AL360154.30 | 104084   | T         | C         | 1q21.2  | 7.2       |
| AL360154.30 | 105841   | A         | G         | 1q21.1  | 10.49     |
| AL360154.30 | 108915   | G         | A         | 1q21.1  | 11.74     |
| AL360154.30 | 111059   | G         | C         | 1q21.2  | 6.29      |
| AL360154.30 | 111488   | C         | T         | 1q21.2  | 6.31      |
| AL360154.30 | 111995   | C         | T         | 1q21.1  | 6.06      |
| AL360154.30 | 114477   | G         | T         | 1q21.2  | 6.42      |
| AL360154.30 | 115082   | A         | T         | 1q21.1  | 13.59     |
| AL360154.30 | 121717   | G         | A         | 1q21.1  | 6.05      |
| AL360154.30 | 123901   | C         | A         | 1q21.1  | 7.22      |
| AL360154.30 | 123920   | A         | T         | 1q21.1  | 12.94     |
| AL360154.30 | 124695   | G         | A         | 1q21.2  | 6.91      |
| AL360154.30 | 127179   | A         | C         | 1q21.3  | 10.28     |
| AL360154.30 | 127189   | A         | G         | 1q21.1  | 9.12      |
| AL360154.30 | 129287   | A         | G         | 1q21.1  | 8.17      |
| AL360154.30 | 132866   | T         | C         | 1q21.1  | 9.34      |
| AL360154.30 | 135446   | C         | T         | 1q21.2  | 6.27      |
| AL360154.30 | 135478   | T         | C         | 1q21.2  | 8.23      |
| AL360154.30 | 135551   | A         | G         | 1q21.2  | 9.08      |
| AL360154.30 | 136944   | G         | A         | 1q21.1  | 7.33      |
| AL360154.30 | 139406   | T         | C         | 1q21.3  | 6.5       |
| AL360154.30 | 141316   | G         | A         | 1p11.2  | 7.74      |
| AL360154.30 | 145271   | A         | G         | 1q21.2  | 6.96      |
| AL360154.30 | 153660   | G         | A         | 1q21.2  | 8.36      |
| AL360154.30 | 153667   | A         | T         | 1q21.2  | 8.2       |
| AL360154.30 | 161680   | C         | T         | 1q21.2  | 6.39      |
| AL360154.30 | 165097   | C         | T         | 1q21.2  | 6.92      |
| AL360154.30 | 166159   | C         | T         | 1q21.2  | 8.95      |
| AL360154.30 | 173688   | C         | A         | 1q21.2  | 6.31      |
| AL360154.30 | 188301   | C         | T         | 1q21.2  | 7.86      |
| AL360154.30 | 192686   | C         | T         | 1q21.2  | 16.68     |
| AL360154.30 | 197628   | C         | T         | 1q21.2  | 8.39      |
| AL360154.30 | 198281   | T         | C         | 1q21.3  | 7.17      |
| AL360154.30 | 201440   | G         | A         | 1q21.1  | 7.99      |
| AL360154.30 | 202487   | G         | A         | 1q21.2  | 8.38      |
| AL360154.30 | 203223   | G         | A         | 1q21.2  | 14.84     |
| AL360154.30 | 210472   | G         | T         | 1q21.1  | 10.7      |
| AL360154.30 | 213831   | T         | C         | 1p12    | 7.49      |
| AL360154.30 | 213904   | T         | C         | 1q21.1  | 10.08     |
| AL360154.30 | 216233   | A         | T         | 1q21.1  | 13.33     |
| AL360154.30 | 217228   | A         | C         | 1q21.2  | 12.21     |
| AL360154.30 | 227103   | C         | A         | 1q21.1  | 9.1       |
| AC109135.2  | 108586   | A         | G         | 1q21.1  | 13.78     |
| AC109135.2  | 106788   | T         | C         | 1q21.1  | 6.66      |
| AC109135.2  | 81870    | A         | G         | 1q21.2  | 7.46      |

|             |        |   |     |          |       |
|-------------|--------|---|-----|----------|-------|
| AC109135.2  | 30946  | C | T   | 1q21.2   | 7.04  |
| AC109135.2  | 27870  | A | G   | 1q21.1   | 7.01  |
| AC109135.2  | 17565  | T | C   | 1q21.2   | 6.57  |
| AC109135.2  | 11257  | C | T   | 1q21.3   | 9.4   |
| AC109135.2  | 6700   | C | A   | 1q21.2   | 6.11  |
| AC018692.9  | 3182   | C | T   | 21q21.1  | 6.4   |
| AC018692.9  | 30855  | C | T   | 21q21.1  | 6.34  |
| AC018692.9  | 140295 | C | G   | 21q11.2  | 8.83  |
| AC145060.2  | 7994   | C | T   | 8q11.21  | 10.7  |
| AL837517.14 | 1673   | T | A   | 20p11.21 | 7.16  |
| AL837517.14 | 1691   | G | A   | 20p11.21 | 7.5   |
| AL837517.14 | 1717   | T | C   | 20p11.21 | 7.78  |
| AL837517.14 | 55549  | A | C   | 20q11.21 | 7.8   |
| AL837517.14 | 55808  | C | A   | 20p11.21 | 6.06  |
| AL837517.14 | 55960  | G | T   | 20p11.21 | 7.76  |
| AL837517.14 | 56424  | A | G/T | 20q11.22 | 7.19  |
| AL837517.14 | 56496  | C | G/T | 20p11.21 | 7.75  |
| AL837517.14 | 56811  | A | T   | 20q11.21 | 8.25  |
| AL837517.14 | 57020  | C | T   | 20q11.21 | 7.21  |
| AL837517.14 | 57409  | G | C/T | 20p11.21 | 8.4   |
| AL837517.14 | 57423  | T | A   | 20q11.21 | 6.58  |
| AL837517.14 | 57731  | A | G   | 20q11.21 | 6.58  |
| AL837517.14 | 57780  | T | A   | 20q11.23 | 8.16  |
| AL837517.14 | 57833  | C | G   | 20p11.21 | 7.25  |
| AL837517.14 | 58119  | G | A   | 20p11.21 | 7.88  |
| AL837517.14 | 58982  | G | A   | 20p11.21 | 6.92  |
| AL837517.14 | 58987  | G | C   | 20q11.21 | 7.21  |
| AL837517.14 | 59224  | T | C   | 20p11.21 | 11.63 |
| AL837517.14 | 59315  | A | G   | 20q11.22 | 9.24  |
| AL837517.14 | 63085  | G | T   | 20p11.21 | 8.1   |
| AL837517.14 | 63252  | C | T   | 20p11.21 | 7.33  |
| AL837517.14 | 63541  | T | A   | 20p11.21 | 6.22  |
| AL837517.14 | 65807  | C | A   | 20q11.21 | 11.03 |
| AL837517.14 | 65976  | C | T   | 20p11.21 | 6     |
| AL837517.14 | 66156  | T | C   | 20q11.21 | 7.16  |
| AL837517.14 | 66159  | C | T   | 20q11.21 | 13.6  |
| AL837517.14 | 66271  | C | T   | 20q11.21 | 6.19  |
| AL837517.14 | 67320  | G | T   | 20p11.21 | 7.07  |
| AL837517.14 | 67643  | A | G   | 20q11.21 | 10.04 |
| AL837517.14 | 68082  | G | A   | 20p11.21 | 7.57  |
| AL837517.14 | 68146  | G | A   | 20p11.21 | 7.28  |
| AL837517.14 | 68520  | G | A   | 20q11.21 | 6.4   |
| AL837517.14 | 69012  | G | A   | 20q11.21 | 6.47  |
| AL837517.14 | 69837  | A | T   | 20p11.21 | 7.32  |
| AL837517.14 | 69871  | G | C   | 20q11.21 | 7.38  |
| AL837517.14 | 69991  | C | T   | 20p11.21 | 6.21  |
| AL837517.14 | 70099  | C | A   | 20q11.21 | 6.43  |
| AL837517.14 | 70554  | T | C   | 20p11.21 | 6.44  |
| AL837517.14 | 71828  | A | G   | 20q11.21 | 7.01  |
| AL837517.14 | 71991  | C | T   | 20q11.21 | 6.77  |
| AL837517.14 | 72037  | T | C   | 20q11.21 | 6.38  |
| AL837517.14 | 72470  | C | G   | 20p11.1  | 7.11  |
| AL837517.14 | 72552  | C | T   | 20q11.21 | 6.25  |

|             |       |   |     |          |       |
|-------------|-------|---|-----|----------|-------|
| AL837517.14 | 72748 | G | A   | 20q11.21 | 7.75  |
| AL837517.14 | 73400 | G | A   | 20p11.21 | 7.87  |
| AL837517.14 | 73749 | G | A   | 20p11.21 | 7.96  |
| AL837517.14 | 74583 | C | T   | 20q11.21 | 6.91  |
| AL837517.14 | 75518 | A | C   | 20p11.21 | 11.76 |
| AL837517.14 | 75843 | G | T   | 20p11.21 | 6.75  |
| AL837517.14 | 77090 | C | T   | 20q11.21 | 6.2   |
| AL837517.14 | 77666 | C | G   | 20p11.21 | 6.6   |
| AL837517.14 | 78490 | C | G   | 20p11.1  | 7.15  |
| AL837517.14 | 80504 | G | T   | 20q11.21 | 6.02  |
| AL837517.14 | 82236 | T | C   | 20p11.21 | 10.83 |
| AL837517.14 | 82662 | A | C   | 20q11.21 | 10.83 |
| AL837517.14 | 83664 | G | T   | 20q11.21 | 7.45  |
| AL837517.14 | 85151 | A | C   | 20q11.22 | 6.89  |
| AL837517.14 | 85580 | T | G   | 20q11.21 | 9.05  |
| AL837517.14 | 87846 | G | A   | 20q11.21 | 7.82  |
| AL837517.14 | 88261 | A | C   | 20q11.22 | 7.59  |
| AL837517.14 | 88514 | C | A   | 20p11.21 | 7.38  |
| AL837517.14 | 89598 | G | A   | 20p11.21 | 7.93  |
| BX088702.10 | 98506 | C | G   | 9q21.11  | 6.17  |
| AC145166.2  | 33525 | T | C   | 17p11.2  | 6.54  |
| AC145205.2  | 8995  | C | T   | 17q25.3  | 7.02  |
| AC145205.2  | 48887 | T | C   | 17q25.3  | 6.12  |
| AC145205.2  | 48988 | G | A   | 17q25.3  | 7.69  |
| AC145205.2  | 51419 | A | C/T | 17q25.3  | 7.15  |
| AC145205.2  | 52254 | A | G   | 17q25.3  | 7.97  |
| AC145205.2  | 56431 | T | C   | 17q25.3  | 6.1   |
| AC145205.2  | 61571 | A | G   | 17q25.3  | 9.88  |
| AC145205.2  | 61666 | C | T   | 17q25.3  | 10.04 |
| AC145205.2  | 64882 | A | C   | 17q25.3  | 6.69  |
| AC145205.2  | 71840 | A | G   | 17q25.3  | 6.2   |
| AC145205.2  | 75440 | G | T   | 17q25.3  | 12.02 |
| AC145205.2  | 75872 | C | T   | 17q25.3  | 12.01 |
| AC145205.2  | 75890 | C | T   | 17q25.3  | 7.58  |
| AC145205.2  | 76101 | T | C   | 17q25.3  | 7.87  |
| AC145205.2  | 76102 | C | T   | 17q25.3  | 7.08  |
| AC145205.2  | 76119 | A | G   | 17q25.3  | 6.13  |
| AC145205.2  | 76147 | G | A   | 17q25.3  | 6.74  |
| AC145205.2  | 76193 | T | C   | 17q25.3  | 6.29  |
| AC145205.2  | 77095 | G | C   | 17q25.3  | 6.6   |
| AC145205.2  | 79997 | C | T   | 17q25.3  | 9.35  |
| AC145205.2  | 80480 | T | G   | 17q25.3  | 8.6   |
| AC145205.2  | 80788 | G | A   | 17q25.3  | 10.99 |
| AC145205.2  | 80839 | T | C   | 17q25.3  | 7.79  |
| AC145209.2  | 12798 | C | G   | 17q25.3  | 7.05  |
| AC136499.2  | 422   | G | T   | 5p12     | 7.53  |
| AC136499.2  | 1838  | C | T   | 5p12     | 6.31  |
| AC136499.2  | 3320  | C | A   | 5p12     | 7.9   |
| AC136499.2  | 20826 | C | A   | 5p12     | 7.93  |
| AC136499.2  | 21604 | T | C   | 5p12     | 6.69  |
| AC136499.2  | 21614 | A | C   | 5p12     | 6.27  |
| AC136499.2  | 27389 | T | C   | 5p12     | 6.47  |
| AC136499.2  | 27392 | G | A   | 5p12     | 6.89  |

|             |        |   |     |          |      |
|-------------|--------|---|-----|----------|------|
| AC136499.2  | 27563  | G | A   | 5p12     | 7.67 |
| AC136499.2  | 36565  | T | C   | 5q11.1   | 7.03 |
| AC136499.2  | 36795  | T | A   | 5p12     | 6.49 |
| AC136499.2  | 53492  | C | T   | 5p12     | 7.47 |
| AC136499.2  | 54572  | G | A   | 5q11.1   | 6.87 |
| AC136499.2  | 69194  | G | A   | 5p12     | 6.4  |
| AC136499.2  | 70457  | C | T   | 5q11.1   | 7.05 |
| AC136499.2  | 72813  | C | A   | 5p12     | 7.22 |
| AL163540.11 | 4892   | G | A   | 9q21.12  | 6.02 |
| AL163540.11 | 8397   | C | A   | 9q21.12  | 6.87 |
| AL163540.11 | 13527  | T | C   | 9q21.12  | 6.22 |
| AL163540.11 | 16008  | T | C   | 9q21.12  | 6.5  |
| AL163540.11 | 25916  | G | C   | 9q21.12  | 6.31 |
| AL163540.11 | 42238  | C | T   | 9q21.11  | 6.06 |
| AL163540.11 | 43385  | G | A   | 9q21.11  | 7.86 |
| AL163540.11 | 43917  | G | A   | 9q21.12  | 6.19 |
| AL163540.11 | 53927  | T | G   | 9q21.11  | 8.2  |
| AL163540.11 | 68315  | A | T   | 9q21.12  | 8.02 |
| AL163540.11 | 71888  | G | C   | 9q21.12  | 6.05 |
| AL163540.11 | 80161  | C | T   | 9q21.12  | 6.98 |
| AL163540.11 | 80433  | C | T   | 9q21.12  | 7.86 |
| AL163540.11 | 83821  | T | A/C | 9p11.2   | 6    |
| AL163540.11 | 92654  | C | T   | 9q21.11  | 6.87 |
| AL163540.11 | 113640 | A | G   | 9q21.12  | 8.58 |
| AL163540.11 | 121311 | C | T   | 9q21.12  | 8.85 |
| AL163540.11 | 121619 | T | A   | 9q21.12  | 7.19 |
| AL163540.11 | 121829 | A | G   | 9q21.12  | 6.39 |
| AL163540.11 | 124349 | G | C   | 9q21.12  | 7.42 |
| AL163540.11 | 125732 | G | C/T | 9q21.12  | 7.14 |
| AL163540.11 | 125904 | A | C   | 9q21.12  | 7.85 |
| AL163540.11 | 126326 | G | T   | 9q21.12  | 8.26 |
| AL163540.11 | 126819 | A | G   | 9q21.12  | 7.26 |
| AL163540.11 | 126951 | C | A   | 9q21.12  | 7.73 |
| AL163540.11 | 127985 | T | C   | 9q21.12  | 6.62 |
| AL163540.11 | 131061 | G | C   | 9q21.12  | 8.55 |
| AL163540.11 | 131718 | G | A   | 9q21.12  | 6.36 |
| AL163540.11 | 140532 | C | A   | 9q21.12  | 6.62 |
| AL163540.11 | 146907 | A | G   | 9q21.12  | 6.77 |
| AL163540.11 | 148352 | G | C   | 9q21.12  | 7.93 |
| AL163540.11 | 153340 | A | T   | 9p13.1   | 7.24 |
| AL163540.11 | 154034 | G | C   | 9q21.12  | 6.54 |
| AL163540.11 | 158795 | C | G   | 9q21.12  | 6.92 |
| AL163540.11 | 159064 | T | C   | 9p13.1   | 6.58 |
| AL163540.11 | 160198 | C | T   | 9q21.12  | 7.48 |
| AL163540.11 | 160471 | A | G   | 9q21.12  | 7.24 |
| AL163540.11 | 160599 | G | A   | 9q21.12  | 7.59 |
| AL163540.11 | 161075 | G | C   | 9q21.12  | 7.81 |
| AL163540.11 | 164296 | A | T   | 9q21.12  | 7.32 |
| AL163540.11 | 166456 | C | A   | 9q21.12  | 7.61 |
| AL356585.7  | 9128   | G | A   | 13q12.11 | 8.13 |
| AL356585.7  | 17354  | A | T   | 13q12.11 | 7.32 |
| AL356585.7  | 27092  | A | C   | 13q12.11 | 6.62 |
| AL356585.7  | 27556  | A | G   | 13q12.11 | 6.03 |

|             |        |   |     |          |       |
|-------------|--------|---|-----|----------|-------|
| AL356585.7  | 29724  | G | C/T | 13q12.11 | 7.21  |
| AL356585.7  | 33922  | G | A   | 13q12.11 | 7.7   |
| AL356585.7  | 36207  | G | A   | 13q12.11 | 8.09  |
| AL356585.7  | 50863  | G | T   | 13q12.11 | 7.6   |
| AL356585.7  | 60245  | A | G   | 13q12.11 | 6.97  |
| AL356585.7  | 61666  | C | G   | 13q12.11 | 11.4  |
| AL356585.7  | 66696  | G | C   | 13q12.11 | 6.69  |
| AL356585.7  | 80010  | A | G   | 13q11    | 9.16  |
| AL356585.7  | 80151  | A | G   | 13q12.11 | 9.16  |
| AL356585.7  | 80165  | C | A   | 13q12.11 | 6.67  |
| AL356585.7  | 94721  | G | T   | 13q12.11 | 7.34  |
| AL356585.7  | 124865 | C | A   | 13q12.11 | 6.52  |
| AL356585.7  | 157111 | G | A   | 2p11.2   | 6.61  |
| AL356585.7  | 185305 | A | G   | 13q12.11 | 6.04  |
| BX072566.10 | 140916 | G | C   | 21q11.2  | 7.18  |
| BX546479.5  | 29914  | T | C   | 1q21.1   | 7.92  |
| BX546479.5  | 38158  | A | T   | 1p11.2   | 6.86  |
| BX546479.5  | 143370 | C | A   | 14q11.2  | 6.44  |
| AL592188.60 | 87991  | G | A   | 1p36.11  | 6.14  |
| AL590523.5  | 12818  | C | A   | 3q11.2   | 6.49  |
| AL591856.26 | 54236  | A | G   | 4q31.3   | 6.22  |
| AL929347.8  | 75722  | G | A   | 6p25.3   | 6.13  |
| AL929347.8  | 97802  | C | T   | 6p25.3   | 6.28  |
| AL929347.8  | 100512 | T | C   | 6p25.3   | 6.18  |
| AL929347.8  | 103141 | G | T   | 6p25.3   | 6.02  |
| AL929347.8  | 103787 | A | G   | 6p25.3   | 6.47  |
| CT963082.1  | 621    | C | A   | 14q11.2  | 6.22  |
| CT963082.1  | 14068  | T | C/G | 14q11.2  | 8.17  |
| CU463998.4  | 2417   | T | C   | 14q11.2  | 8.43  |
| CU463998.4  | 7751   | T | C   | 14q11.2  | 6.06  |
| CU463998.4  | 13888  | C | T   | 14q11.2  | 6.86  |
| CU463998.4  | 13907  | A | G   | 14q11.2  | 6.29  |
| CU463998.4  | 17574  | C | G   | 14q11.2  | 6.69  |
| CU463998.4  | 22241  | C | G/T | 14q11.2  | 8.02  |
| CU463998.4  | 26253  | A | C   | 14q11.2  | 6.69  |
| CU463998.4  | 26297  | C | T   | 14q11.2  | 6.08  |
| CU463998.4  | 30580  | C | A   | 14q11.2  | 6.87  |
| CU463998.4  | 37738  | G | T   | 14q11.2  | 7.16  |
| CU463998.4  | 41149  | T | A   | 14q11.2  | 6.52  |
| CU459023.3  | 894    | T | G   | 22q11.21 | 6.1   |
| CU459200.1  | 10441  | T | C   | 22q12.3  | 7.33  |
| CU459200.1  | 10594  | A | C   | 22q12.3  | 9.96  |
| CU459200.1  | 10636  | T | G   | 22q12.3  | 11.21 |
| CU459200.1  | 13499  | C | T   | 22q12.3  | 6.07  |
| CU459200.1  | 28040  | G | C   | 22q12.3  | 9.4   |
| CU459200.1  | 28098  | A | C   | 22q12.3  | 7.73  |
| CU459200.1  | 35526  | C | T   | 22q12.3  | 10.09 |
| CU459188.2  | 9892   | A | G   | 22q12.1  | 6.74  |
| GL582971.1  | 494063 | A | G   | 7q34     | 7.06  |
| GL582971.1  | 505528 | G | A   | 7q34     | 6.7   |
| GL582971.1  | 517709 | T | C   | 7q34     | 7.42  |
| GL582971.1  | 519008 | T | G   | 7q34     | 8.4   |
| GL582971.1  | 702381 | T | C   | 7q34     | 9.26  |



|            |        |   |     |      |       |
|------------|--------|---|-----|------|-------|
| GL582971.1 | 706275 | T | G   | 7q34 | 9.31  |
| GL582971.1 | 742969 | T | C   | 7q35 | 13.56 |
| GL582971.1 | 747563 | A | G   | 7q34 | 8.57  |
| GL582971.1 | 748113 | T | C   | 7q34 | 7.13  |
| GL582971.1 | 748132 | G | T   | 7q34 | 7.63  |
| GL582971.1 | 748136 | G | T   | 7q34 | 6.97  |
| GL582971.1 | 748142 | A | C   | 7q34 | 6.99  |
| GL582971.1 | 754274 | A | C   | 7q35 | 10.74 |
| GL582971.1 | 754555 | G | C   | 7q35 | 9.66  |
| GL582971.1 | 757879 | T | A   | 7q34 | 8.39  |
| GL582971.1 | 764032 | C | G   | 7q34 | 6.59  |
| GL582971.1 | 764954 | G | C   | 7q35 | 10.46 |
| GL582971.1 | 765975 | A | C   | 7q34 | 8.64  |
| GL582971.1 | 766542 | T | A   | 7q35 | 6.55  |
| GL582971.1 | 766736 | G | T   | 7q35 | 7.16  |
| GL582971.1 | 768975 | A | G   | 7q34 | 7.75  |
| GL582971.1 | 769715 | T | A   | 7q35 | 7.45  |
| GL582971.1 | 770370 | A | C   | 7q34 | 8.62  |
| GL582971.1 | 771667 | G | A   | 7q34 | 16.64 |
| GL582971.1 | 775532 | A | G   | 7q34 | 16.9  |
| GL582971.1 | 776849 | C | T   | 7q34 | 9.67  |
| GL582971.1 | 777229 | G | A   | 7q34 | 8.29  |
| GL582971.1 | 777562 | T | A   | 7q35 | 6.86  |
| GL582971.1 | 777637 | A | G   | 7q34 | 20.29 |
| GL582971.1 | 777843 | C | T   | 7q35 | 8.03  |
| GL582971.1 | 778455 | A | G   | 7q34 | 19.42 |
| GL582971.1 | 778706 | C | G   | 7q34 | 9.16  |
| GL582971.1 | 781550 | T | C/G | 7q34 | 6.35  |
| GL582971.1 | 782059 | T | G   | 7q34 | 17.34 |
| GL582971.1 | 782261 | G | A   | 7q34 | 17    |
| GL582971.1 | 782479 | G | C   | 7q35 | 7.74  |
| GL582971.1 | 785035 | G | A   | 7q34 | 11.23 |
| GL582971.1 | 786149 | T | A   | 7q34 | 11.9  |
| GL582971.1 | 786685 | A | G   | 7q35 | 7.93  |
| GL582971.1 | 786783 | C | A   | 7q34 | 6.86  |
| GL582971.1 | 788570 | T | C   | 7q34 | 18.87 |
| GL582971.1 | 790146 | T | C   | 7q34 | 19.56 |
| GL582971.1 | 790166 | C | A   | 7q34 | 8.41  |
| GL582971.1 | 790402 | C | T   | 7q34 | 20.03 |
| GL582971.1 | 790828 | A | T   | 7q34 | 6.79  |
| GL582971.1 | 791160 | T | A   | 7q34 | 10.53 |
| GL582971.1 | 791193 | G | A   | 7q34 | 7.43  |
| GL582971.1 | 792248 | T | G   | 7q34 | 14.48 |
| GL582971.1 | 793535 | T | G   | 7q34 | 21.24 |
| GL582971.1 | 794347 | A | C   | 7q34 | 12.38 |
| GL582971.1 | 794486 | T | C   | 7q35 | 8.42  |
| GL582971.1 | 795488 | T | C   | 7q34 | 12.83 |
| GL582971.1 | 795618 | C | T   | 7q34 | 13.51 |
| GL582971.1 | 795970 | G | C   | 7q34 | 8.41  |
| GL582971.1 | 796213 | A | C   | 7q35 | 8.28  |
| GL582971.1 | 796982 | G | A   | 7q34 | 12.44 |
| GL582971.1 | 798229 | A | G   | 7q34 | 17.57 |
| GL582971.1 | 798249 | C | T   | 7q34 | 7.76  |

|             |        |   |   |          |       |
|-------------|--------|---|---|----------|-------|
| GL582971.1  | 799242 | G | A | 7q34     | 6.75  |
| GL582971.1  | 799935 | A | G | 7q35     | 16.24 |
| GL582971.1  | 800854 | G | T | 7q34     | 10.58 |
| GL582971.1  | 801607 | A | G | 7q34     | 17.21 |
| GL582971.1  | 801723 | A | G | 7q34     | 17.92 |
| GL582971.1  | 801984 | C | A | 7q35     | 11.71 |
| GL383545.1  | 37564  | G | A | 10p12.1  | 8.81  |
| GL383545.1  | 75483  | C | A | 10p12.1  | 6.32  |
| GL383561.1  | 401104 | G | A | 17q11.2  | 6.23  |
| AC006359.3  | 118502 | T | G | 1p12     | 6.1   |
| AC006453.3  | 133858 | C | T | 2q11.1   | 8.66  |
| AC006453.3  | 134510 | C | T | 2q11.1   | 6.26  |
| AC006453.3  | 135959 | C | T | 2q11.2   | 6.37  |
| AC006453.3  | 137183 | A | T | 2p11.2   | 6.11  |
| AC006453.3  | 137364 | G | A | 2q11.1   | 6.42  |
| AC006453.3  | 137438 | A | T | 2q11.1   | 7.27  |
| AC006453.3  | 138550 | C | A | 2q11.1   | 7.76  |
| AC006453.3  | 140827 | T | C | 2q11.1   | 8.06  |
| AC006453.3  | 141838 | C | G | 2p11.2   | 6.69  |
| AC006453.3  | 141937 | G | T | 2p11.2   | 6.04  |
| AC006453.3  | 144206 | A | G | 2q11.2   | 8.89  |
| AC006453.3  | 144527 | T | C | 2q11.2   | 8.34  |
| AC006453.3  | 145057 | C | A | 2q11.2   | 8.39  |
| AC006453.3  | 145162 | G | A | 2q11.2   | 7.43  |
| AC006453.3  | 145957 | T | C | 2q11.1   | 6.23  |
| AC006453.3  | 148544 | C | T | 2q11.2   | 9.38  |
| AC006453.3  | 148860 | G | A | 2q11.1   | 14.03 |
| AC006453.3  | 149240 | G | A | 2q11.1   | 6.24  |
| AC006453.3  | 151083 | T | C | 2q11.2   | 6.1   |
| AC006453.3  | 154211 | C | T | 2q11.1   | 14.27 |
| AC010098.8  | 8527   | T | C | 1q21.1   | 7.12  |
| AC010098.8  | 15054  | A | C | 1q21.1   | 7.73  |
| AC010098.8  | 16509  | C | G | 1q21.1   | 6.1   |
| AC010098.8  | 18028  | G | A | 1q21.1   | 7.29  |
| AC011850.12 | 76790  | C | T | 20q11.21 | 8.89  |
| AC011850.12 | 76849  | G | T | 20q11.21 | 7.24  |
| AC011850.12 | 101702 | C | T | 20q11.22 | 7.36  |
| AC011850.12 | 148043 | C | T | 20q11.21 | 8.12  |
| AC011850.12 | 148578 | G | T | 20q11.21 | 6.36  |
| AC011850.12 | 148716 | G | C | 20p11.21 | 8.03  |
| AC018688.9  | 6512   | G | A | 20p11.21 | 6.61  |
| AC018688.9  | 12211  | C | T | 20p11.21 | 6.65  |
| AC018688.9  | 29103  | C | T | 20p11.21 | 6.53  |
| AC018688.9  | 76726  | T | G | 20p11.21 | 6.48  |
| AC018688.9  | 93504  | G | C | 20p11.21 | 6.79  |
| AC018688.9  | 109717 | A | G | 20q11.22 | 9.58  |
| AC018688.9  | 112431 | G | C | 20q11.22 | 7.15  |
| AC018688.9  | 113996 | T | C | 20q11.22 | 8.55  |
| AC018688.9  | 117512 | G | A | 20q11.22 | 6.05  |
| AC018688.9  | 133847 | C | G | 20q11.21 | 9.33  |
| AC018688.9  | 134100 | T | C | 20q11.22 | 9.72  |
| AC018688.9  | 135136 | T | C | 20q11.22 | 6.69  |
| AC018688.9  | 135329 | C | A | 20q11.21 | 9.37  |

|             |        |   |     |          |       |
|-------------|--------|---|-----|----------|-------|
| AC018688.9  | 135764 | G | T   | 20q11.21 | 6.26  |
| AC018688.9  | 165518 | T | G   | 20q11.21 | 6.32  |
| AC026131.4  | 160042 | G | A   | 10q11.21 | 6.79  |
| AC026131.4  | 161338 | A | C   | 10q11.21 | 10.4  |
| AC026131.4  | 165537 | C | A   | 10p11.21 | 6.81  |
| AC026131.4  | 165538 | C | G   | 10p11.21 | 6.57  |
| AC026131.4  | 165576 | A | C   | 10p11.21 | 10.62 |
| AC026131.4  | 165639 | G | T   | 10q11.23 | 6.23  |
| AC026131.4  | 165779 | G | A   | 10q11.21 | 8.57  |
| AC026273.7  | 3704   | C | A   | 2p11.2   | 13.24 |
| AC026273.7  | 9816   | C | T   | 2p11.2   | 8.15  |
| AC026273.7  | 10401  | C | T   | 2p11.2   | 11.04 |
| AC026273.7  | 26849  | A | G   | 2q11.2   | 9.18  |
| AC026273.7  | 35370  | G | A   | 2q11.2   | 8.66  |
| AC026273.7  | 47492  | C | T   | 2p11.2   | 12.64 |
| AC026273.7  | 55949  | G | A   | 2q11.2   | 6.23  |
| AC026273.7  | 61002  | G | T   | 2p11.2   | 8.97  |
| AC026273.7  | 79708  | G | A   | 2p11.2   | 11.67 |
| AC026273.7  | 108240 | T | A   | 2p11.2   | 8.29  |
| AC026273.7  | 112876 | G | C   | 2q11.2   | 7.76  |
| AC040978.8  | 25177  | T | C   | 8q24.3   | 6.71  |
| AC040978.8  | 25440  | T | C   | 8q24.3   | 11.2  |
| AC040978.8  | 25606  | A | G   | 8q24.3   | 11.39 |
| AC040978.8  | 26028  | A | G   | 8q24.3   | 8.05  |
| AC040978.8  | 26230  | C | T   | 8q24.3   | 11.38 |
| AC040978.8  | 26231  | A | G   | 8q24.3   | 11.92 |
| AC040978.8  | 26251  | G | A   | 8q24.3   | 6.97  |
| AC040978.8  | 26877  | C | T   | 8q24.3   | 9.53  |
| AC040978.8  | 27156  | A | G   | 8q24.3   | 11.28 |
| AC040978.8  | 27308  | T | G   | 8q24.3   | 8.38  |
| AC069213.22 | 24072  | G | T   | 3q29     | 7.86  |
| AC069213.22 | 24194  | C | G   | 3q29     | 7.72  |
| AC069213.22 | 30834  | G | A   | 3q29     | 7.35  |
| AC069213.22 | 30928  | C | G/T | 3q29     | 9.11  |
| AC069213.22 | 30929  | G | C   | 3q29     | 7.66  |
| AC069213.22 | 30935  | G | A   | 3q29     | 8.47  |
| AC069213.22 | 30942  | C | A   | 3q29     | 8.77  |
| AC069213.22 | 34872  | C | T   | 3q29     | 6.48  |
| AC069213.22 | 35431  | G | C   | 3q29     | 7.07  |
| AC069213.22 | 35492  | C | G   | 3q29     | 6.54  |
| AC069213.22 | 35495  | A | T   | 3q29     | 7.11  |
| AC069213.22 | 35619  | T | G   | 3q29     | 6.6   |
| AC069213.22 | 35697  | A | G   | 3q29     | 6.79  |
| AC069213.22 | 35857  | C | G   | 3q29     | 8.11  |
| AC069213.22 | 35926  | T | G   | 3q29     | 7.34  |
| AC069213.22 | 36081  | T | C/G | 3q29     | 8.36  |
| AC069213.22 | 36420  | A | C/G | 3q29     | 6.1   |
| AC069213.22 | 36625  | A | C   | 3q29     | 6.25  |
| AC069213.22 | 37112  | T | G   | 3q29     | 8.03  |
| AC069213.22 | 40384  | T | A   | 3q29     | 12.94 |
| AC069213.22 | 40424  | C | T   | 3q29     | 10.68 |
| AC069213.22 | 40527  | A | T   | 3q29     | 6.74  |
| AC069213.22 | 41371  | T | C   | 3q29     | 9.35  |

|             |        |   |     |          |       |
|-------------|--------|---|-----|----------|-------|
| AC069213.22 | 45826  | T | G   | 3q29     | 9.06  |
| AC079801.2  | 3025   | A | T   | 21q11.2  | 6.24  |
| AC079801.2  | 13844  | A | G   | 21q11.2  | 6.34  |
| AC079801.2  | 25943  | G | A   | 21q11.2  | 8.14  |
| AC079801.2  | 27828  | A | G   | 21q11.2  | 6.4   |
| AC079801.2  | 30735  | C | A   | 21q11.2  | 6.74  |
| AC079801.2  | 92605  | A | C   | 21p11.1  | 6.96  |
| AC079801.2  | 93183  | G | C/T | 21q11.2  | 6.81  |
| AC079801.2  | 125431 | A | G   | 21q11.2  | 6.39  |
| AC079801.2  | 158358 | A | T   | 21q11.2  | 6.8   |
| AC079934.3  | 27860  | G | A   | 1q21.1   | 7.07  |
| AC079934.3  | 45099  | G | T   | 1q21.1   | 6.73  |
| AC092107.5  | 44555  | T | C   | 20q11.22 | 6     |
| AC092107.5  | 66740  | A | C   | 20q11.21 | 6.72  |
| AC092107.5  | 84724  | C | T   | 20q11.21 | 6.29  |
| AC092107.5  | 90471  | T | G   | 20q11.21 | 6.75  |
| AC093749.3  | 115719 | C | T   | 22q11.1  | 6.38  |
| AC099395.2  | 30360  | C | T   | 7q34     | 6.11  |
| AC104301.2  | 16342  | C | T   | 20q11.21 | 8.92  |
| AC104301.2  | 34970  | T | C   | 20q11.21 | 7.53  |
| AC104301.2  | 40758  | G | A   | 20q11.21 | 9.28  |
| AC104301.2  | 48554  | A | G   | 20q11.23 | 6.7   |
| AC104301.2  | 77955  | T | C   | 20p11.21 | 7.33  |
| AC104301.2  | 103871 | C | A   | 20q11.21 | 6.68  |
| AC104301.2  | 121943 | C | T   | 20q11.21 | 6.6   |
| AC104301.2  | 125942 | C | T   | 20p11.21 | 9.3   |
| AC104301.2  | 126765 | T | C   | 20q11.21 | 9.58  |
| AC104301.2  | 127056 | C | T   | 20q11.21 | 8.41  |
| AC104301.2  | 129126 | C | T   | 20q11.21 | 6.57  |
| AC104301.2  | 129842 | T | G   | 20q11.21 | 9.3   |
| AC104301.2  | 131354 | G | T   | 20q11.21 | 9.45  |
| AC104301.2  | 131979 | A | G   | 20q11.21 | 8     |
| AC104301.2  | 131985 | T | C   | 20p11.21 | 6.82  |
| AC104301.2  | 133690 | G | A   | 20q11.21 | 9.34  |
| AC104301.2  | 134240 | G | C   | 20q11.21 | 8.03  |
| AC104301.2  | 134337 | A | T   | 20p11.21 | 8.44  |
| AC104301.2  | 135927 | G | A   | 20p11.21 | 6.96  |
| AC104301.2  | 137169 | C | T   | 20q11.21 | 8.31  |
| AC104301.2  | 137342 | A | G   | 20q11.22 | 12.4  |
| AC104301.2  | 137781 | A | T   | 20q11.21 | 9.76  |
| AC104301.2  | 138375 | G | A   | 20p11.21 | 8.93  |
| AC104301.2  | 138377 | G | T   | 20p11.21 | 8.92  |
| AC104301.2  | 138569 | A | C   | 20q11.21 | 9.4   |
| AC104301.2  | 139466 | G | T   | 20q11.21 | 9.06  |
| AC104301.2  | 139515 | G | T   | 20q11.21 | 9.56  |
| AC104301.2  | 139846 | C | T   | 20p11.21 | 8.04  |
| AC104301.2  | 142529 | C | T   | 20q11.21 | 11.34 |
| AC104301.2  | 142553 | C | A   | 20q11.21 | 6.35  |
| AC104301.2  | 142750 | G | C   | 20q11.21 | 6.51  |
| AC104301.2  | 143003 | A | G   | 20q11.21 | 9.79  |
| AC104301.2  | 143092 | G | A   | 20q11.21 | 8.54  |
| AC104301.2  | 143690 | A | G   | 20q11.22 | 8.41  |
| AC104301.2  | 143875 | G | A   | 20q11.21 | 6.47  |

|            |        |   |     |          |       |
|------------|--------|---|-----|----------|-------|
| AC104301.2 | 144823 | G | T   | 20q11.21 | 8.82  |
| AC104301.2 | 145676 | T | A   | 20q11.22 | 12.27 |
| AC104301.2 | 146095 | T | C   | 20q11.21 | 8.68  |
| AC104301.2 | 146232 | C | A/T | 20q11.22 | 6.82  |
| AC104301.2 | 146235 | T | A   | 20q11.22 | 7.5   |
| AC104301.2 | 147307 | T | C   | 20p11.21 | 6.03  |
| AC104301.2 | 147659 | C | G   | 20q11.21 | 10.13 |
| AC104301.2 | 148647 | T | G   | 20q11.21 | 8.69  |
| AC104301.2 | 149489 | A | G   | 20q11.21 | 9.63  |
| AC104301.2 | 149658 | G | A   | 20q11.21 | 10.47 |
| AC104301.2 | 149837 | A | G   | 20q11.21 | 10.25 |
| AC104301.2 | 150107 | A | G   | 20q11.21 | 8.39  |
| AC104301.2 | 150862 | A | G   | 20q11.21 | 9.59  |
| AC104301.2 | 151253 | G | A   | 20q11.21 | 8.32  |
| AC104301.2 | 151734 | T | A   | 20q11.21 | 10.4  |
| AC104301.2 | 152234 | T | C   | 20q11.21 | 9.55  |
| AC104301.2 | 153456 | C | T   | 20q11.21 | 9.45  |
| AC104301.2 | 154337 | A | G   | 20q11.21 | 9.2   |
| AC104301.2 | 154579 | A | G   | 20q11.21 | 10.49 |
| AC104301.2 | 154835 | T | G   | 20q11.21 | 9.79  |
| AC104301.2 | 154934 | G | C   | 20q11.21 | 8.73  |
| AC104301.2 | 154981 | C | G   | 20q11.21 | 9.55  |
| AC104301.2 | 155261 | C | A/T | 20q11.21 | 6.62  |
| AC104301.2 | 155333 | C | A   | 20q11.21 | 10.09 |
| AC104301.2 | 155408 | G | A   | 20p11.21 | 9.15  |
| AC104301.2 | 156091 | T | G   | 20q11.21 | 11.86 |
| AC104301.2 | 156315 | T | A   | 20q11.21 | 8.5   |
| AC104301.2 | 157268 | C | T   | 20q11.21 | 8.86  |
| AC104301.2 | 157728 | C | T   | 20q11.21 | 7.78  |
| AC104301.2 | 158068 | C | A   | 20q11.21 | 9.15  |
| AC104301.2 | 158866 | C | T   | 20q11.21 | 9.55  |
| AC104301.2 | 159689 | A | G   | 20q11.21 | 9.56  |
| AC104301.2 | 160036 | C | T   | 20q11.22 | 11.01 |
| AC104301.2 | 160212 | T | A   | 20q11.21 | 7.01  |
| AC104301.2 | 162764 | C | G   | 20q11.21 | 9.57  |
| AC104301.2 | 164826 | A | G   | 20q11.21 | 8.91  |
| AC104301.2 | 165000 | G | C   | 20q11.22 | 11.9  |
| AC104301.2 | 165293 | A | C/G | 20q11.21 | 6.69  |
| AC104301.2 | 165294 | A | G   | 20q11.21 | 9.7   |
| AC104301.2 | 165366 | T | C   | 20q11.21 | 11.59 |
| AC104301.2 | 165466 | T | C   | 20q11.21 | 11.79 |
| AC104301.2 | 166560 | T | A   | 20q11.21 | 8.89  |
| AC104301.2 | 167137 | C | T   | 20q11.21 | 6.51  |
| AC104301.2 | 167278 | T | G   | 20q11.21 | 11.63 |
| AC104301.2 | 170063 | G | A   | 20p11.1  | 8.88  |
| AC104301.2 | 170115 | A | T   | 20p11.21 | 9.24  |
| AC104301.2 | 170927 | G | A   | 20p11.21 | 7.77  |
| AC110072.3 | 10486  | G | A/C | 7p11.2   | 7.17  |
| AC114745.6 | 140262 | A | C   | 2q31.1   | 6.08  |
| AC114936.2 | 14524  | G | C   | 5q35.3   | 7.87  |
| AC116618.4 | 44988  | C | T   | 22q11.1  | 6.13  |
| AC116618.4 | 95764  | A | G   | 22q11.21 | 6.48  |
| AC127380.4 | 93425  | T | C   | 9q21.11  | 6.61  |

|            |        |   |     |                 |       |
|------------|--------|---|-----|-----------------|-------|
| AC127701.2 | 66664  | T | C   | 7p12.3          | 6.88  |
| AC127701.2 | 72065  | A | C   | 7p12.1          | 6.68  |
| AC127701.2 | 73550  | G | A   | 7q11.22         | 6.18  |
| AC129531.8 | 138784 | A | G   | 17q24.1         | 11.7  |
| AC129531.8 | 138860 | A | G   | 17q24.1         | 16.39 |
| AC129531.8 | 139217 | A | G   | 17q24.1         | 16.6  |
| AC129531.8 | 139512 | T | C   | 17q23.3-17q24.1 | 17.72 |
| AC129531.8 | 140352 | T | C   | 17q24.1         | 18.6  |
| AC129531.8 | 141233 | T | C   | 17q24.1         | 7.78  |
| AC129531.8 | 141396 | A | C   | 17q24.1         | 19.87 |
| AC129531.8 | 142714 | T | C   | 17q24.1         | 16.1  |
| AC129531.8 | 143306 | G | A   | 17q24.1         | 6.96  |
| AC129531.8 | 143408 | G | T   | 17q24.1         | 18.58 |
| AC129531.8 | 143722 | C | G   | 17q24.1         | 11.89 |
| AC129531.8 | 144537 | G | C   | 17q24.1         | 6.85  |
| AC129531.8 | 148500 | C | A   | 17q23.2         | 6.86  |
| AC129531.8 | 149101 | T | C   | 17q24.1         | 16.62 |
| AC129531.8 | 150654 | C | T   | 17q24.1         | 9.11  |
| AC129531.8 | 151028 | G | A   | 17q24.1         | 22.36 |
| AC129531.8 | 152890 | C | T   | 17q24.1         | 12.92 |
| AC129531.8 | 153723 | G | A   | 17q24.1         | 17.28 |
| AC129531.8 | 154334 | G | T   | 17q23.2         | 6.79  |
| AC129531.8 | 154920 | G | A   | 17q23.3         | 19.99 |
| AC129531.8 | 155164 | G | A   | 17q24.1         | 7.09  |
| AC129531.8 | 156412 | C | T   | 17q24.1         | 7.58  |
| AC129531.8 | 157961 | T | A   | 17q24.1         | 19.32 |
| AC129531.8 | 158660 | G | T   | 17q24.1         | 21.89 |
| AC129531.8 | 159061 | G | A   | 17q24.1         | 20.39 |
| AC129531.8 | 159460 | C | T   | 17q24.1         | 20.36 |
| AC129664.7 | 156381 | A | G   | 21q11.2         | 6.17  |
| AC129779.2 | 21003  | T | C   | 16q12.1         | 6.38  |
| AC129782.3 | 3024   | C | T   | 1q21.1          | 6.4   |
| AC129782.3 | 47221  | C | G   | 1q21.1          | 8.46  |
| AC133920.2 | 67896  | C | T   | 16p11.2         | 7.8   |
| AC137488.2 | 131217 | C | A   | 22q11.21        | 6.05  |
| AC138774.4 | 49079  | C | T   | 14q11.2         | 7.6   |
| AC138774.4 | 176174 | A | G   | 14q11.2         | 6.02  |
| AC144895.2 | 54827  | G | A/T | 2q11.2          | 6     |
| AC144895.2 | 54865  | G | C   | 2q11.2          | 6.45  |
| AC144895.2 | 74522  | C | A   | 2q11.2          | 6.36  |
| AC144895.2 | 95627  | G | A/T | 2p11.2          | 6.58  |
| AC144895.2 | 96212  | T | A   | 2p11.2          | 6.82  |
| AC144895.2 | 131284 | T | C   | 2p11.2          | 6.91  |
| AC144896.3 | 24129  | G | T   | 2p11.2          | 10.98 |
| AC144896.3 | 25725  | T | A   | 2p11.2          | 6.47  |
| AC144896.3 | 48812  | C | T   | 2q11.1          | 6.96  |
| AC144896.3 | 65090  | A | T   | 2p12            | 6.37  |
| AC144896.3 | 75851  | C | G   | 2p11.2          | 6.55  |
| AC144896.3 | 79402  | A | G   | 2p11.2          | 7.82  |
| AC153808.1 | 17972  | G | A   | 10q26.2         | 6.56  |
| AC158326.1 | 14400  | C | T   | 12q14.1         | 6.24  |
| AC158326.1 | 14778  | A | T   | 12q14.1         | 6.64  |
| AC158326.1 | 15708  | G | A   | 12q13.3         | 7.71  |

|            |       |   |   |          |       |
|------------|-------|---|---|----------|-------|
| AC187650.1 | 7439  | T | C | 17q25.3  | 7.53  |
| AC187650.1 | 8253  | A | C | 17q25.3  | 7.53  |
| AC187650.1 | 8519  | A | C | 17q25.3  | 7.05  |
| AC187650.1 | 10338 | C | A | 17q25.3  | 9.99  |
| AC187650.1 | 11806 | C | G | 17q25.3  | 7.09  |
| AC187650.1 | 12674 | C | T | 17q25.3  | 8.11  |
| AC187650.1 | 14798 | C | T | 17q25.3  | 7.66  |
| AC187650.1 | 15230 | T | A | 17q25.3  | 7.17  |
| AC187650.1 | 15656 | G | C | 17q25.3  | 6.23  |
| AC187650.1 | 16537 | G | A | 17q25.3  | 15.9  |
| AC187650.1 | 16908 | T | A | 17q25.3  | 6.75  |
| AC187650.1 | 17418 | C | T | 17q25.3  | 6.98  |
| AC187650.1 | 17750 | A | G | 17q25.3  | 11.2  |
| AC187650.1 | 18774 | G | A | 17q25.3  | 7.5   |
| AC187650.1 | 18793 | G | A | 17q25.3  | 8.58  |
| AC187650.1 | 19913 | C | T | 17q25.3  | 7.16  |
| AC187650.1 | 19962 | T | C | 17q25.3  | 10.69 |
| AC187650.1 | 21585 | A | G | 17q25.3  | 7.93  |
| AC187650.1 | 21608 | C | T | 17q25.3  | 7.03  |
| AC187650.1 | 21694 | A | G | 17q25.3  | 9.69  |
| AC187817.1 | 17468 | A | G | 17p11.2  | 7.53  |
| AC187817.1 | 21556 | A | G | 17q11.2  | 6.66  |
| AC195745.1 | 15460 | G | T | 12q24.32 | 6.93  |
| AC195745.1 | 21012 | A | G | 12q24.32 | 6.66  |
| AC195745.1 | 24840 | C | T | 12q24.32 | 8.32  |
| AC195745.1 | 25519 | G | A | 12q24.32 | 6.07  |
| AC195745.1 | 27709 | A | G | 12q24.32 | 8.09  |
| AC196515.1 | 7451  | A | G | 8q24.21  | 7.03  |
| AC196515.1 | 7659  | G | A | 8q24.21  | 7.31  |
| AC203638.2 | 31676 | C | T | 16q23.1  | 8.29  |
| AC203638.2 | 33138 | A | G | 16q23.1  | 6.43  |
| AC203638.2 | 33901 | C | A | 16q23.1  | 6.6   |
| AC203638.2 | 34168 | A | G | 16q23.1  | 6.16  |
| AC203638.2 | 35695 | G | A | 16q23.1  | 7.38  |
| AC203659.3 | 19115 | G | T | 15q11.2  | 6.09  |
| AC203659.3 | 19678 | C | T | 15q11.2  | 6.73  |
| AC206474.2 | 35042 | C | T | 21q21.3  | 7.71  |
| AC206587.3 | 20213 | C | A | 19p13.3  | 8.31  |
| AC206743.2 | 29971 | T | C | 21q11.2  | 6.23  |
| AC206743.2 | 30363 | T | C | 21q11.2  | 6.03  |
| AC206743.2 | 35306 | G | T | 21q11.2  | 7.49  |
| AC207442.4 | 16443 | A | G | 1q44     | 7.2   |
| AC207442.4 | 16997 | G | T | 1q44     | 6.92  |
| AC207442.4 | 17889 | C | T | 1q44     | 7.04  |
| AC207442.4 | 18811 | T | C | 1q44     | 8.04  |
| AC207597.3 | 9834  | A | C | 13q21.33 | 7.29  |
| AC207713.3 | 28364 | A | C | 14q21.3  | 10.7  |
| AC207999.3 | 17383 | T | G | 2p25.2   | 6.38  |
| AC207999.3 | 19855 | A | G | 2p25.2   | 6.6   |
| AC208064.3 | 28586 | A | C | 4q31.3   | 9.14  |
| AC208152.3 | 32962 | C | T | 3q26.31  | 6.25  |
| AC208152.3 | 34096 | C | A | 3q26.1   | 6.04  |
| AC208152.3 | 39665 | C | G | 3q26.1   | 6.44  |

|            |       |   |     |         |       |
|------------|-------|---|-----|---------|-------|
| AC208152.3 | 40526 | T | C   | 3q26.1  | 7.23  |
| AC208170.4 | 28293 | C | T   | 2q31.1  | 6.54  |
| AC208170.4 | 30455 | C | T   | 2q31.1  | 7.49  |
| AC208170.4 | 30533 | C | A   | 2q31.1  | 7.31  |
| AC208171.3 | 11853 | A | G   | 5q23.1  | 6.38  |
| AC208171.3 | 14138 | A | G   | 5q23.1  | 7.73  |
| AC208171.3 | 18715 | T | C   | 5q23.1  | 12.82 |
| AC208500.2 | 30912 | G | A   | 12q14.1 | 6.39  |
| AC208585.5 | 12756 | A | G   | 21q21.1 | 8.62  |
| AC208585.5 | 13332 | G | A   | 21q21.1 | 13    |
| AC208587.4 | 12235 | C | T   | 11p15.5 | 6.07  |
| AC208871.3 | 30145 | C | T   | 2q37.3  | 6.56  |
| AC208871.3 | 30660 | A | G   | 2q37.3  | 6.91  |
| AC208871.3 | 30766 | G | A   | 2q37.3  | 7.08  |
| AC208871.3 | 30950 | C | A   | 2q37.3  | 6.91  |
| AC208871.3 | 31347 | A | C   | 2q37.3  | 9.33  |
| AC208871.3 | 31354 | C | T   | 2q37.3  | 9.2   |
| AC208871.3 | 31361 | A | G   | 2q37.3  | 8.5   |
| AC208871.3 | 31367 | A | G   | 2q37.3  | 7.06  |
| AC208871.3 | 31512 | A | G   | 2q37.3  | 7.3   |
| AC208871.3 | 31518 | T | G   | 2q37.3  | 8.54  |
| AC208871.3 | 31523 | T | G   | 2q37.3  | 7.77  |
| AC208871.3 | 31757 | T | C   | 2q37.3  | 6     |
| AC208871.3 | 31953 | A | G   | 2q37.3  | 7.25  |
| AC208871.3 | 32071 | C | T   | 2q37.3  | 7.36  |
| AC208871.3 | 32261 | G | A   | 2q37.3  | 7.4   |
| AC208871.3 | 32593 | A | G   | 2q37.3  | 6.14  |
| AC208871.3 | 32629 | A | G   | 2q37.3  | 7.9   |
| AC208871.3 | 32679 | G | C   | 2q37.3  | 8.79  |
| AC208871.3 | 32777 | A | G   | 2q37.3  | 6.77  |
| AC208871.3 | 32875 | G | A   | 2q37.3  | 8.78  |
| AC208871.3 | 33383 | C | T   | 2q37.3  | 6.02  |
| AC208871.3 | 33426 | T | G   | 2q37.3  | 7.97  |
| AC208871.3 | 33580 | A | G   | 2q37.3  | 6.68  |
| AC208871.3 | 33745 | A | G   | 2q37.3  | 6.3   |
| AC208871.3 | 33814 | A | C/G | 2q37.3  | 6.94  |
| AC209007.3 | 27865 | T | C   | 1p35.2  | 7.06  |
| AC209007.3 | 28863 | G | A   | 1p34.3  | 6.17  |
| AC209007.3 | 29040 | A | G   | 1p35.2  | 7.46  |
| AC209007.3 | 29571 | G | A   | 1p35.2  | 7.38  |
| AC209007.3 | 29649 | C | T   | 1p35.2  | 6.49  |
| AC209007.3 | 29696 | T | C   | 1p35.2  | 7.86  |
| AC209232.3 | 29687 | G | A   | 1p36.12 | 8.56  |
| AC209232.3 | 30234 | T | C   | 1p36.12 | 13.37 |
| AC209232.3 | 30565 | C | T   | 1p36.12 | 15.79 |
| AC209232.3 | 30773 | T | G   | 1p36.12 | 8.01  |
| AC209232.3 | 30908 | G | A   | 1p36.12 | 12.87 |
| AC209232.3 | 32895 | A | G   | 1p36.12 | 9.03  |
| AC209232.3 | 33957 | C | A   | 1p36.11 | 7.95  |
| AC209232.3 | 34061 | A | G   | 1p36.12 | 16.43 |
| AC209232.3 | 35130 | G | A   | 1p36.12 | 8.41  |
| AC209232.3 | 35149 | T | A   | 1p36.12 | 13.19 |
| AC209232.3 | 35382 | C | T   | 1p36.12 | 17.97 |



|            |       |   |   |          |       |
|------------|-------|---|---|----------|-------|
| AC209232.3 | 35962 | A | G | 1p36.12  | 7.38  |
| AC209232.3 | 36094 | A | T | 1p36.12  | 13.06 |
| AC209232.3 | 36842 | C | T | 1p36.12  | 8.21  |
| AC209232.3 | 37030 | C | T | 1p36.12  | 6.15  |
| AC209234.3 | 6936  | T | A | 6q14.1   | 7.08  |
| AC209234.3 | 9815  | T | A | 6q14.1   | 6.13  |
| AC209234.3 | 17644 | C | A | 6q14.1   | 6.59  |
| AC209236.4 | 26134 | C | G | 20q13.13 | 6.09  |
| AC209236.4 | 31667 | T | G | 20q13.13 | 9.38  |
| AC209310.3 | 9666  | A | G | 19p13.3  | 7.73  |
| AC209310.3 | 10920 | G | A | 19p13.3  | 7.77  |
| AC209310.3 | 12319 | G | C | 19p13.3  | 6.4   |
| AC209618.3 | 22103 | C | G | 22q12.3  | 7.58  |
| AC209618.3 | 22620 | G | A | 22q12.3  | 8.46  |
| AC210865.4 | 21756 | G | A | 17q25.1  | 7.42  |
| AC212296.2 | 27529 | G | T | 1p31.1   | 6.4   |
| AC212752.2 | 23839 | G | A | 1q31.3   | 7.38  |
| AC212759.2 | 15609 | T | C | 13q31.1  | 7.5   |
| AC212759.2 | 15964 | G | T | 13q31.1  | 8.55  |
| AC212759.2 | 18145 | T | A | 13q31.1  | 6.29  |
| AC212759.2 | 18376 | C | T | 13q31.1  | 6.4   |
| AC213027.4 | 27007 | C | T | 17q21.31 | 11.23 |
| AC213033.3 | 11411 | G | C | 3p13     | 6.23  |
| AC213033.3 | 15864 | A | G | 3p12.3   | 6.04  |
| AC213033.3 | 16336 | C | T | 3p13     | 10.99 |
| AC213191.1 | 18593 | G | C | 15q24.3  | 10.05 |
| AC213191.1 | 19343 | C | T | 15q24.2  | 18.72 |
| AC213191.1 | 19747 | C | T | 15q24.2  | 13.31 |
| AC213223.1 | 13741 | A | G | 11q12.1  | 6.76  |
| AC213223.1 | 15084 | C | A | 11q12.1  | 8.25  |
| AC213223.1 | 17027 | A | G | 11q12.1  | 9.46  |
| AC213223.1 | 21015 | T | A | 11q12.1  | 6.41  |
| AC213223.1 | 21055 | G | A | 11q12.1  | 7.23  |
| AC213223.1 | 21124 | T | G | 11q12.1  | 6.1   |
| AC213223.1 | 21215 | T | C | 11q12.1  | 6.34  |
| AC213223.1 | 22208 | A | T | 11q12.1  | 9.46  |
| AC213223.1 | 22376 | C | T | 11q12.1  | 8.21  |
| AC215700.3 | 29792 | C | G | 14q32.12 | 8.57  |
| AC215700.3 | 30131 | C | T | 14q32.12 | 6.84  |
| AC215700.3 | 30398 | A | G | 14q32.12 | 14.91 |
| AC215710.4 | 16154 | C | A | 9q33.3   | 9.26  |
| AC215710.4 | 16723 | G | A | 9q33.3   | 6.13  |
| AC215710.4 | 18241 | A | G | 9q33.3   | 6.75  |
| AC215710.4 | 19436 | C | T | 9q33.3   | 10.22 |
| AC216142.3 | 27250 | C | T | 2q24.2   | 6.34  |
| AC216142.3 | 28583 | T | C | 2q24.2   | 6.52  |
| AC216142.3 | 28852 | A | G | 2q24.2   | 6.13  |
| AC216142.3 | 29636 | T | C | 2q24.2   | 6.99  |
| AC216971.3 | 28382 | G | C | 18q22.3  | 6.28  |
| AC216971.3 | 29389 | T | C | 18q22.3  | 6.3   |
| AC217018.3 | 7479  | G | A | 7q22.1   | 7.03  |
| AC217018.3 | 7684  | G | A | 7q22.1   | 10.06 |
| AC217018.3 | 7824  | A | G | 7q22.1   | 7.14  |

|            |       |   |   |          |       |
|------------|-------|---|---|----------|-------|
| AC217018.3 | 10066 | G | T | 7q22.1   | 7.48  |
| AC217018.3 | 12328 | G | C | 7q22.1   | 7.42  |
| AC217018.3 | 12633 | A | C | 7q22.1   | 7.92  |
| AC217018.3 | 13835 | C | T | 7q22.1   | 7.64  |
| AC217018.3 | 14056 | G | A | 7q22.1   | 6.93  |
| AC217018.3 | 15553 | C | T | 7q22.1   | 6.74  |
| AC217018.3 | 16266 | G | A | 7q22.1   | 6.63  |
| AC217018.3 | 16400 | C | T | 7q22.1   | 7.9   |
| AC217018.3 | 16884 | A | C | 7q22.1   | 7.34  |
| AC217018.3 | 18025 | T | C | 7q22.1   | 6.66  |
| AC217018.3 | 19541 | G | A | 7q22.1   | 8.33  |
| AC223430.3 | 18038 | G | T | 8p23.1   | 6.32  |
| AC223430.3 | 19396 | T | C | 8p23.1   | 6.36  |
| AC223430.3 | 20690 | G | A | 8p23.1   | 6.71  |
| AC223430.3 | 22778 | T | C | 8p23.1   | 6.04  |
| AC223430.3 | 23331 | C | G | 8p23.1   | 7.28  |
| AC223430.3 | 23553 | A | C | 8p23.1   | 6.37  |
| AC223431.3 | 18043 | T | A | 12p13.1  | 6.45  |
| AC223431.3 | 18097 | A | G | 12p13.1  | 7.51  |
| AC223431.3 | 18775 | G | A | 12p13.2  | 6.91  |
| AC223431.3 | 18794 | C | G | 12p13.1  | 9.14  |
| AC223431.3 | 20430 | C | T | 12p13.1  | 8.78  |
| AC223431.3 | 20598 | G | T | 12p13.1  | 7.76  |
| AC223431.3 | 20738 | T | C | 12p13.2  | 6.82  |
| AC225099.4 | 29675 | T | C | 1q43     | 14.71 |
| AC225168.3 | 6813  | G | A | 6q27     | 6.96  |
| AC225595.1 | 16474 | C | T | 11q13.4  | 7.37  |
| AC225768.2 | 9329  | C | T | 2q33.3   | 8.39  |
| AC225768.2 | 9337  | G | C | 2q33.3   | 8.96  |
| AC225768.2 | 11637 | T | C | 2q33.3   | 9.51  |
| AC225889.3 | 503   | T | A | 20q11.21 | 6.37  |
| AC225889.3 | 1114  | G | T | 20q11.21 | 8.27  |
| AC225889.3 | 1130  | G | C | 20q11.22 | 8.15  |
| AC225889.3 | 1223  | T | C | 20q11.21 | 7.21  |
| AC225889.3 | 2313  | G | A | 20p11.21 | 9.97  |
| AC225889.3 | 2591  | A | T | 20q11.21 | 6.22  |
| AC225889.3 | 2737  | G | A | 20p11.21 | 6.7   |
| AC225889.3 | 2837  | G | A | 20p11.21 | 8.8   |
| AC225889.3 | 5545  | A | C | 20q11.23 | 6.83  |
| AC225889.3 | 6632  | T | G | 20q11.21 | 6.17  |
| AC225889.3 | 6889  | G | C | 20p11.21 | 6.18  |
| AC225889.3 | 7283  | G | A | 20q11.21 | 7.32  |
| AC226622.3 | 9437  | G | A | 14q21.3  | 6.32  |
| AC226627.3 | 30980 | A | C | 16q22.2  | 9.98  |
| AC226627.3 | 31359 | C | G | 16q22.2  | 8.35  |
| AC226627.3 | 31786 | G | T | 16q22.2  | 12.62 |
| AC226627.3 | 32198 | T | C | 16q22.2  | 13.42 |
| AC226627.3 | 32938 | C | T | 16q22.2  | 14.95 |
| AC226627.3 | 34499 | G | A | 16q22.2  | 15.01 |
| AC226627.3 | 35212 | A | G | 16q22.2  | 14.74 |
| AC226758.3 | 14678 | A | G | 4q22.1   | 6.13  |
| AC231386.2 | 19998 | T | C | 17q21.31 | 7.91  |
| AC231386.2 | 22511 | C | T | 17q21.2  | 7.24  |

|            |        |   |   |                 |       |
|------------|--------|---|---|-----------------|-------|
| AC231386.2 | 22615  | C | A | 17q21.2         | 8.06  |
| AC231386.2 | 23712  | T | C | 17q21.2         | 9.47  |
| AC231386.2 | 23720  | T | G | 17q21.2         | 6.53  |
| AC231386.2 | 24457  | A | G | 17q21.31        | 7.19  |
| AC231980.2 | 25656  | C | T | 2q14.1          | 8.16  |
| AC231987.2 | 846    | C | A | 19q13.11        | 6.16  |
| AC231988.2 | 4600   | C | T | 18q22.1         | 7.14  |
| AC231988.2 | 10578  | A | G | 18q22.1         | 7.36  |
| AC231988.2 | 11133  | G | A | 18q22.1         | 6.95  |
| AC233266.3 | 100017 | C | G | 2p11.2          | 6.24  |
| AC233266.3 | 100343 | A | C | 2p11.1-2q11.1   | 8.67  |
| AC233266.3 | 186949 | T | G | 2p11.2          | 7.88  |
| AC233266.3 | 188305 | C | T | 2q11.2          | 6.74  |
| AC233266.3 | 188857 | G | A | 2p11.2          | 12.87 |
| AC233266.3 | 189740 | A | G | 2p11.2          | 11.66 |
| AC233266.3 | 194107 | T | C | 2p11.2          | 7.6   |
| AC233266.3 | 194601 | G | A | 2q11.2          | 9.82  |
| AC233266.3 | 195062 | C | T | 2p11.2          | 17.63 |
| AC233266.3 | 195154 | C | T | 2p11.2          | 11.28 |
| AC233266.3 | 195912 | C | T | 2p11.2          | 12.1  |
| AC233274.2 | 35179  | T | A | 17p13.3         | 6.02  |
| AC233698.3 | 107967 | C | G | 17q12           | 6.64  |
| AC233698.3 | 108518 | T | A | 17q12           | 8.28  |
| AC233698.3 | 110056 | C | T | 17q12           | 7.04  |
| AC233698.3 | 110280 | T | C | 17q12           | 6.41  |
| AC233698.3 | 110549 | T | C | 17q12           | 8.06  |
| AC233702.5 | 178382 | G | A | 17p11.2         | 6.54  |
| AC233702.5 | 179708 | A | G | 17p11.2         | 7.64  |
| AC233702.5 | 183512 | T | C | 17p11.2         | 7.88  |
| AC233702.5 | 194739 | T | A | 17q11.2         | 6.01  |
| AC233702.5 | 195493 | G | A | 17p12           | 6.3   |
| AC233702.5 | 197985 | G | A | 17q11.2         | 7.52  |
| AC233702.5 | 199826 | T | G | 17q11.2         | 7.57  |
| AC233702.5 | 200699 | T | C | 17q11.2         | 6.2   |
| AC233714.2 | 25786  | C | G | 6q27            | 7.24  |
| AC233754.2 | 19755  | T | C | 6p12.3          | 7.87  |
| AC233754.2 | 30128  | A | C | 6p12.3          | 7.56  |
| AC234063.4 | 61569  | G | A | 17q23.3-17q24.1 | 7.89  |
| AC234063.4 | 81724  | G | C | 17q24.1         | 7.6   |
| AC234063.4 | 83069  | A | G | 17q24.1         | 6.24  |
| AC234063.4 | 84668  | A | G | 17q23.3         | 7.36  |
| AC234063.4 | 85726  | G | T | 17q24.1         | 7.35  |
| AC234063.4 | 86738  | A | G | 17q24.1         | 8.03  |
| AC234063.4 | 88333  | C | T | 17q23.3         | 9.13  |
| AC234063.4 | 91662  | G | A | 17q23.3         | 6.63  |
| AC234063.4 | 94624  | G | A | 17q24.1         | 11.94 |
| AC234063.4 | 95194  | T | C | 17q24.1         | 10.11 |
| AC234063.4 | 97715  | A | G | 17q24.1         | 14.14 |
| AC234063.4 | 97850  | G | A | 17q24.1         | 7.61  |
| AC234063.4 | 99102  | C | T | 17q23.2         | 14.61 |
| AC234063.4 | 100469 | A | G | 17q23.3-17q24.1 | 6.62  |
| AC234063.4 | 103115 | G | A | 17q24.1         | 13.45 |
| AC234063.4 | 107936 | C | T | 17q23.3-17q24.1 | 6.82  |

|            |        |   |   |          |       |
|------------|--------|---|---|----------|-------|
| AC234063.4 | 112297 | C | T | 17q24.1  | 7.19  |
| AC234063.4 | 112589 | A | G | 17q24.1  | 10.06 |
| AC234063.4 | 114732 | A | C | 17q23.2  | 14.1  |
| AC234063.4 | 115416 | C | A | 17q24.1  | 14.48 |
| AC234063.4 | 115638 | A | T | 17q24.1  | 15.56 |
| AC234063.4 | 116277 | T | C | 17q24.1  | 15.24 |
| AC234063.4 | 117157 | T | C | 17q24.1  | 6.18  |
| AC234063.4 | 119475 | A | T | 17q23.2  | 8.11  |
| AC234063.4 | 119728 | G | A | 17q23.2  | 6.33  |
| AC234063.4 | 119954 | G | A | 17q23.2  | 6.24  |
| AC234063.4 | 120068 | C | T | 17q23.2  | 6.47  |
| AC234063.4 | 120659 | T | C | 17q23.2  | 8.14  |
| AC234063.4 | 120739 | G | A | 17q23.2  | 7.09  |
| AC234063.4 | 121256 | G | A | 17q23.2  | 7.13  |
| AC234063.4 | 123728 | C | T | 17q23.2  | 6.26  |
| AC234063.4 | 125413 | A | G | 17q24.1  | 16.95 |
| AC234063.4 | 125502 | G | C | 17q24.1  | 20.83 |
| AC234063.4 | 126319 | C | A | 17q24.1  | 17.28 |
| AC234063.4 | 126326 | G | A | 17q24.1  | 16.71 |
| AC234063.4 | 128446 | A | G | 17q24.1  | 7.89  |
| AC234063.4 | 130287 | A | G | 17q24.1  | 6.75  |
| AC234063.4 | 130764 | A | T | 17q24.1  | 11.17 |
| AC234063.4 | 132508 | C | G | 17q24.1  | 6.66  |
| AC234063.4 | 133383 | T | A | 17q24.1  | 12.49 |
| AC234063.4 | 134793 | C | T | 17q24.1  | 6.25  |
| AC234228.3 | 30236  | T | C | 3q29     | 7.68  |
| AC234228.3 | 34575  | A | G | 3q29     | 6.63  |
| AC234228.3 | 35109  | G | A | 3q29     | 6.38  |
| AC234228.3 | 35439  | C | T | 3q29     | 7.51  |
| AC234301.2 | 29650  | T | C | 14q32.33 | 8.16  |
| AC234301.2 | 33090  | G | A | 14q32.33 | 6.31  |
| AC234421.2 | 23659  | A | T | 11q13.4  | 17.94 |
| AC234421.2 | 24476  | T | C | 11q13.4  | 9.64  |
| AC234421.2 | 26024  | T | G | 11q13.4  | 10.49 |
| AC234421.2 | 27374  | G | A | 11q13.4  | 10.83 |
| AC234421.2 | 27939  | T | C | 11q13.4  | 6.56  |
| AC234421.2 | 32759  | A | C | 11q13.4  | 6.17  |
| AC234421.2 | 33657  | A | C | 11q13.4  | 6.07  |
| AC234421.2 | 38359  | T | G | 11q13.4  | 6.14  |
| AC234421.2 | 38813  | A | G | 11q13.4  | 6.72  |
| AC235759.2 | 23663  | T | G | 12q21.1  | 7.14  |
| AC235952.3 | 9635   | G | C | 3p14.1   | 6.17  |
| AC235952.3 | 16654  | C | T | 3p14.1   | 7.39  |
| AC235952.3 | 17570  | T | G | 3p14.1   | 8.05  |
| AC235952.3 | 18066  | T | C | 3p14.1   | 9.69  |
| AC235952.3 | 20186  | T | C | 3p14.1   | 11.77 |
| AC235952.3 | 23468  | T | C | 3p14.1   | 6.74  |
| AC238709.3 | 26013  | A | C | 19q13.11 | 6.65  |
| AC238709.3 | 26633  | G | A | 19q13.11 | 7.12  |
| AC238709.3 | 26925  | G | A | 19q13.11 | 7.21  |
| AC238709.3 | 27171  | C | T | 19q13.11 | 6.36  |
| AC238893.3 | 15327  | G | A | 19p13.2  | 7.7   |
| AC238894.3 | 12990  | C | T | 20q13.33 | 6.68  |

|            |        |   |   |          |       |
|------------|--------|---|---|----------|-------|
| AC238958.2 | 24954  | A | G | 2q21.3   | 6.96  |
| AC239584.4 | 172931 | T | A | 4q13.3   | 8.68  |
| AC239584.4 | 173032 | T | C | 4q13.3   | 9.04  |
| AC239584.4 | 173221 | G | T | 4q13.3   | 7.8   |
| AC239584.4 | 173373 | T | C | 4q13.3   | 9.77  |
| AC239584.4 | 173666 | G | A | 4q13.3   | 9.98  |
| AC239584.4 | 173783 | C | T | 4q13.3   | 10.27 |
| AC239584.4 | 173889 | T | A | 4q13.3   | 9.13  |
| AC239584.4 | 174174 | G | T | 4q13.3   | 9.37  |
| AC239584.4 | 174195 | A | G | 4q13.3   | 9.7   |
| AC239584.4 | 174462 | A | G | 4q13.3   | 8.71  |
| AC239584.4 | 174822 | C | A | 4q13.3   | 8.64  |
| AC239584.4 | 174900 | C | A | 4q13.3   | 10.98 |
| AC239584.4 | 175047 | A | T | 4q13.3   | 7.74  |
| AC239584.4 | 175357 | T | G | 4q13.3   | 8.03  |
| AC239584.4 | 175455 | C | T | 4q13.3   | 9.1   |
| AC239584.4 | 175463 | C | T | 4q13.3   | 7.24  |
| AC239584.4 | 175576 | T | G | 4q13.3   | 6.89  |
| AC239584.4 | 175792 | G | A | 4q13.3   | 7.87  |
| AC239584.4 | 175837 | A | G | 4q13.3   | 8.39  |
| AC239584.4 | 175854 | C | T | 4q13.3   | 8.82  |
| AC239584.4 | 175963 | A | T | 4q13.3   | 8.98  |
| AC239584.4 | 176007 | T | C | 4q13.3   | 9.33  |
| AC239584.4 | 176071 | C | T | 4q13.3   | 6.37  |
| AC239584.4 | 176306 | G | A | 4q13.3   | 8.9   |
| AC239860.3 | 53378  | C | G | 1q21.1   | 14.07 |
| AC239860.3 | 55815  | C | T | 1q21.1   | 16.14 |
| AC239860.3 | 58410  | A | G | 1q21.1   | 15.71 |
| AC239873.3 | 5873   | C | A | 22q11.23 | 6.93  |
| AC239873.3 | 5893   | T | C | 22q11.23 | 7.04  |
| AC239873.3 | 5902   | T | C | 22q11.23 | 7.65  |
| AC239873.3 | 7620   | C | T | 22q11.23 | 9.32  |
| AC240508.1 | 22308  | A | G | 3q13.2   | 7.69  |
| AC240577.2 | 22009  | C | T | 17q24.3  | 12.2  |
| AC241442.1 | 29441  | G | T | 8q24.3   | 6.08  |
| AC241442.1 | 29815  | G | A | 8q24.3   | 8.22  |
| AC241586.3 | 188517 | C | T | 1p11.2   | 9.19  |
| AC241586.3 | 191306 | A | G | 1q21.1   | 6.78  |
| AC241586.3 | 196002 | C | A | 1q21.1   | 8.43  |
| AC241851.2 | 11683  | A | G | 2q11.1   | 10.7  |
| AC241851.2 | 19987  | C | T | 2p11.2   | 10.41 |
| AC242001.2 | 2737   | G | A | 5p12     | 7.07  |
| AC242001.2 | 4366   | A | C | 5p12     | 7.27  |
| AC242001.2 | 12345  | T | A | 5p12     | 7.26  |
| AC242001.2 | 17236  | A | T | 5p12     | 6.73  |
| AC242001.2 | 20581  | G | A | 5q11.2   | 6.34  |
| AC242001.2 | 24474  | T | C | 5p12     | 7.01  |
| AC242001.2 | 27215  | C | T | 5p12     | 7.04  |
| AC242001.2 | 28149  | G | T | 5q11.1   | 7.1   |
| AC242001.2 | 38596  | T | C | 5p12     | 7.05  |
| AC242192.3 | 12706  | G | A | 20q11.21 | 9.85  |
| AC242192.3 | 18738  | A | G | 20q11.21 | 7.57  |
| AC242192.3 | 18971  | G | C | 20q11.21 | 8.08  |

|             |        |   |     |               |       |
|-------------|--------|---|-----|---------------|-------|
| AC242192.3  | 19245  | A | G   | 20q11.21      | 6.4   |
| AC242192.3  | 22253  | C | G   | 20q11.21      | 7.45  |
| AC242192.3  | 25078  | T | C   | 20q11.21      | 11.59 |
| AC242192.3  | 25206  | A | G   | 20p11.21      | 8.07  |
| AC242192.3  | 25233  | C | T   | 20q11.21      | 8.69  |
| AC242192.3  | 25277  | G | A   | 20p11.21      | 8.37  |
| AC242192.3  | 26329  | T | C   | 20p11.21      | 7.85  |
| AC242192.3  | 26915  | G | A   | 20q11.21      | 7.15  |
| AC242192.3  | 27247  | T | G   | 20q11.21      | 7.17  |
| AC242192.3  | 27805  | C | T   | 20q11.21      | 13.33 |
| AC242192.3  | 28062  | A | C   | 20p11.21      | 9.48  |
| AC242285.2  | 1500   | G | C/T | 20q11.21      | 6.61  |
| AC242285.2  | 24220  | T | C   | 20q11.21      | 6.39  |
| AC242285.2  | 32106  | T | A   | 20q11.21      | 6.19  |
| AC242285.2  | 32107  | C | A   | 20q11.21      | 6.21  |
| AC242285.2  | 33457  | A | C/G | 20q11.23      | 6.33  |
| AC242289.3  | 13872  | A | C   | 1p36.22       | 7.43  |
| AC242289.3  | 13923  | G | C   | 1p36.21       | 6.15  |
| AC242309.1  | 13148  | T | G   | 3p24.3        | 9.42  |
| AC242309.1  | 14262  | A | C   | 3p24.3        | 6.94  |
| AC242666.3  | 33330  | G | A   | 10p11.21      | 9.11  |
| AC243974.2  | 79807  | A | C   | 12p13.2       | 8.32  |
| AC243974.2  | 80911  | C | T   | 12p13.2       | 8.64  |
| AC244027.1  | 19955  | T | A   | 1p36.22       | 8.39  |
| AL137861.5  | 35668  | A | G   | 1q21.1        | 8.7   |
| AL354926.17 | 76242  | A | G   | 3q11.2        | 6.18  |
| AL354926.17 | 94994  | C | G   | 3p11.1        | 9.7   |
| AL354926.17 | 105619 | T | A   | 3p11.1        | 8.6   |
| AL354926.17 | 130786 | A | G   | 3p11.1        | 8.92  |
| AL354926.17 | 135853 | T | G   | 3p11.1        | 6.23  |
| AL772161.10 | 108965 | A | G   | 9q34.2        | 8.4   |
| AL845331.2  | 22332  | G | T   | 2q11.1        | 8.25  |
| AL845331.2  | 27481  | C | T   | 2p11.2        | 8.94  |
| AL845331.2  | 27497  | C | A   | 2q11.2        | 7.97  |
| AL845331.2  | 37698  | G | T   | 2p11.2        | 10.03 |
| AL845331.2  | 47818  | T | C   | 2q11.2        | 8.87  |
| BX119317.2  | 24422  | T | C   | 1p11.2        | 6.11  |
| BX640538.4  | 42311  | G | A   | 9q21.12       | 6.01  |
| BX640538.4  | 71767  | G | T   | 9p13.1        | 6.25  |
| CR854858.22 | 104332 | A | G   | 1p36.21       | 6.66  |
| CR854858.22 | 104482 | A | G   | 1p36.22       | 6.77  |
| CR854858.22 | 105172 | C | G   | 1p36.21       | 6.39  |
| CR854858.22 | 105882 | C | T   | 1p36.21       | 6.22  |
| CR854858.22 | 105933 | C | T   | 1p36.21       | 6.46  |
| CR854858.22 | 106571 | C | T   | 1p36.21       | 6.25  |
| CR854858.22 | 109929 | G | A   | 1p36.22       | 6.53  |
| FP325312.10 | 124742 | C | T   | 16q12.1       | 9.03  |
| FP325312.10 | 127369 | C | T   | 16q12.1       | 10.77 |
| FP325329.5  | 29474  | G | C   | 6p11.1-6q11.1 | 7.28  |
| FP325329.5  | 37637  | A | T   | 6q12          | 6.07  |
| FP325329.5  | 55197  | C | T   | 6p12.1-6p11.2 | 7.16  |
| FP325329.5  | 62875  | T | C   | 6q12          | 6.26  |
| FP325329.5  | 71863  | T | G   | 6q11.1-6q11.2 | 6.52  |

|                |          |   |     |                  |       |
|----------------|----------|---|-----|------------------|-------|
| FP565171.2     | 20653    | G | A   | 10q26.3          | 7.95  |
| FP565324.3     | 27082    | G | A   | 13q34            | 6.03  |
| FP565421.3     | 13346    | T | A   | 20q11.22         | 8.19  |
| FP565421.3     | 14419    | C | A   | 20q11.21         | 7.62  |
| FP565421.3     | 15068    | C | T   | 20p11.21         | 7.68  |
| FP565421.3     | 15353    | T | C   | 20p11.21         | 8.34  |
| FP565421.3     | 16060    | C | A   | 20p11.21         | 8.23  |
| FP565421.3     | 16191    | A | T   | 20p11.21         | 7.8   |
| FP565421.3     | 16954    | A | C   | 20p11.21         | 7.73  |
| FP565421.3     | 17521    | G | T   | 20q11.21         | 8.09  |
| FP565421.3     | 17787    | C | T   | 20p11.21         | 7.79  |
| FP565421.3     | 17843    | T | G   | 20p11.21         | 7.68  |
| FP565421.3     | 17844    | G | T   | 20p11.21         | 7.65  |
| FP565421.3     | 18908    | T | G   | 20q11.21         | 7.82  |
| FP565421.3     | 19838    | G | A   | 20p11.21         | 8.14  |
| FP565421.3     | 20915    | T | C   | 20p11.21         | 7.37  |
| FP565421.3     | 26219    | T | C   | 20p11.21         | 6.74  |
| FP565421.3     | 26241    | G | C   | 20p11.21         | 6.37  |
| FP565421.3     | 26247    | A | G   | 20p11.21         | 7.36  |
| FP565794.2     | 7157     | G | T   | 10q11.21         | 9.18  |
| FP565794.2     | 22151    | C | T   | 10q11.21         | 11.44 |
| FP565795.1     | 7769     | G | A   | 6q27             | 11.89 |
| FP671131.2     | 3653     | A | T   | 9q22.2           | 8.97  |
| FP671131.2     | 5061     | A | G   | 9q22.2           | 7.79  |
| FP671131.2     | 7198     | T | C   | 9q22.1           | 6.06  |
| FP671131.2     | 7912     | G | A   | 9q22.2           | 6.32  |
| FP671131.2     | 17553    | G | A   | 9q22.1           | 6.01  |
| FP671131.2     | 20912    | C | T   | 9q22.2           | 6.73  |
| FP885534.9     | 13650    | T | A   | 6q21             | 10.38 |
| FP885534.9     | 20621    | G | C   | 6q21             | 8.91  |
| FP885917.2     | 3182     | T | C   | 18p11.21-18q11.1 | 7.54  |
| FP885917.2     | 7335     | A | C   | 18p11.21         | 6.98  |
| FP885917.2     | 7469     | C | A/T | 18p11.21         | 6.45  |
| FP885917.2     | 25246    | G | A   | 18q11.2          | 6.66  |
| NW_001838585.1 | 839490   | G | A/C | 1p36.33          | 7.6   |
| NW_001838585.1 | 840738   | T | C   | 1p36.33          | 9.56  |
| NW_001838579.2 | 27975142 | C | T   | 1p32.3           | 7.7   |
| NW_001838589.2 | 284701   | A | T   | 1p21.1           | 6.34  |
| NW_001838589.2 | 302948   | T | C   | 1p21.1           | 7.3   |
| NW_001838549.1 | 4727683  | C | T   | 1q43             | 6.54  |
| NW_001838549.1 | 4728940  | G | A   | 1q42.3           | 10.03 |
| NW_001838549.1 | 4729397  | A | G   | 1q42.3           | 6.56  |
| NW_001838549.1 | 4730432  | T | C   | 1q42.3           | 7.77  |
| NW_001838549.1 | 4730792  | C | T   | 1q42.3           | 14.02 |
| NW_001838554.1 | 1888309  | G | A   | 1q44             | 6.17  |
| NW_001838758.1 | 806631   | T | A   | 2p25.3           | 6.34  |
| NW_001838758.1 | 809218   | A | G   | 2p25.3           | 6.8   |
| NW_001838768.1 | 5382834  | C | T   | 2p23.3           | 8.04  |
| NW_001838769.1 | 11568316 | A | G   | 2p22.1           | 11.22 |
| NW_001838769.1 | 11568336 | C | G   | 2p22.1           | 9.27  |
| NW_001838769.1 | 27896351 | A | G   | 2p16.1           | 8.82  |
| NW_001838799.1 | 3113     | T | C   | 2q11.2           | 7.97  |
| NW_001838799.1 | 6950     | G | A   | 2p11.2           | 8.35  |

|                |       |   |     |               |       |
|----------------|-------|---|-----|---------------|-------|
| NW_001838799.1 | 6970  | G | A   | 2q11.1        | 7.08  |
| NW_001838799.1 | 6997  | T | A   | 2q11.1        | 8.35  |
| NW_001838799.1 | 7030  | A | G   | 2q11.1        | 6.51  |
| NW_001838799.1 | 7292  | A | T   | 2q11.1        | 14.67 |
| NW_001838799.1 | 7686  | G | C   | 2q11.1        | 9.78  |
| NW_001838799.1 | 13674 | C | G   | 2q11.1        | 8.8   |
| NW_001838799.1 | 16085 | T | C   | 2q11.2        | 6.05  |
| NW_001838799.1 | 16553 | A | C   | 2q11.2        | 8.46  |
| NW_001838799.1 | 18526 | C | T   | 2q11.2        | 7.01  |
| NW_001838799.1 | 18781 | A | C   | 2q11.1        | 7.33  |
| NW_001838799.1 | 18806 | A | G   | 2q11.1        | 7.28  |
| NW_001838799.1 | 18899 | A | T   | 2q11.2        | 7.22  |
| NW_001838799.1 | 18971 | G | A   | 2q11.1        | 6.67  |
| NW_001838799.1 | 26536 | A | G   | 2p11.2        | 6.34  |
| NW_001838799.1 | 26572 | A | T   | 2q11.1        | 6.94  |
| NW_001838799.1 | 26688 | C | G   | 2p12          | 6.19  |
| NW_001838799.1 | 27261 | A | T   | 2q11.1        | 6.24  |
| NW_001838799.1 | 27711 | C | T   | 2q11.1        | 7.18  |
| NW_001838799.1 | 28508 | G | A/T | 2q11.2        | 9.42  |
| NW_001838799.1 | 28668 | G | T   | 2p11.2        | 6.2   |
| NW_001838799.1 | 29049 | G | A   | 2p12          | 6.06  |
| NW_001838799.1 | 29210 | C | T   | 2p11.1-2q11.1 | 6.48  |
| NW_001838799.1 | 29704 | T | A   | 2q11.1        | 6.71  |
| NW_001838799.1 | 30494 | C | T   | 2p11.1-2q11.1 | 6.1   |
| NW_001838799.1 | 30582 | C | A   | 2p11.2        | 6.28  |
| NW_001838799.1 | 30759 | A | C   | 2q11.1        | 8.29  |
| NW_001838799.1 | 30880 | T | C   | 2q11.1        | 6.23  |
| NW_001838799.1 | 31361 | G | A   | 2q11.2        | 6.16  |
| NW_001838799.1 | 31421 | A | T   | 2q11.1        | 7.07  |
| NW_001838799.1 | 31437 | T | A   | 2q11.1        | 7.02  |
| NW_001838799.1 | 31533 | T | C   | 2q11.1        | 6.95  |
| NW_001838799.1 | 31901 | T | C   | 2q11.1        | 7.79  |
| NW_001838799.1 | 32400 | T | G   | 2p11.2        | 17.55 |
| NW_001838799.1 | 32612 | G | A   | 2q11.1        | 7.29  |
| NW_001838799.1 | 32984 | C | A   | 2q11.1        | 6.81  |
| NW_001838799.1 | 36377 | T | C   | 2q11.1        | 7.22  |
| NW_001838799.1 | 36611 | C | G   | 2q11.1        | 7.29  |
| NW_001838799.1 | 36639 | G | A   | 2q11.1        | 7.16  |
| NW_001838799.1 | 36642 | G | C   | 2q11.1        | 7.09  |
| NW_001838799.1 | 37222 | A | G   | 2q11.2        | 7.88  |
| NW_001838799.1 | 37860 | C | T   | 2q11.1        | 7.11  |
| NW_001838799.1 | 38421 | G | C   | 2q11.1        | 6.92  |
| NW_001838799.1 | 38706 | G | T   | 2p11.1-2q11.1 | 6.39  |
| NW_001838799.1 | 38729 | A | G   | 2q11.1        | 8.04  |
| NW_001838799.1 | 38937 | C | T   | 2q11.1        | 7.67  |
| NW_001838799.1 | 38951 | T | G   | 2q11.1        | 7.03  |
| NW_001838799.1 | 39114 | C | T   | 2q11.2        | 6.76  |
| NW_001838799.1 | 39654 | G | T   | 2q11.1        | 6.7   |
| NW_001838799.1 | 39803 | G | C   | 2q11.2        | 8.16  |
| NW_001838799.1 | 39890 | T | A   | 2p11.2        | 10.38 |
| NW_001838799.1 | 40184 | A | G   | 2q11.1        | 7.03  |
| NW_001838799.1 | 41054 | C | T   | 2p11.2        | 9.57  |
| NW_001838799.1 | 41165 | T | C   | 2q11.1        | 7.91  |



|                |          |   |   |               |       |
|----------------|----------|---|---|---------------|-------|
| NW_001838799.1 | 41205    | A | G | 2q11.1        | 6.91  |
| NW_001838799.1 | 41639    | A | T | 2q11.1        | 7.51  |
| NW_001838799.1 | 41754    | T | A | 2p11.1-2q11.1 | 6.33  |
| NW_001838799.1 | 41914    | A | G | 2q11.2        | 7.78  |
| NW_001838799.1 | 42990    | G | A | 2p11.1-2q11.1 | 6.19  |
| NW_001838799.1 | 43058    | C | T | 2p11.1-2q11.1 | 6.49  |
| NW_001838799.1 | 43102    | C | A | 2q11.1        | 6.76  |
| NW_001838799.1 | 43384    | A | T | 2q11.1        | 8.09  |
| NW_001838799.1 | 43681    | C | T | 2q11.1        | 8.3   |
| NW_001838799.1 | 43864    | G | A | 2q11.1        | 7     |
| NW_001838799.1 | 44079    | T | G | 2q11.1        | 7.14  |
| NW_001838799.1 | 44244    | A | G | 2p11.2        | 17.88 |
| NW_001838799.1 | 44258    | G | T | 2q11.2        | 7     |
| NW_001838799.1 | 45152    | C | T | 2q11.1        | 6.63  |
| NW_001838799.1 | 45848    | T | C | 2q11.1        | 6.69  |
| NW_001838799.1 | 46154    | C | A | 2p11.1-2q11.1 | 6.49  |
| NW_001838799.1 | 46262    | C | A | 2p11.1-2q11.1 | 6.32  |
| NW_001838799.1 | 46923    | A | G | 2q11.1        | 13.7  |
| NW_001838799.1 | 47155    | C | T | 2q11.1        | 7.17  |
| NW_001838799.1 | 48313    | G | C | 2p11.1-2q11.1 | 6.42  |
| NW_001838799.1 | 48479    | C | T | 2q11.1        | 7.04  |
| NW_001838799.1 | 50078    | C | T | 2q11.2        | 6.3   |
| NW_001838799.1 | 50092    | G | A | 2q11.2        | 6.85  |
| NW_001838799.1 | 50152    | A | T | 2p11.1-2q11.1 | 6.2   |
| NW_001838799.1 | 50265    | G | A | 2q11.1        | 7.43  |
| NW_001838799.1 | 50354    | C | A | 2p11.1-2q11.1 | 6.21  |
| NW_001838799.1 | 50491    | C | T | 2q11.1        | 7.46  |
| NW_001838799.1 | 50628    | G | A | 2q11.2        | 6.65  |
| NW_001838799.1 | 51121    | G | T | 2q11.1        | 7.42  |
| NW_001838799.1 | 53707    | A | G | 2q11.1        | 14.5  |
| NW_001838806.2 | 59814    | T | C | 2q11.2        | 9.46  |
| NW_001838806.2 | 61471    | A | G | 2q11.1        | 8.16  |
| NW_001838806.2 | 61922    | C | T | 2p11.2        | 15.3  |
| NW_001838806.2 | 66245    | C | T | 2q12.1        | 6.26  |
| NW_001838806.2 | 66480    | C | T | 2q11.1        | 6.4   |
| NW_001838807.2 | 890181   | T | C | 2q21.2        | 6.52  |
| NW_001838807.2 | 901155   | G | A | 2q11.1        | 7.44  |
| NW_001838807.2 | 901980   | T | G | 2q11.2        | 6.08  |
| NW_001838807.2 | 902697   | A | C | 2p11.1-2q11.1 | 7.62  |
| NW_001838807.2 | 907398   | C | T | 2p11.2        | 12.61 |
| NW_001838807.2 | 907849   | T | C | 2q11.2        | 10.21 |
| NW_001838807.2 | 918742   | C | A | 2p11.2        | 14.18 |
| NW_001838807.2 | 925592   | A | G | 2q11.2        | 11.95 |
| NW_001838807.2 | 929132   | T | A | 2q11.2        | 9.75  |
| NW_001838807.2 | 930338   | T | C | 2q12.1        | 6.06  |
| NW_001838807.2 | 933521   | T | A | 2p11.2        | 12.7  |
| NW_001838807.2 | 943556   | A | T | 2q11.1        | 8.68  |
| NW_001838807.2 | 944217   | A | C | 2q12.1        | 6.3   |
| NW_001838847.2 | 6449069  | C | T | 2q14.1        | 6.85  |
| NW_001838860.1 | 8970302  | T | C | 2q24.1        | 10.86 |
| NW_001838867.2 | 1213     | C | T | 2q37.1        | 6.48  |
| NW_001838867.2 | 1423     | C | T | 2q37.1        | 11.3  |
| NW_001838876.2 | 10337238 | A | T | 3p26.3        | 7.05  |

|                |         |   |   |               |       |
|----------------|---------|---|---|---------------|-------|
| NW_001838877.2 | 8784814 | T | C | 3p14.3        | 7.51  |
| NW_001838877.2 | 8785696 | G | C | 3p14.3        | 7.21  |
| NW_001838877.2 | 8786851 | T | C | 3p14.3        | 6.65  |
| NW_001838877.2 | 8787573 | G | A | 3p14.3        | 7.07  |
| NW_001838877.2 | 8788438 | C | A | 3p14.3        | 6.14  |
| NW_001838877.2 | 8790336 | C | T | 3p14.3        | 7.87  |
| NW_001838877.2 | 8790894 | G | A | 3p14.3        | 7.74  |
| NW_001838877.2 | 8804294 | A | T | 3p14.3        | 7.63  |
| NW_001838877.2 | 8804364 | C | G | 3p14.3        | 7.22  |
| NW_001838877.2 | 8806953 | A | G | 3p14.3        | 8.11  |
| NW_001838877.2 | 8808868 | T | C | 3p14.3        | 11.77 |
| NW_001838877.2 | 8813600 | A | G | 3p14.3        | 7.84  |
| NW_001838877.2 | 8818914 | A | T | 3p14.3        | 8.53  |
| NW_001838877.2 | 8826843 | A | G | 3p14.3        | 8.75  |
| NW_001838879.1 | 3598632 | A | T | 3p11.1        | 6.46  |
| NW_001838879.1 | 3624286 | G | A | 3q11.2        | 12.7  |
| NW_001838879.1 | 3624827 | C | T | 3p11.1        | 8.93  |
| NW_001838879.1 | 3626994 | T | C | 3p11.1        | 9.43  |
| NW_001838879.1 | 3632739 | C | A | 3q11.2        | 14.76 |
| NW_001838879.1 | 3640894 | T | C | 3p11.1        | 6.21  |
| NW_001838879.1 | 3641063 | C | T | 3p11.1        | 7.58  |
| NW_001838879.1 | 3643901 | A | G | 3p12.1        | 6.17  |
| NW_001838879.1 | 3645079 | T | C | 3p12.1        | 8.14  |
| NW_001838879.1 | 3655172 | A | C | 3p11.1        | 7.55  |
| NW_001838879.1 | 3655275 | C | T | 3p11.1        | 6.28  |
| NW_001838879.1 | 3657792 | G | T | 3p11.1        | 6.81  |
| NW_001838879.1 | 3675028 | C | A | 3p12.1        | 6.79  |
| NW_001838879.1 | 3675512 | C | T | 3q11.2        | 11.9  |
| NW_001838879.1 | 3677048 | C | G | 3p11.1        | 8.6   |
| NW_001838879.1 | 3680625 | T | A | 3p11.1        | 8.26  |
| NW_001838879.1 | 3682164 | G | A | 3q11.2        | 7.04  |
| NW_001838879.1 | 3682773 | C | A | 3p11.1        | 8.96  |
| NW_001838879.1 | 3697955 | T | G | 3q11.2        | 8.27  |
| NW_001838879.1 | 3721236 | A | G | 3p12.1        | 6.6   |
| NW_001838879.1 | 3722301 | T | C | 3p12.1        | 8.09  |
| NW_001838879.1 | 3729845 | A | G | 3q11.2        | 6.95  |
| NW_001838879.1 | 3731854 | T | A | 3p11.1        | 8.26  |
| NW_001838879.1 | 3746373 | A | G | 3p11.1        | 7.65  |
| NW_001838879.1 | 3753082 | C | T | 3q11.2        | 8.71  |
| NW_001838879.1 | 3755215 | C | A | 3p11.1        | 6.5   |
| NW_001838879.1 | 3759634 | T | A | 3q11.1-3q11.2 | 10.09 |
| NW_001838879.1 | 3760297 | A | G | 3q11.1-3q11.2 | 8.29  |
| NW_001838879.1 | 3761928 | G | A | 3p11.1        | 10.04 |
| NW_001838879.1 | 3769146 | G | A | 3p11.1        | 10.41 |
| NW_001838879.1 | 3771519 | C | T | 3p11.1        | 8.91  |
| NW_001838879.1 | 3771559 | G | T | 3p11.1        | 7.61  |
| NW_001838879.1 | 3772756 | T | C | 3p12.1        | 6.69  |
| NW_001838879.1 | 3772959 | G | A | 3p12.1        | 7.52  |
| NW_001838879.1 | 3775287 | T | C | 3p11.1        | 17.34 |
| NW_001838879.1 | 3775374 | C | T | 3p11.1        | 6.3   |
| NW_001838879.1 | 3780395 | G | C | 3q11.2        | 7.34  |
| NW_001838879.1 | 3780564 | A | T | 3q11.2        | 6.73  |
| NW_001838879.1 | 3780809 | C | A | 3q11.2        | 6.84  |

|                |          |   |     |               |       |
|----------------|----------|---|-----|---------------|-------|
| NW_001838879.1 | 3782790  | T | C   | 3q11.2        | 7.54  |
| NW_001838879.1 | 3795234  | A | G   | 3q11.2        | 12.28 |
| NW_001838879.1 | 3795727  | G | A   | 3p11.1        | 11.56 |
| NW_001838879.1 | 3800359  | T | A   | 3p11.1        | 7.19  |
| NW_001838879.1 | 3803277  | C | T   | 3p11.1        | 9.13  |
| NW_001838879.1 | 3815877  | A | G   | 3p11.1        | 11.92 |
| NW_001838879.1 | 3817049  | C | T   | 3p12.1        | 9.41  |
| NW_001838879.1 | 3818880  | C | G   | 3p11.1        | 7.15  |
| NW_001838879.1 | 3826363  | C | G   | 3q11.2        | 14.97 |
| NW_001838879.1 | 3827534  | A | G   | 3p11.1        | 8.17  |
| NW_001838879.1 | 3828494  | C | G   | 3p11.1        | 8.32  |
| NW_001838879.1 | 3828784  | G | A   | 3p11.1        | 7.86  |
| NW_001838879.1 | 3830384  | C | A   | 3p12.1        | 8.82  |
| NW_001838879.1 | 3830894  | C | T   | 3p11.1        | 6.77  |
| NW_001838879.1 | 3832446  | C | T   | 3p12.1        | 8     |
| NW_001838879.1 | 3833517  | A | G   | 3p11.1        | 6.87  |
| NW_001838879.1 | 3834161  | C | T   | 3p11.1        | 9.35  |
| NW_001838879.1 | 3842662  | C | T   | 3p11.1        | 7.49  |
| NW_001838879.1 | 3848108  | G | A   | 3q11.2        | 17.01 |
| NW_001838879.1 | 3848950  | A | C   | 3p11.1        | 8.47  |
| NW_001838879.1 | 3850342  | C | T   | 3p11.1        | 7.01  |
| NW_001838879.1 | 3857475  | T | C   | 3p11.1        | 9.23  |
| NW_001838879.1 | 3859390  | T | C   | 3p11.1        | 7.59  |
| NW_001838879.1 | 3860340  | T | C   | 3p11.1        | 6.74  |
| NW_001838879.1 | 3862675  | A | G/T | 3p12.1        | 6.22  |
| NW_001838880.2 | 4914616  | T | C   | 3p12.1        | 6.36  |
| NW_001838880.2 | 4916821  | T | G   | 3p11.1        | 9.27  |
| NW_001838880.2 | 4947500  | G | A   | 3p11.1        | 9.71  |
| NW_001838880.2 | 4952415  | G | A   | 3q11.2        | 6.67  |
| NW_001838880.2 | 4982333  | T | C   | 3p11.1        | 9.73  |
| NW_001838880.2 | 4983955  | A | T   | 3p11.1        | 9.28  |
| NW_001838880.2 | 4984947  | G | A   | 3p12.1        | 10.88 |
| NW_001838880.2 | 4985071  | C | T   | 3p11.1        | 10.26 |
| NW_001838880.2 | 4985144  | A | G   | 3p11.1        | 7.7   |
| NW_001838881.2 | 17750504 | C | T   | 3q13.13       | 7.51  |
| NW_001838884.2 | 41426243 | T | C   | 3q25.2        | 6.33  |
| NW_001838884.2 | 41426333 | T | G   | 3q25.2        | 6.13  |
| NW_001838884.2 | 41426920 | C | T   | 3q25.2        | 6     |
| NW_001838889.1 | 1444606  | C | A   | 3q29          | 8.87  |
| NW_001838889.1 | 1521094  | G | C   | 3q29          | 6.91  |
| NW_001838901.1 | 699      | A | T   | 4p15.1        | 10.88 |
| NW_001838901.1 | 1175     | T | C   | 4p15.1        | 7.23  |
| NW_001838913.1 | 6161     | G | T   | 4q12          | 6.05  |
| NW_001838913.1 | 7093480  | A | G   | 4q13.1        | 6.48  |
| NW_001838915.1 | 920      | A | G   | 4q13.3        | 6.44  |
| NW_001838921.1 | 45009270 | A | G   | 4q35.1        | 8.26  |
| NW_001838921.1 | 50499068 | G | C   | 4q35.2        | 6.16  |
| NW_001838921.1 | 50499078 | C | A   | 4q35.2        | 6.56  |
| NW_001838926.1 | 3079960  | G | A   | 5p15.31       | 6.13  |
| NW_001838929.1 | 328729   | C | T   | 6p11.1-6q11.1 | 6.54  |
| NW_001838929.1 | 355752   | G | A   | 6q11.1        | 6.94  |
| NW_001838929.1 | 7540874  | G | A   | 5p13.3        | 6.6   |
| NW_001838933.1 | 10714827 | A | G   | 5p12          | 8.72  |

|                |          |   |     |               |       |
|----------------|----------|---|-----|---------------|-------|
| NW_001838933.1 | 10732443 | T | G   | 5p12          | 7.48  |
| NW_001838952.2 | 19400022 | A | G   | 5q23.2        | 7.72  |
| NW_001838952.2 | 26314704 | A | G   | 5q22.2        | 6.55  |
| NW_001838952.2 | 47120015 | A | G   | 5q14.3        | 6.32  |
| NW_001838952.2 | 47120602 | C | A   | 5q14.3        | 6.85  |
| NW_001838981.2 | 1242776  | C | T   | 6p12.1        | 15.03 |
| NW_001838981.2 | 6367218  | C | T   | 6p12.3        | 7.17  |
| NW_001838981.2 | 6375448  | T | G   | 6p12.3        | 6.48  |
| NW_001838981.2 | 6391334  | C | T   | 6p12.3        | 9.53  |
| NW_001838981.2 | 6397269  | A | G   | 6p12.3        | 7.24  |
| NW_001838981.2 | 6412211  | G | A   | 6p12.3        | 6.58  |
| NW_001838981.2 | 6421351  | T | G   | 6p12.3        | 6.57  |
| NW_001838981.2 | 6439242  | G | C   | 6p12.3        | 11.9  |
| NW_001838983.1 | 514154   | T | G   | 6q11.1-6q11.2 | 7.7   |
| NW_001838984.1 | 4735     | A | G   | 6q11.1        | 6.46  |
| NW_001838984.1 | 6406     | A | G   | 6p11.2        | 7.27  |
| NW_001838984.1 | 28672    | T | C   | 6p11.1        | 6.94  |
| NW_001838984.1 | 36886    | G | A   | 6q12          | 8.4   |
| NW_001838984.1 | 44037    | G | A   | 6q11.2        | 7.27  |
| NW_001838984.1 | 46371    | C | T   | 6p11.2        | 6.39  |
| NW_001838984.1 | 48092    | G | A   | 6p11.2        | 6.03  |
| NW_001838984.1 | 50468    | C | A   | 6p11.2        | 6.09  |
| NW_001838984.1 | 51452    | G | A   | 6p11.2        | 6.21  |
| NW_001838984.1 | 51740    | C | T   | 6p11.2        | 6.06  |
| NW_001838984.1 | 51800    | G | A   | 6q12          | 6.07  |
| NW_001838984.1 | 55658    | T | C   | 6p11.2        | 6.52  |
| NW_001838984.1 | 55731    | G | A   | 6p11.1        | 7.19  |
| NW_001838984.1 | 55734    | A | C/T | 6p11.1        | 7.29  |
| NW_001838984.1 | 62291    | C | T   | 6q11.1-6q11.2 | 14.7  |
| NW_001838984.1 | 82977    | C | T   | 6p11.2        | 6.14  |
| NW_001838984.1 | 116195   | A | G   | 6q11.2        | 6.89  |
| NW_001838984.1 | 118676   | T | G   | 6q11.2        | 7.25  |
| NW_001838984.1 | 122302   | T | A   | 6q11.1-6q11.2 | 15.86 |
| NW_001838984.1 | 123263   | T | A   | 6p11.2        | 6.72  |
| NW_001838984.1 | 134887   | G | T   | 6q11.1-6q11.2 | 6.86  |
| NW_001838984.1 | 183962   | T | C   | 6p12.1        | 6.54  |
| NW_001838984.1 | 185380   | C | T   | 6q12          | 17.34 |
| NW_001838984.1 | 196336   | A | C   | 6q11.1-6q11.2 | 8.07  |
| NW_001838984.1 | 204342   | T | C   | 6p11.1        | 7.04  |
| NW_001838984.1 | 235753   | T | A   | 6q11.1        | 6.18  |
| NW_001838984.1 | 250029   | G | C   | 6q11.1-6q11.2 | 7.63  |
| NW_001838984.1 | 294577   | A | G   | 6q11.1-6q11.2 | 8.27  |
| NW_001838984.1 | 306688   | A | G   | 6p11.2        | 6.03  |
| NW_001838984.1 | 309614   | C | G   | 6q12          | 7.95  |
| NW_001838984.1 | 313350   | A | T   | 6p12.1        | 6.67  |
| NW_001838984.1 | 1429158  | A | T   | 6q11.2        | 6.22  |
| NW_001838984.1 | 1430177  | T | G   | 6q12          | 6.34  |
| NW_001838984.1 | 1437937  | G | A   | 6p12.1        | 7.82  |
| NW_001838984.1 | 1469520  | G | T   | 6p11.1        | 6.04  |
| NW_001838984.1 | 1492470  | A | G   | 6p12.1        | 7.37  |
| NW_001838987.1 | 10011869 | C | T   | 6q14.1        | 6.16  |
| NW_001838987.1 | 25130122 | T | C   | 6q16.1        | 7.53  |
| NW_001838988.2 | 10918523 | T | A   | 6q16.1        | 10.96 |

|                |          |   |     |         |       |
|----------------|----------|---|-----|---------|-------|
| NW_001838990.2 | 50286365 | G | A   | 6q21    | 16.57 |
| NW_001838990.2 | 50286503 | G | A   | 6q21    | 6.15  |
| NW_001838990.2 | 50287137 | C | T   | 6q21    | 7.04  |
| NW_001838990.2 | 50288342 | C | T   | 6q21    | 12.78 |
| NW_001838990.2 | 50289094 | G | A   | 6q21    | 6.22  |
| NW_001838990.2 | 50289137 | G | A   | 6q21    | 7.19  |
| NW_001838990.2 | 50302379 | T | C   | 6q21    | 6.34  |
| NW_001838990.2 | 50303931 | A | G   | 6q21    | 6     |
| NW_001838990.2 | 50304596 | C | T   | 6q21    | 6.26  |
| NW_001838990.2 | 50305815 | G | A   | 6q21    | 11.12 |
| NW_001838990.2 | 50313433 | G | A   | 6q21    | 7.59  |
| NW_001838996.1 | 6315     | G | T   | 6q27    | 10.57 |
| NW_001838996.1 | 7162     | T | C   | 6q27    | 6.06  |
| NW_001838996.1 | 8468     | A | G   | 6q27    | 6.47  |
| NW_001838996.1 | 8598     | G | A   | 6q27    | 6.57  |
| NW_001838996.1 | 43963    | T | A   | 6q27    | 7.31  |
| NW_001838996.1 | 44607    | T | G   | 6q27    | 6.8   |
| NW_001838996.1 | 46063    | T | C   | 6q27    | 6.19  |
| NW_001839003.1 | 2067148  | G | A   | 7p21.3  | 7.05  |
| NW_001839003.1 | 8236903  | T | C   | 7p21.2  | 6.93  |
| NW_001839003.1 | 13247553 | A | C   | 7p21.1  | 6.72  |
| NW_001839018.1 | 105323   | A | G   | 7q11.22 | 6.93  |
| NW_001839018.1 | 124666   | G | A   | 7p12.1  | 6.47  |
| NW_001839018.1 | 140058   | C | T   | 7q11.22 | 6.55  |
| NW_001839018.1 | 160120   | G | A   | 7q11.22 | 6.07  |
| NW_001839018.1 | 175772   | A | T   | 7q11.21 | 6.46  |
| NW_001839018.1 | 175773   | T | G   | 7q11.21 | 6.48  |
| NW_001839023.2 | 16152    | C | T   | 7q11.21 | 8.62  |
| NW_001839023.2 | 17855    | A | C   | 7q11.22 | 10.89 |
| NW_001839023.2 | 21883    | C | A/T | 7q11.22 | 8.94  |
| NW_001839023.2 | 22561    | T | G   | 7q11.22 | 7.75  |
| NW_001839023.2 | 22953    | G | A   | 7q11.22 | 7.1   |
| NW_001839023.2 | 38227    | C | T   | 7q11.21 | 8.26  |
| NW_001839023.2 | 40061    | T | A   | 7q11.21 | 7.32  |
| NW_001839023.2 | 41572    | G | A   | 7q11.21 | 7.04  |
| NW_001839023.2 | 48354    | G | A   | 7p11.2  | 7.65  |
| NW_001839023.2 | 53943    | C | T   | 7q11.21 | 6.49  |
| NW_001839023.2 | 58518    | G | A   | 7q11.21 | 6.23  |
| NW_001839067.2 | 1526296  | A | G   | 7q21.3  | 7.42  |
| NW_001839071.2 | 1084545  | G | A   | 7q32.3  | 8.8   |
| NW_001839071.2 | 1086974  | T | C   | 7q32.2  | 7.72  |
| NW_001839071.2 | 1087569  | A | G   | 7q32.2  | 6.26  |
| NW_001839071.2 | 1088981  | T | C   | 7q32.2  | 9.98  |
| NW_001839071.2 | 1089653  | A | G   | 7q32.3  | 8.18  |
| NW_001839071.2 | 1090502  | T | A   | 7q32.2  | 8.18  |
| NW_001839071.2 | 1090780  | T | G   | 7q32.2  | 7.3   |
| NW_001839071.2 | 1093298  | C | T   | 7q32.3  | 8.41  |
| NW_001839071.2 | 1096131  | T | C   | 7q32.2  | 6.67  |
| NW_001839071.2 | 1097151  | A | C   | 7q32.3  | 9.11  |
| NW_001839071.2 | 1097878  | G | A   | 7q32.2  | 7.42  |
| NW_001839071.2 | 1100722  | G | A   | 7q32.1  | 6.49  |
| NW_001839071.2 | 1103782  | A | T   | 7q32.2  | 6.79  |
| NW_001839071.2 | 1104003  | C | A   | 7q32.2  | 7.29  |

|                |          |   |   |          |       |
|----------------|----------|---|---|----------|-------|
| NW_001839071.2 | 1105501  | T | C | 7q32.2   | 6.88  |
| NW_001839071.2 | 1107152  | G | A | 7q32.2   | 7.76  |
| NW_001839071.2 | 1108156  | A | T | 7q32.2   | 6.55  |
| NW_001839071.2 | 1108359  | C | T | 7q32.3   | 8.56  |
| NW_001839071.2 | 1109444  | C | T | 7q32.2   | 9.03  |
| NW_001839071.2 | 1109882  | A | G | 7q32.2   | 8.47  |
| NW_001839071.2 | 1115366  | A | G | 7q32.2   | 7.29  |
| NW_001839071.2 | 6410260  | C | A | 7q31.33  | 6.21  |
| NW_001839100.2 | 422649   | T | C | 7q36.3   | 6.15  |
| NW_001839139.2 | 2711499  | C | T | 8q24.23  | 6.62  |
| NW_001839139.2 | 2711546  | C | A | 8q24.22  | 6.3   |
| NW_001839139.2 | 2711639  | T | C | 8q24.23  | 8.67  |
| NW_001839139.2 | 2712311  | C | T | 8q24.23  | 6.62  |
| NW_001839139.2 | 2712583  | A | G | 8q24.23  | 7.25  |
| NW_001839139.2 | 2712606  | C | T | 8q24.23  | 6.5   |
| NW_001839139.2 | 2712675  | A | G | 8q24.23  | 7.39  |
| NW_001839139.2 | 2712933  | T | C | 8q24.23  | 7.13  |
| NW_001839142.2 | 959500   | C | T | 8q24.3   | 6.98  |
| NW_001839142.2 | 959517   | T | C | 8q24.3   | 7.29  |
| NW_001839142.2 | 1065113  | C | G | 8q24.3   | 6.74  |
| NW_001839142.2 | 1065260  | C | G | 8q24.3   | 8.73  |
| NW_001839149.2 | 29185249 | A | T | 9p24.1   | 10.05 |
| NW_001839149.2 | 29186013 | C | A | 9p24.1   | 7.29  |
| NW_001839149.2 | 29186017 | G | C | 9p24.1   | 8.12  |
| NW_001839149.2 | 29186124 | T | A | 9p24.1   | 10.71 |
| NW_001839181.1 | 46797    | T | A | 9q21.13  | 7.13  |
| NW_001839181.1 | 72266    | C | A | 9q21.12  | 6.65  |
| NW_001839181.1 | 104472   | T | C | 9q21.12  | 7.04  |
| NW_001839181.1 | 110432   | G | C | 9p13.1   | 6.77  |
| NW_001839181.1 | 283111   | G | T | 9q21.11  | 6.68  |
| NW_001839181.1 | 318693   | G | A | 9q21.11  | 6.42  |
| NW_001839219.2 | 8184     | G | A | 9q21.12  | 6.9   |
| NW_001839221.1 | 6580725  | C | T | 9q21.13  | 11.61 |
| NW_001839223.1 | 801749   | A | C | 9q22.1   | 6.18  |
| NW_001837937.2 | 44355    | C | T | 10p11.21 | 6.54  |
| NW_001837937.2 | 48723    | T | A | 10p11.21 | 7.09  |
| NW_001837937.2 | 49819    | A | C | 10q11.21 | 6.74  |
| NW_001837939.1 | 21607    | C | T | 10p11.21 | 6.25  |
| NW_001837986.1 | 9547421  | T | C | 10q21.3  | 6.64  |
| NW_001837986.1 | 12703240 | C | T | 10q21.3  | 13.57 |
| NW_001837986.1 | 12704414 | T | A | 10q21.3  | 12.37 |
| NW_001837986.1 | 12705245 | A | G | 10q21.3  | 11.03 |
| NW_001837986.1 | 12706415 | G | A | 10q21.3  | 9     |
| NW_001837986.1 | 12707208 | T | C | 10q21.3  | 7.73  |
| NW_001837992.1 | 1910417  | G | C | 10q23.2  | 8.02  |
| NW_001837992.1 | 1910562  | T | C | 10q23.2  | 8.59  |
| NW_001838006.2 | 3696178  | A | C | 10q26.11 | 7.12  |
| NW_001838009.1 | 1030     | G | C | 10q26.13 | 7.32  |
| NW_001838009.1 | 1468     | G | A | 10q26.13 | 8.12  |
| NW_001838009.1 | 1473     | C | A | 10q26.13 | 8.19  |
| NW_001838009.1 | 2136     | T | C | 10q26.13 | 6.09  |
| NW_001838009.1 | 4437     | C | T | 10q26.13 | 7.2   |
| NW_001838009.1 | 13074    | G | C | 10q26.13 | 7.98  |

|                |          |   |     |                  |       |
|----------------|----------|---|-----|------------------|-------|
| NW_001838009.1 | 25674    | G | T   | 10q26.13         | 6.89  |
| NW_001838009.1 | 29388    | T | C   | 10q26.13         | 6.55  |
| NW_001838009.1 | 29393    | C | T   | 10q26.13         | 6.15  |
| NW_001838009.1 | 35648    | A | G   | 10q26.13         | 7.69  |
| NW_001838009.1 | 41798    | C | T   | 10q26.2          | 6.07  |
| NW_001838009.1 | 42067    | A | G   | 10q26.13         | 6.05  |
| NW_001838009.1 | 44928    | A | C   | 10q26.2          | 6.07  |
| NW_001838009.1 | 54164    | A | G   | 10q26.13         | 6.54  |
| NW_001838009.1 | 55892    | A | G   | 10q26.13         | 6.52  |
| NW_001838009.1 | 56362    | T | G   | 10q26.13         | 12.61 |
| NW_001838009.1 | 56617    | T | C   | 10q26.13         | 9.82  |
| NW_001838009.1 | 57361    | T | C   | 10q26.13         | 10.36 |
| NW_001838009.1 | 57509    | G | T   | 10q26.13         | 6.44  |
| NW_001838009.1 | 58194    | T | C   | 10q26.13         | 6.72  |
| NW_001838009.1 | 58398    | A | G   | 10q26.13         | 11.3  |
| NW_001838009.1 | 61252    | A | G   | 10q26.13         | 6.96  |
| NW_001838009.1 | 61839    | G | A   | 10q26.13         | 6.92  |
| NW_001838009.1 | 64101    | G | A   | 10q26.2          | 6.01  |
| NW_001838009.1 | 64928    | G | A   | 10q26.13         | 7.85  |
| NW_001838009.1 | 66979    | C | G   | 10q26.2          | 6.62  |
| NW_001838009.1 | 67903    | A | G   | 10q26.13         | 7.18  |
| NW_001838012.1 | 386031   | C | T   | 10q26.3          | 7.48  |
| NW_001838012.1 | 386100   | T | A   | 10q26.3          | 9.28  |
| NW_001838012.1 | 386182   | G | C   | 10q26.3          | 9.25  |
| NW_001838012.1 | 386269   | C | T   | 10q26.3          | 7.2   |
| NW_001838012.1 | 386633   | T | C   | 10q26.3          | 7.96  |
| NW_001838012.1 | 387022   | C | T   | 10q26.3          | 7.94  |
| NW_001838012.1 | 387050   | G | C/T | 10q26.3          | 8.08  |
| NW_001838014.1 | 250161   | T | C   | 10q26.3          | 19.86 |
| NW_001838014.1 | 251895   | G | A   | 10q26.3          | 6.02  |
| NW_001838014.1 | 257817   | A | G   | 10q26.3          | 6.93  |
| NW_001838014.1 | 266873   | A | C   | 10q26.3          | 6.19  |
| NW_001838016.1 | 665750   | T | C   | 11p15.5          | 8.52  |
| NW_001838016.1 | 824045   | G | A   | 11p15.5          | 7.77  |
| NW_001838022.2 | 35667    | C | T   | 11q12.1          | 7.2   |
| NW_001838022.2 | 2993705  | G | A   | 11p11.2          | 8.56  |
| NW_001838022.2 | 36755893 | A | C   | 11p15.2          | 8.39  |
| NW_001838025.2 | 1460472  | G | A   | 11q13.3          | 7.43  |
| NW_001838027.1 | 1045907  | G | A   | 11q13.3          | 7.47  |
| NW_001838028.2 | 16885017 | G | T   | 11q13.4          | 12.49 |
| NW_001838042.2 | 24326225 | T | C   | 11q21            | 7.07  |
| NW_001838042.2 | 28536808 | C | A   | 11q21            | 10.7  |
| NW_001838050.1 | 822279   | C | A   | 12p13.31         | 6.71  |
| NW_001838050.1 | 1412114  | G | A   | 12p13.31         | 8.02  |
| NW_001838055.2 | 1198     | C | G   | 12q12            | 6.92  |
| NW_001838055.2 | 1259     | G | C   | 12q12            | 9.18  |
| NW_001838055.2 | 1359     | C | A   | 12p11.21         | 7.54  |
| NW_001838055.2 | 1385     | G | C   | 12q12            | 8.32  |
| NW_001838055.2 | 1530     | T | C   | 12q12            | 6.36  |
| NW_001838055.2 | 29868    | G | A   | 12q12            | 6.47  |
| NW_001838055.2 | 30038    | C | G   | 12p11.21         | 9.72  |
| NW_001838055.2 | 30385    | T | A   | 12p11.21-12p11.1 | 6.01  |
| NW_001838055.2 | 30691    | G | C   | 12p11.21         | 11.35 |

|                |       |   |     |                  |       |
|----------------|-------|---|-----|------------------|-------|
| NW_001838055.2 | 31230 | T | G   | 12p11.1          | 10.13 |
| NW_001838055.2 | 31237 | G | A   | 12q12            | 8.78  |
| NW_001838055.2 | 31428 | G | A   | 12q12            | 13.02 |
| NW_001838055.2 | 31721 | C | T   | 12q12            | 12.46 |
| NW_001838055.2 | 31790 | C | T   | 12q12            | 13.1  |
| NW_001838055.2 | 31842 | C | G   | 12q12            | 13.01 |
| NW_001838055.2 | 32095 | C | A   | 12q12            | 14.65 |
| NW_001838055.2 | 32497 | C | A   | 12q12            | 13.34 |
| NW_001838055.2 | 32510 | G | A   | 12q12            | 13.7  |
| NW_001838055.2 | 32737 | C | T   | 12q11            | 6.36  |
| NW_001838055.2 | 32963 | T | A   | 12p11.1          | 9.18  |
| NW_001838055.2 | 33219 | A | C   | 12q12            | 12.01 |
| NW_001838055.2 | 33282 | T | A   | 12p11.1          | 7.01  |
| NW_001838055.2 | 33321 | T | A   | 12q12            | 9.24  |
| NW_001838055.2 | 33821 | G | T   | 12q12            | 12    |
| NW_001838055.2 | 33970 | T | C   | 12q12            | 8.78  |
| NW_001838056.1 | 12043 | T | G   | 12q12            | 7.01  |
| NW_001838056.1 | 12236 | T | A   | 12p11.21         | 6.8   |
| NW_001838056.1 | 12753 | C | T   | 12q12            | 9.71  |
| NW_001838056.1 | 12793 | T | C   | 12q12            | 8.41  |
| NW_001838056.1 | 12985 | A | T   | 12q12            | 6.08  |
| NW_001838056.1 | 13382 | G | A   | 12q12            | 8.98  |
| NW_001838056.1 | 13452 | T | A   | 12q11            | 7.09  |
| NW_001838056.1 | 13580 | C | A   | 12p11.1          | 6.38  |
| NW_001838056.1 | 13745 | G | C   | 12q11            | 7.76  |
| NW_001838056.1 | 13981 | C | T   | 12q12            | 6.45  |
| NW_001838056.1 | 14033 | A | C   | 12q12            | 8.04  |
| NW_001838056.1 | 14200 | C | T   | 12q12            | 6.07  |
| NW_001838056.1 | 14479 | G | T   | 12q12            | 9.71  |
| NW_001838056.1 | 16377 | G | T   | 12q12            | 7.35  |
| NW_001838056.1 | 16654 | C | G   | 12q12            | 8.8   |
| NW_001838056.1 | 16968 | C | T   | 12p11.21-12p11.1 | 6.75  |
| NW_001838056.1 | 18422 | A | T   | 12q12            | 17.13 |
| NW_001838056.1 | 22738 | C | T   | 12q12            | 9.43  |
| NW_001838056.1 | 22818 | T | A   | 12q12            | 7.71  |
| NW_001838056.1 | 23146 | G | C   | 12q12            | 13.95 |
| NW_001838056.1 | 24112 | C | G   | 12q12            | 16.67 |
| NW_001838056.1 | 24605 | G | A   | 12q12            | 10.23 |
| NW_001838056.1 | 26317 | A | C   | 12p11.21-12p11.1 | 6.12  |
| NW_001838056.1 | 43215 | G | A/T | 12q12            | 10.55 |
| NW_001838056.1 | 43311 | C | T   | 12q12            | 13.56 |
| NW_001838056.1 | 46666 | G | A   | 12p11.21-12p11.1 | 10.08 |
| NW_001838056.1 | 46790 | A | T   | 12q11            | 7.22  |
| NW_001838056.1 | 48386 | T | A   | 12q12            | 14.28 |
| NW_001838056.1 | 54964 | C | T   | 12p11.21-12p11.1 | 6.01  |
| NW_001838056.1 | 55086 | C | T   | 12q12            | 15.1  |
| NW_001838056.1 | 55464 | G | A   | 12q12            | 11.68 |
| NW_001838056.1 | 56060 | G | A   | 12q12            | 14.22 |
| NW_001838056.1 | 59035 | C | A   | 12q12            | 13.94 |
| NW_001838056.1 | 59648 | C | T   | 12q12            | 6.99  |
| NW_001838056.1 | 63229 | G | A   | 12q12            | 13.32 |
| NW_001838056.1 | 64311 | G | T   | 12p11.21-12p11.1 | 9.28  |
| NW_001838056.1 | 71020 | G | T   | 12q12            | 10.34 |



|                |        |   |     |                  |       |
|----------------|--------|---|-----|------------------|-------|
| NW_001838056.1 | 73944  | G | C   | 12q12            | 8.11  |
| NW_001838056.1 | 74376  | C | T   | 12q12            | 9.75  |
| NW_001838056.1 | 77222  | C | T   | 12q12            | 8.5   |
| NW_001838056.1 | 77373  | C | T   | 12p11.21-12p11.1 | 6.09  |
| NW_001838056.1 | 79917  | G | A   | 12q12            | 13.31 |
| NW_001838056.1 | 81899  | T | C   | 12q12            | 16.03 |
| NW_001838056.1 | 81911  | G | A   | 12q12            | 16    |
| NW_001838056.1 | 82645  | C | T   | 12q12            | 14.05 |
| NW_001838056.1 | 83841  | C | T   | 12q12            | 16.27 |
| NW_001838056.1 | 85957  | T | C   | 12q12            | 14.89 |
| NW_001838056.1 | 86227  | C | G   | 12q12            | 11.01 |
| NW_001838056.1 | 87415  | A | T   | 12q12            | 14.16 |
| NW_001838056.1 | 87973  | A | G   | 12q12            | 6.4   |
| NW_001838056.1 | 88640  | G | A   | 12q12            | 14.37 |
| NW_001838056.1 | 89535  | A | C   | 12q12            | 6.75  |
| NW_001838056.1 | 90631  | C | A/T | 12q12            | 11.17 |
| NW_001838056.1 | 91203  | C | A   | 12q12            | 17.48 |
| NW_001838056.1 | 91686  | G | A   | 12p11.21-12p11.1 | 8.48  |
| NW_001838056.1 | 94294  | C | A   | 12p11.21-12p11.1 | 7.14  |
| NW_001838056.1 | 95020  | C | A   | 12q12            | 9.76  |
| NW_001838056.1 | 104614 | A | T   | 12q12            | 8.14  |
| NW_001838056.1 | 107203 | T | C   | 12q12            | 9.39  |
| NW_001838056.1 | 107349 | T | C   | 12q12            | 14.11 |
| NW_001838056.1 | 109115 | C | T   | 12p11.21-12p11.1 | 6.54  |
| NW_001838056.1 | 109365 | G | A   | 12q12            | 8.67  |
| NW_001838056.1 | 110804 | A | G   | 12q12            | 16.46 |
| NW_001838056.1 | 111688 | T | A   | 12q12            | 15.77 |
| NW_001838056.1 | 112233 | G | C   | 12q12            | 7.18  |
| NW_001838056.1 | 112669 | A | G   | 12q12            | 9.3   |
| NW_001838056.1 | 114545 | T | C   | 12q11            | 6.87  |
| NW_001838056.1 | 114806 | T | C   | 12q12            | 6.24  |
| NW_001838056.1 | 116954 | G | T   | 12p11.21-12p11.1 | 6.04  |
| NW_001838056.1 | 117840 | C | T   | 12p11.21-12p11.1 | 6.02  |
| NW_001838056.1 | 118588 | G | A   | 12q11            | 6.34  |
| NW_001838056.1 | 119024 | C | T   | 12p11.21-12p11.1 | 8.72  |
| NW_001838056.1 | 122837 | A | G   | 12q12            | 12.28 |
| NW_001838056.1 | 122996 | C | T   | 12p11.21-12p11.1 | 6.58  |
| NW_001838056.1 | 124948 | C | T   | 12q12            | 15.89 |
| NW_001838056.1 | 125229 | C | A   | 12q12            | 14.87 |
| NW_001838056.1 | 127676 | G | A   | 12q12            | 15.89 |
| NW_001838056.1 | 129712 | C | T   | 12q12            | 15.67 |
| NW_001838056.1 | 130407 | A | T   | 12q12            | 7.53  |
| NW_001838056.1 | 132727 | T | G   | 12q12            | 8.5   |
| NW_001838056.1 | 136237 | C | G   | 12q12            | 11.44 |
| NW_001838056.1 | 138222 | C | T   | 12p11.1          | 6.08  |
| NW_001838056.1 | 138785 | T | C   | 12p11.21-12p11.1 | 6.54  |
| NW_001838056.1 | 139047 | A | C/G | 12q12            | 11.61 |
| NW_001838056.1 | 142958 | C | T   | 12q12            | 16.76 |
| NW_001838056.1 | 149210 | C | T   | 12q12            | 16.36 |
| NW_001838056.1 | 150427 | C | T   | 12q12            | 9.55  |
| NW_001838056.1 | 153371 | A | C   | 12p11.21-12p11.1 | 6.47  |
| NW_001838056.1 | 153898 | T | A   | 12q12            | 6.8   |
| NW_001838056.1 | 153906 | C | G   | 12q12            | 6.82  |

|                |         |   |   |                  |       |
|----------------|---------|---|---|------------------|-------|
| NW_001838056.1 | 157186  | G | C | 12q12            | 15.34 |
| NW_001838056.1 | 157897  | G | A | 12q12            | 11.04 |
| NW_001838056.1 | 160556  | A | T | 12q12            | 8.82  |
| NW_001838056.1 | 163558  | T | A | 12q12            | 10.65 |
| NW_001838056.1 | 166938  | C | T | 12q12            | 14.77 |
| NW_001838056.1 | 168230  | T | G | 12q12            | 15.55 |
| NW_001838056.1 | 169219  | T | C | 12q12            | 16.53 |
| NW_001838056.1 | 170246  | G | A | 12q11            | 6.16  |
| NW_001838056.1 | 170544  | C | T | 12q12            | 15.8  |
| NW_001838056.1 | 171013  | A | C | 12q12            | 8.63  |
| NW_001838056.1 | 171641  | G | A | 12p11.21-12p11.1 | 6.47  |
| NW_001838056.1 | 171994  | A | G | 12p11.21-12p11.1 | 6.1   |
| NW_001838056.1 | 173469  | T | G | 12p11.21-12p11.1 | 6.31  |
| NW_001838056.1 | 180160  | A | C | 12p11.21-12p11.1 | 6.19  |
| NW_001838056.1 | 180171  | A | C | 12p11.21-12p11.1 | 6.16  |
| NW_001838056.1 | 180389  | A | G | 12q12            | 11.98 |
| NW_001838056.1 | 182710  | C | G | 12q12            | 14.54 |
| NW_001838056.1 | 183018  | G | T | 12q12            | 8.86  |
| NW_001838056.1 | 184347  | C | G | 12q12            | 12.31 |
| NW_001838056.1 | 185072  | A | G | 12q11            | 7.03  |
| NW_001838056.1 | 190663  | C | A | 12q11            | 6.77  |
| NW_001838056.1 | 191078  | T | C | 12q12            | 12.79 |
| NW_001838056.1 | 191206  | G | T | 12p11.21-12p11.1 | 6.52  |
| NW_001838056.1 | 194077  | G | A | 12q12            | 10.52 |
| NW_001838056.1 | 194368  | C | A | 12p11.1          | 7.11  |
| NW_001838056.1 | 197838  | G | C | 12q12            | 8.21  |
| NW_001838056.1 | 199786  | C | T | 12q12            | 13.56 |
| NW_001838056.1 | 209122  | A | T | 12q12            | 13.79 |
| NW_001838056.1 | 212650  | T | C | 12q12            | 7.13  |
| NW_001838056.1 | 215409  | T | C | 12q12            | 8.59  |
| NW_001838056.1 | 218766  | A | C | 12q12            | 15.49 |
| NW_001838056.1 | 224353  | A | G | 12q12            | 7.04  |
| NW_001838056.1 | 227504  | A | G | 12q12            | 6.78  |
| NW_001838056.1 | 503985  | C | T | 12q12            | 6.55  |
| NW_001838056.1 | 504694  | C | T | 12q12            | 6.47  |
| NW_001838056.1 | 505248  | T | G | 12p11.21         | 8.08  |
| NW_001838056.1 | 505278  | A | T | 12q11            | 6.09  |
| NW_001838061.2 | 403903  | G | T | 12q23.3          | 7.59  |
| NW_001838061.2 | 1067565 | C | A | 12q23.3          | 7.18  |
| NW_001838061.2 | 1070374 | A | G | 12q23.3          | 10.22 |
| NW_001838069.1 | 4390161 | A | G | 13q12.12         | 9.35  |
| NW_001838069.1 | 4390287 | A | G | 13q12.12         | 7.27  |
| NW_001838069.1 | 4391373 | A | G | 13q12.12         | 7.28  |
| NW_001838069.1 | 4391781 | G | T | 13q12.12         | 6.23  |
| NW_001838069.1 | 4391794 | C | T | 13q12.12         | 7.38  |
| NW_001838069.1 | 4391847 | A | C | 13q12.12         | 7.12  |
| NW_001838069.1 | 4392826 | T | C | 13q12.12         | 7.18  |
| NW_001838084.2 | 3016983 | A | C | 13q33.3          | 6.46  |
| NW_001838112.2 | 402737  | A | G | 14q24.2          | 6.06  |
| NW_001838115.2 | 3275907 | A | T | 14q32.2-14q32.31 | 7.94  |
| NW_001838115.2 | 3275984 | C | T | 14q32.2-14q32.31 | 7.52  |
| NW_001838199.1 | 647070  | G | A | 15q13.1          | 8.83  |
| NW_001838285.2 | 7459    | C | G | 16p11.2          | 8.88  |

|                |         |   |     |                 |       |
|----------------|---------|---|-----|-----------------|-------|
| NW_001838285.2 | 8114    | G | A   | 16q11.2         | 11.61 |
| NW_001838285.2 | 12391   | G | C   | 16q12.1         | 7.35  |
| NW_001838285.2 | 18336   | A | G   | 16q12.1         | 8.34  |
| NW_001838285.2 | 22922   | T | G   | 16q11.2-16q12.1 | 6.27  |
| NW_001838285.2 | 30974   | G | C   | 16p11.2         | 6.81  |
| NW_001838286.2 | 2265    | C | G   | 16q12.1         | 7.81  |
| NW_001838286.2 | 2644    | C | G   | 16q12.1         | 9.82  |
| NW_001838286.2 | 11593   | A | C/T | 16q11.2-16q12.1 | 7.33  |
| NW_001838286.2 | 12032   | T | C/G | 16q12.1         | 10.63 |
| NW_001838286.2 | 12313   | C | T   | 16q11.2-16q12.1 | 7.28  |
| NW_001838286.2 | 18923   | A | G   | 16q12.1         | 7.55  |
| NW_001838286.2 | 20028   | A | T   | 16q12.1         | 11.15 |
| NW_001838286.2 | 22406   | A | G   | 16q12.1         | 10.73 |
| NW_001838286.2 | 86716   | G | A   | 16q12.1         | 6.5   |
| NW_001838286.2 | 87835   | T | C   | 16p12.1         | 6.46  |
| NW_001838286.2 | 89056   | T | C   | 16q12.1         | 11.39 |
| NW_001838286.2 | 96543   | A | G   | 16p11.2         | 10.94 |
| NW_001838286.2 | 104250  | A | C   | 16p11.2         | 6.07  |
| NW_001838286.2 | 119392  | A | G   | 16q12.1         | 6.39  |
| NW_001838286.2 | 124475  | C | T   | 16q12.1         | 12.12 |
| NW_001838286.2 | 158754  | A | G   | 16q12.1         | 8.89  |
| NW_001838286.2 | 162530  | G | C   | 16p11.2         | 6.3   |
| NW_001838286.2 | 163313  | A | T   | 16q12.1         | 8.56  |
| NW_001838286.2 | 167382  | T | C   | 16p11.2         | 8.58  |
| NW_001838286.2 | 173664  | A | G   | 16q12.1         | 7.07  |
| NW_001838286.2 | 1453120 | C | G   | 16q12.1         | 6.16  |
| NW_001838286.2 | 1472297 | A | C   | 16q12.1         | 6.04  |
| NW_001838286.2 | 1474083 | T | C   | 16q11.2         | 8.54  |
| NW_001838286.2 | 1479326 | G | A/T | 16q12.1         | 7.29  |
| NW_001838286.2 | 1481201 | C | A   | 16q12.1         | 8.61  |
| NW_001838286.2 | 1484633 | T | A   | 16q12.1         | 6.03  |
| NW_001838286.2 | 1487760 | G | C   | 16q12.1         | 6.77  |
| NW_001838286.2 | 1491725 | A | G   | 16q11.2-16q12.1 | 8.59  |
| NW_001838286.2 | 1497309 | G | A   | 16q11.2-16q12.1 | 7.64  |
| NW_001838286.2 | 1501620 | T | C   | 16q12.1         | 10.46 |
| NW_001838286.2 | 1502457 | T | C   | 16q12.1         | 6.47  |
| NW_001838286.2 | 1505481 | T | C   | 16q12.1         | 6.43  |
| NW_001838286.2 | 1555385 | G | A   | 16q11.2-16q12.1 | 6.46  |
| NW_001838286.2 | 1560151 | A | G   | 16p11.1-16q11.2 | 6.13  |
| NW_001838286.2 | 1561727 | G | A   | 16q12.1         | 7.68  |
| NW_001838286.2 | 1569832 | A | G   | 16q12.1         | 8.96  |
| NW_001838286.2 | 1572552 | T | C   | 16q12.1         | 9.43  |
| NW_001838286.2 | 1574492 | T | A   | 16q12.1         | 6.23  |
| NW_001838286.2 | 1574722 | G | A   | 16q12.1         | 10.26 |
| NW_001838286.2 | 1576930 | T | C   | 16q12.1         | 10.44 |
| NW_001838286.2 | 1594533 | T | A   | 16q12.1         | 8.41  |
| NW_001838286.2 | 1594673 | A | T   | 16q12.1         | 6.07  |
| NW_001838286.2 | 1597656 | C | T   | 16q12.1         | 9.16  |
| NW_001838286.2 | 1600843 | G | A   | 16q12.1         | 10.55 |
| NW_001838286.2 | 1615732 | G | A   | 16q12.1         | 6.59  |
| NW_001838286.2 | 1622071 | A | C   | 16q12.1         | 7.53  |
| NW_001838286.2 | 1622393 | G | T   | 16q12.1         | 8.72  |
| NW_001838286.2 | 1626605 | C | G   | 16q12.1         | 8.44  |

|                |         |   |     |          |       |
|----------------|---------|---|-----|----------|-------|
| NW_001838286.2 | 1629663 | T | C   | 16q12.1  | 9.26  |
| NW_001838286.2 | 1630332 | A | G   | 16q12.1  | 9.79  |
| NW_001838286.2 | 1630626 | T | A   | 16q12.1  | 10.97 |
| NW_001838286.2 | 1632678 | T | C   | 16q12.1  | 6.91  |
| NW_001838286.2 | 1638253 | T | A   | 16q12.1  | 6.45  |
| NW_001838286.2 | 1640963 | T | A   | 16q12.1  | 8.53  |
| NW_001838286.2 | 1641058 | A | G   | 16q12.1  | 6.02  |
| NW_001838286.2 | 1648188 | A | G   | 16q12.1  | 6.05  |
| NW_001838286.2 | 1648847 | C | A/T | 16q12.1  | 7.12  |
| NW_001838286.2 | 1650292 | A | T   | 16q12.1  | 6.17  |
| NW_001838286.2 | 1650371 | G | A   | 16q12.1  | 6.37  |
| NW_001838286.2 | 1653778 | T | C   | 16q12.1  | 8.89  |
| NW_001838286.2 | 1658177 | A | G   | 16q12.1  | 8.77  |
| NW_001838286.2 | 1660758 | A | C   | 16q12.1  | 8.13  |
| NW_001838286.2 | 1663950 | G | A   | 16q12.1  | 7.25  |
| NW_001838286.2 | 1677899 | G | A   | 16q12.1  | 9.49  |
| NW_001838286.2 | 1684700 | A | T   | 16q12.1  | 6.23  |
| NW_001838286.2 | 1687548 | G | A   | 16q12.1  | 10.36 |
| NW_001838286.2 | 1688066 | T | A   | 16q12.1  | 6.4   |
| NW_001838286.2 | 1688559 | G | A   | 16q12.1  | 8.91  |
| NW_001838286.2 | 1690501 | C | A   | 16q12.1  | 7.44  |
| NW_001838286.2 | 1691303 | G | A   | 16q12.1  | 8.34  |
| NW_001838286.2 | 1693540 | T | C   | 16q12.1  | 6.92  |
| NW_001838286.2 | 1693703 | G | A   | 16q12.1  | 8.19  |
| NW_001838286.2 | 1694643 | T | G   | 16q12.1  | 6.89  |
| NW_001838286.2 | 1704238 | A | G   | 16q12.1  | 6.91  |
| NW_001838286.2 | 1707235 | A | T   | 16q12.1  | 6.2   |
| NW_001838286.2 | 1707908 | C | T   | 16q12.1  | 6.32  |
| NW_001838286.2 | 1708438 | A | G   | 16q12.1  | 9.45  |
| NW_001838286.2 | 1709060 | A | T   | 16q12.1  | 6.42  |
| NW_001838286.2 | 1711158 | A | T   | 16q12.1  | 8.22  |
| NW_001838286.2 | 1715491 | C | G   | 16q12.1  | 6.24  |
| NW_001838286.2 | 1719611 | G | A   | 16q12.1  | 8.66  |
| NW_001838286.2 | 1720982 | G | A   | 16q12.1  | 6.08  |
| NW_001838286.2 | 1721112 | G | A   | 16q12.1  | 10.43 |
| NW_001838329.1 | 1461144 | C | G   | 16q24.1  | 6.45  |
| NW_001838403.1 | 653     | T | G   | 17p13.3  | 11.33 |
| NW_001838403.1 | 1436    | T | C   | 17p13.3  | 9.22  |
| NW_001838403.1 | 1664    | C | G   | 17p13.3  | 7.85  |
| NW_001838403.1 | 1678    | G | C   | 17p13.3  | 7.71  |
| NW_001838429.2 | 624413  | G | A   | 17q11.2  | 6.09  |
| NW_001838429.2 | 627504  | G | A   | 17p11.2  | 6.62  |
| NW_001838429.2 | 643035  | A | G   | 17p11.2  | 6.41  |
| NW_001838429.2 | 643749  | C | A   | 17p11.2  | 7.03  |
| NW_001838429.2 | 658725  | G | A   | 17p11.2  | 7.14  |
| NW_001838429.2 | 669321  | T | A   | 17p11.2  | 7.21  |
| NW_001838456.2 | 437603  | G | A   | 17q25.3  | 6.22  |
| NW_001838456.2 | 438003  | C | T   | 17q25.3  | 7.87  |
| NW_001838456.2 | 441551  | A | G   | 17q25.3  | 6.23  |
| NW_001838458.1 | 511659  | T | A   | 17q25.3  | 8.97  |
| NW_001838466.2 | 9166    | T | G   | 18p11.21 | 8.43  |
| NW_001838466.2 | 9332    | C | G   | 18p11.21 | 11.67 |
| NW_001838466.2 | 9393    | A | G   | 18p11.21 | 11.96 |

|                |          |   |     |                  |       |
|----------------|----------|---|-----|------------------|-------|
| NW_001838466.2 | 9806     | G | T   | 18p11.21         | 9.16  |
| NW_001838466.2 | 9836     | A | G   | 18p11.21         | 11.13 |
| NW_001838466.2 | 10507    | G | T   | 18p11.21         | 11.34 |
| NW_001838466.2 | 10749    | T | G   | 18p11.21         | 13.7  |
| NW_001838466.2 | 10764    | T | A   | 18p11.21         | 15.19 |
| NW_001838466.2 | 10780    | T | G   | 18p11.21         | 12.63 |
| NW_001838466.2 | 10876    | A | G   | 18p11.21         | 11.87 |
| NW_001838466.2 | 11063    | A | G   | 18p11.21         | 13.1  |
| NW_001838466.2 | 11142    | C | A   | 18p11.21         | 14.56 |
| NW_001838466.2 | 11202    | T | A   | 18p11.21-18q11.1 | 6.95  |
| NW_001838466.2 | 11898    | A | G   | 18p11.21         | 14.24 |
| NW_001838466.2 | 12046    | T | C   | 18q11.2          | 14.35 |
| NW_001838466.2 | 13688    | T | C   | 18q11.1          | 11.15 |
| NW_001838466.2 | 13927    | C | T   | 18q11.2          | 6.27  |
| NW_001838466.2 | 13954    | C | T   | 18p11.21         | 8.32  |
| NW_001838466.2 | 14396    | C | T   | 18p11.21         | 14.65 |
| NW_001838466.2 | 15197    | T | C   | 18q11.2          | 6.3   |
| NW_001838466.2 | 15257    | A | G   | 18p11.21         | 8.2   |
| NW_001838466.2 | 16142    | A | T   | 18q11.2          | 7.55  |
| NW_001838466.2 | 16732    | T | G   | 18q11.2          | 9.31  |
| NW_001838466.2 | 17339    | G | C   | 18q11.2          | 11.47 |
| NW_001838466.2 | 17367    | G | C   | 18q11.1          | 9.9   |
| NW_001838466.2 | 18821    | C | G   | 18p11.21         | 13.81 |
| NW_001838466.2 | 19565    | A | C   | 18p11.21         | 10.65 |
| NW_001838466.2 | 21840    | G | A   | 18q11.1          | 7.95  |
| NW_001838466.2 | 22320    | C | G   | 18p11.21         | 13.29 |
| NW_001838466.2 | 23496    | T | G   | 18q11.1          | 7.71  |
| NW_001838466.2 | 23876    | G | A   | 18p11.21         | 14.27 |
| NW_001838466.2 | 24191    | G | C   | 18p11.21         | 6.74  |
| NW_001838466.2 | 24863    | T | C   | 18p11.21         | 11.16 |
| NW_001838466.2 | 26251    | G | A   | 18p11.21         | 6.45  |
| NW_001838466.2 | 26790    | A | T   | 18p11.21         | 13.21 |
| NW_001838466.2 | 27277    | A | G   | 18q11.1          | 9.42  |
| NW_001838466.2 | 28347    | G | A   | 18p11.21         | 12.65 |
| NW_001838466.2 | 28460    | A | T   | 18p11.21         | 15.26 |
| NW_001838466.2 | 29632    | A | G   | 18p11.21         | 13.04 |
| NW_001838466.2 | 31785    | A | C   | 18q11.1          | 12.63 |
| NW_001838467.2 | 26052264 | C | T   | 18p11.21         | 8.9   |
| NW_001838467.2 | 26052776 | C | A/T | 18q11.2          | 6.08  |
| NW_001838467.2 | 26053165 | C | G   | 18p11.21         | 6.91  |
| NW_001838467.2 | 26054335 | C | T   | 18p11.21         | 6.09  |
| NW_001838469.1 | 12920205 | C | T   | 18q22.1          | 9.28  |
| NW_001838473.1 | 2008070  | T | C   | 18q23            | 7.45  |
| NW_001838473.1 | 2010176  | C | T   | 18q23            | 9.29  |
| NW_001838484.1 | 8219349  | T | A   | 19p12            | 9.78  |
| NW_001838489.1 | 22523    | G | A   | 5p12             | 6.15  |
| NW_001838662.2 | 2133     | T | G   | 20q11.22         | 6.67  |
| NW_001838662.2 | 3253     | T | C   | 20p11.1-20q11.21 | 7.09  |
| NW_001838662.2 | 15365    | C | G   | 20q11.21         | 6.59  |
| NW_001838662.2 | 15540    | A | G   | 20q11.21         | 7.45  |
| NW_001838662.2 | 15545    | C | T   | 20q11.21         | 7.2   |
| NW_001838662.2 | 15692    | A | C   | 20q11.21         | 8.01  |
| NW_001838662.2 | 15930    | A | T   | 20q11.21         | 6.76  |

|                |       |   |     |          |      |
|----------------|-------|---|-----|----------|------|
| NW_001838662.2 | 15991 | A | T   | 20q11.21 | 9.49 |
| NW_001838662.2 | 16710 | A | T   | 20q11.21 | 8.29 |
| NW_001838662.2 | 16786 | A | G   | 20q11.21 | 6.99 |
| NW_001838662.2 | 16904 | G | C/T | 20q11.21 | 6.94 |
| NW_001838662.2 | 17270 | C | G   | 20q11.21 | 8.1  |
| NW_001838662.2 | 18097 | G | C   | 20q11.21 | 7.86 |
| NW_001838662.2 | 18412 | G | A   | 20q11.21 | 7.6  |
| NW_001838662.2 | 18413 | A | T   | 20q11.21 | 8.83 |
| NW_001838662.2 | 18428 | T | A/C | 20q11.21 | 7.08 |
| NW_001838662.2 | 18508 | G | T   | 20q11.21 | 7.54 |
| NW_001838662.2 | 18572 | T | C   | 20q11.21 | 7.49 |
| NW_001838662.2 | 18947 | A | T   | 20q11.21 | 7.99 |
| NW_001838662.2 | 20127 | A | T   | 20q11.21 | 6.64 |
| NW_001838662.2 | 20188 | C | T   | 20q11.21 | 7.6  |
| NW_001838662.2 | 23199 | A | G   | 20q11.21 | 8.69 |
| NW_001838662.2 | 23266 | G | A   | 20q11.21 | 6    |
| NW_001838662.2 | 25054 | C | G   | 20q11.21 | 7.29 |
| NW_001838662.2 | 25743 | G | A   | 20q11.21 | 8.2  |
| NW_001838662.2 | 31814 | T | C   | 20q11.21 | 7.37 |
| NW_001838662.2 | 32162 | C | T   | 20q11.21 | 6.21 |
| NW_001838662.2 | 33684 | G | A   | 20q11.21 | 6.73 |
| NW_001838662.2 | 34131 | T | A   | 20q11.21 | 7.95 |
| NW_001838662.2 | 37402 | C | T   | 20q11.21 | 7.54 |
| NW_001838662.2 | 38383 | T | C   | 20q11.21 | 6.36 |
| NW_001838662.2 | 42279 | A | C   | 20q11.21 | 7.14 |
| NW_001838662.2 | 42879 | T | A   | 20q11.21 | 6.6  |
| NW_001838662.2 | 45414 | C | T   | 20q11.21 | 8.26 |
| NW_001838662.2 | 45702 | A | T   | 20q11.21 | 7.19 |
| NW_001838662.2 | 46108 | C | T   | 20q11.21 | 7.67 |
| NW_001838662.2 | 46196 | C | G   | 20q11.21 | 8.79 |
| NW_001838662.2 | 46792 | T | C   | 20q11.21 | 6.74 |
| NW_001838662.2 | 47186 | G | C/T | 20q11.21 | 7.12 |
| NW_001838662.2 | 47313 | C | T   | 20q11.21 | 6.94 |
| NW_001838662.2 | 48325 | G | A   | 20p11.21 | 7    |
| NW_001838662.2 | 48981 | G | A   | 20q11.21 | 11.5 |
| NW_001838662.2 | 51273 | C | T   | 20q11.21 | 7.94 |
| NW_001838662.2 | 51815 | G | T   | 20q11.21 | 7.83 |
| NW_001838662.2 | 52284 | A | T   | 20q11.21 | 7.52 |
| NW_001838662.2 | 52303 | A | T   | 20q11.21 | 8.39 |
| NW_001838662.2 | 54557 | C | T   | 20q11.21 | 6.18 |
| NW_001838662.2 | 56983 | A | G   | 20q11.21 | 7.06 |
| NW_001838662.2 | 61183 | C | T   | 20q11.21 | 7.64 |
| NW_001838662.2 | 62215 | C | A   | 20q11.21 | 7.6  |
| NW_001838663.1 | 6665  | A | C   | 20p11.21 | 6.19 |
| NW_001838663.1 | 7682  | G | A   | 20p11.21 | 7.65 |
| NW_001838663.1 | 7941  | G | T   | 20p11.21 | 7    |
| NW_001838663.1 | 7942  | A | T   | 20p11.21 | 7.35 |
| NW_001838663.1 | 9652  | T | A   | 20q11.21 | 6.48 |
| NW_001838663.1 | 19001 | A | T   | 20p11.21 | 6.85 |
| NW_001838663.1 | 20754 | T | C   | 20p11.21 | 6.67 |
| NW_001838663.1 | 25160 | G | A/T | 20p11.21 | 7.01 |
| NW_001838663.1 | 26753 | A | G   | 20p11.21 | 7.2  |
| NW_001838663.1 | 28013 | A | T   | 20p11.21 | 7.16 |

|                |          |   |     |          |       |
|----------------|----------|---|-----|----------|-------|
| NW_001838663.1 | 29053    | G | A   | 20q11.22 | 6.41  |
| NW_001838663.1 | 31708    | C | T   | 20p11.21 | 7.52  |
| NW_001838663.1 | 32271    | G | A   | 20p11.1  | 7.45  |
| NW_001838663.1 | 32494    | A | G   | 20q11.21 | 6.49  |
| NW_001838663.1 | 33319    | C | A   | 20p11.21 | 7.35  |
| NW_001838663.1 | 34436    | C | T   | 20p11.21 | 7.26  |
| NW_001838663.1 | 34584    | G | A   | 20p11.21 | 6.27  |
| NW_001838663.1 | 34680    | T | G   | 20p11.21 | 6.89  |
| NW_001838663.1 | 37123    | G | A   | 20q11.22 | 6.4   |
| NW_001838663.1 | 43168    | A | C   | 20q11.22 | 6.43  |
| NW_001838663.1 | 44790    | G | T   | 20p11.21 | 7.75  |
| NW_001838663.1 | 44914    | C | T   | 20q11.22 | 6.2   |
| NW_001838663.1 | 47972    | C | G   | 20p11.21 | 7.68  |
| NW_001838663.1 | 48345    | C | T   | 20p11.21 | 6.5   |
| NW_001838663.1 | 48614    | G | C   | 20p11.21 | 6.05  |
| NW_001838663.1 | 50768    | A | G   | 20p11.21 | 6.42  |
| NW_001838663.1 | 51081    | T | C   | 20p11.21 | 6.7   |
| NW_001838663.1 | 291173   | G | A   | 20q11.21 | 6.46  |
| NW_001838664.2 | 5089118  | T | C   | 20p11.21 | 6.53  |
| NW_001838664.2 | 5091235  | C | T   | 20p11.1  | 6.48  |
| NW_001838664.2 | 5092505  | C | A   | 20q11.22 | 8.18  |
| NW_001838664.2 | 5118271  | C | A   | 20q11.21 | 8.99  |
| NW_001838664.2 | 5118272  | A | T   | 20p11.21 | 9.8   |
| NW_001838664.2 | 5118320  | C | A   | 20q11.22 | 8.11  |
| NW_001838666.1 | 17193428 | C | T   | 20q13.2  | 7.35  |
| NW_001838666.1 | 17210089 | G | T   | 20q13.2  | 7.87  |
| NW_001838666.1 | 17226586 | T | C   | 20q13.2  | 6.03  |
| NW_001838666.1 | 17227163 | C | T   | 20q13.2  | 7.47  |
| NW_001838706.1 | 19745370 | C | T   | 21q22.11 | 7.01  |
| NW_001838706.1 | 19745714 | G | A   | 21q22.11 | 10.34 |
| NW_001838706.1 | 19745723 | T | A   | 21q22.11 | 9.16  |
| NW_001838706.1 | 19745926 | T | C   | 21q22.11 | 10.2  |
| NW_001838706.1 | 19746973 | G | T   | 21q22.11 | 7.14  |
| NW_001838706.1 | 19746981 | C | T   | 21q22.11 | 6.34  |
| NW_001838706.1 | 19747125 | G | A   | 21q22.11 | 8.16  |
| NW_001838706.1 | 19747455 | C | T   | 21q22.11 | 8.49  |
| NW_001838706.1 | 19747861 | A | G   | 21q22.11 | 8.37  |
| NW_001838706.1 | 19748532 | A | C   | 21q22.11 | 10.36 |
| NW_001838706.1 | 19749232 | T | C   | 21q22.11 | 6.31  |
| NW_001838706.1 | 19749242 | A | G   | 21q22.11 | 7.5   |
| NW_001838706.1 | 19749562 | G | A   | 21q22.11 | 7.5   |
| NW_001838706.1 | 19749663 | G | A   | 21q22.11 | 8.33  |
| NW_001838706.1 | 19750772 | C | T   | 21q22.11 | 9.26  |
| NW_001838706.1 | 19751557 | T | A   | 21q22.11 | 9.7   |
| NW_001838706.1 | 19752044 | T | C   | 21q22.11 | 8.28  |
| NW_001838706.1 | 19753083 | C | A   | 21q22.11 | 10.77 |
| NW_001838706.1 | 19753144 | C | T   | 21q22.11 | 6.95  |
| NW_001838706.1 | 19753262 | C | T   | 21q22.11 | 9.08  |
| NW_001838706.1 | 19753356 | T | C   | 21q22.11 | 8.54  |
| NW_001838706.1 | 19753723 | C | T   | 21q22.11 | 9.99  |
| NW_001838735.2 | 1974345  | C | A/T | 22q11.1  | 7.24  |
| NW_001838735.2 | 2140729  | G | A   | 22q11.1  | 6.23  |
| NW_001838740.2 | 614786   | G | A   | 22q11.21 | 8.37  |

|                |          |   |     |          |       |
|----------------|----------|---|-----|----------|-------|
| NW_001838745.1 | 19789085 | G | C   | 22q13.2  | 11.01 |
| NW_001838745.1 | 19789395 | C | T   | 22q13.2  | 10.14 |
| NW_001838745.1 | 19789866 | T | C   | 22q13.2  | 13.23 |
| NW_001838745.1 | 19790053 | G | A   | 22q13.2  | 9.44  |
| NW_001838745.1 | 19790452 | T | C   | 22q13.2  | 9.16  |
| NW_001840631.1 | 1187     | T | G   | 9q21.11  | 6.55  |
| NW_001840631.1 | 1209     | A | C   | 9q21.11  | 6.35  |
| NW_001841054.1 | 11434    | T | G   | 17p11.2  | 6.1   |
| NW_001841054.1 | 26561    | G | A   | 17p11.2  | 6.59  |
| NW_001841054.1 | 29942    | T | A   | 17q11.2  | 6.36  |
| NW_001841054.1 | 33789    | G | A   | 17p11.2  | 7.18  |
| NW_001841054.1 | 39842    | A | T   | 17p11.2  | 6.59  |
| NW_001841054.1 | 71510    | A | G   | 17q11.2  | 6.98  |
| NW_001841054.1 | 98885    | G | A   | 17q11.2  | 6.62  |
| NW_001841054.1 | 141981   | C | T   | 17p11.2  | 6.87  |
| NW_001841054.1 | 143422   | T | C   | 17p11.2  | 6.96  |
| NW_001841054.1 | 214965   | G | A   | 17p11.2  | 6.46  |
| NW_001841054.1 | 236056   | C | A/T | 17p11.2  | 6.09  |
| NW_001841054.1 | 243063   | G | T   | 17p11.2  | 7.77  |
| NW_001841054.1 | 266750   | C | T   | 17p11.2  | 6.89  |
| NW_001840421.1 | 974      | T | A   | 18q11.2  | 6.5   |
| NW_001840421.1 | 1053     | T | A   | 18q11.1  | 6.1   |
| NW_001840421.1 | 1390     | C | T   | 18q11.1  | 8.56  |
| NW_001840421.1 | 1392     | G | A   | 18q11.1  | 8.52  |
| NW_001840421.1 | 1798     | C | A/G | 18q11.1  | 7.48  |
| NW_001840421.1 | 1998     | C | A   | 18q11.1  | 7.09  |
| NW_001840421.1 | 2326     | G | A   | 18q11.1  | 6.6   |
| NW_001840421.1 | 2516     | T | G   | 18p11.21 | 9.05  |
| NW_001840421.1 | 3227     | A | T   | 18p11.21 | 8.83  |
| NW_001839575.1 | 43467    | T | C   | 9q21.12  | 6.59  |
| NW_001839704.1 | 30920    | G | C   | 5q11.1   | 8.23  |
| NW_001839704.1 | 31205    | C | T   | 5p12     | 7.04  |
| NW_001839704.1 | 79898    | T | C   | 5p12     | 7.45  |
| NW_001840755.1 | 553      | C | T   | 7q22.1   | 10.53 |
| NW_001840755.1 | 1139     | T | G   | 7q22.1   | 6.45  |
| NW_001840653.1 | 5099     | G | T   | 22q11.1  | 7.25  |
| NW_001840853.1 | 73       | G | A   | 20q11.21 | 6.44  |
| NW_001840853.1 | 490      | G | C   | 20p11.21 | 6.76  |
| NW_001840853.1 | 2198     | C | G   | 20q11.22 | 7.9   |
| NW_001840853.1 | 2541     | G | A   | 20q11.21 | 8.43  |
| NW_001840853.1 | 2700     | G | A   | 20q11.21 | 8.08  |
| NW_001840853.1 | 3416     | A | T   | 20p11.21 | 6.07  |
| NW_001840853.1 | 3833     | C | T   | 20p11.21 | 6.9   |
| NW_001840853.1 | 3845     | C | A   | 20p11.21 | 7.54  |
| NW_001840853.1 | 4846     | T | C   | 20p11.21 | 8.59  |
| NW_001840853.1 | 4894     | C | G/T | 20p11.21 | 9.74  |
| NW_001840853.1 | 5104     | G | C   | 20p11.21 | 8.44  |
| NW_001840853.1 | 6319     | A | G   | 20q11.21 | 6.35  |
| NW_001840853.1 | 7633     | C | G   | 20q11.21 | 6.44  |
| NW_001840853.1 | 7849     | C | G   | 20q11.21 | 6.66  |
| NW_001840853.1 | 8043     | A | C   | 20q11.21 | 6.29  |
| NW_001840853.1 | 11193    | G | C   | 20q11.21 | 6.14  |
| NW_001840853.1 | 11750    | C | A   | 20p11.21 | 6.06  |



|                |       |   |   |          |       |
|----------------|-------|---|---|----------|-------|
| NW_001840853.1 | 11840 | A | G | 20q11.22 | 6.08  |
| NW_001840853.1 | 12563 | A | G | 20q11.21 | 6.64  |
| NW_001840853.1 | 13373 | A | G | 20q11.21 | 6.52  |
| NW_001840853.1 | 13819 | A | T | 20p11.21 | 6.61  |
| NW_001840853.1 | 14395 | T | G | 20p11.21 | 7.12  |
| NW_001840853.1 | 15992 | A | G | 20q11.21 | 7.34  |
| NW_001840853.1 | 16326 | G | C | 20q11.21 | 6.69  |
| NW_001840853.1 | 20398 | T | C | 20p11.21 | 8.32  |
| NW_001840853.1 | 20465 | A | G | 20q11.21 | 7.57  |
| NW_001840853.1 | 20530 | A | G | 20q11.21 | 6.2   |
| NW_001840853.1 | 21054 | A | G | 20p11.21 | 7.8   |
| NW_001840853.1 | 21974 | C | T | 20p11.21 | 8.22  |
| NW_001840853.1 | 21984 | T | C | 20p11.21 | 6.05  |
| NW_001840853.1 | 24609 | G | A | 20p11.21 | 7.03  |
| NW_001840853.1 | 25595 | G | T | 20q11.21 | 7.17  |
| NW_001840853.1 | 29726 | T | C | 20p11.21 | 7.17  |
| NW_001840853.1 | 30593 | G | A | 20q11.21 | 7.31  |
| NW_001840853.1 | 30601 | A | G | 20p11.21 | 7.16  |
| NW_001840853.1 | 30766 | C | T | 20p11.21 | 7.01  |
| NW_001840853.1 | 30899 | G | C | 20q11.22 | 7.18  |
| NW_001840853.1 | 31896 | C | T | 20p11.21 | 7.25  |
| NW_001840853.1 | 31977 | A | G | 20q11.21 | 6.08  |
| NW_001840853.1 | 32310 | C | A | 20p11.21 | 7.88  |
| NW_001840853.1 | 32589 | T | A | 20p11.21 | 6.7   |
| NW_001840853.1 | 32601 | A | C | 20p11.21 | 7.34  |
| NW_001840853.1 | 32960 | G | T | 20p11.21 | 6.65  |
| NW_001840853.1 | 33053 | G | T | 20p11.21 | 7.63  |
| NW_001840853.1 | 34416 | G | A | 20q11.21 | 7.09  |
| NW_001840853.1 | 35490 | G | A | 20p11.21 | 7.46  |
| NW_001840853.1 | 36825 | T | C | 20p11.21 | 7.09  |
| NW_001840853.1 | 37773 | T | C | 20p11.21 | 7.86  |
| NW_001840853.1 | 38913 | T | C | 20p11.21 | 8.26  |
| NW_001840853.1 | 39222 | A | G | 20p11.21 | 8.19  |
| NW_001840853.1 | 40394 | G | C | 20q11.21 | 6.2   |
| NW_001840853.1 | 40586 | G | C | 20q11.22 | 6.85  |
| NW_001840853.1 | 40851 | A | C | 20p11.21 | 7.85  |
| NW_001840853.1 | 41046 | A | T | 20q11.21 | 8.14  |
| NW_001840853.1 | 42698 | C | A | 20p11.21 | 7.33  |
| NW_001840853.1 | 42864 | G | C | 20p11.21 | 7.84  |
| NW_001840853.1 | 43284 | G | A | 20p11.21 | 7.74  |
| NW_001840853.1 | 43614 | C | A | 20q11.22 | 7.58  |
| NW_001840853.1 | 44548 | A | C | 20q11.22 | 11.75 |
| NW_001840853.1 | 44614 | C | A | 20q11.21 | 11.66 |
| NW_001840853.1 | 44944 | G | C | 20q11.22 | 11.01 |
| NW_001840853.1 | 44953 | C | T | 20q11.21 | 7.79  |
| NW_001840853.1 | 45261 | G | T | 20p11.21 | 6.98  |
| NW_001840853.1 | 45562 | G | A | 20q11.21 | 9.4   |
| NW_001840853.1 | 45617 | G | A | 20p11.21 | 7.33  |
| NW_001840853.1 | 46141 | C | T | 20p11.21 | 8.08  |
| NW_001840853.1 | 46504 | T | A | 20p11.21 | 8.1   |
| NW_001840853.1 | 75803 | A | T | 20q11.22 | 7.35  |
| NW_001840853.1 | 79105 | A | G | 20q11.22 | 9.12  |
| NW_001840853.1 | 79390 | T | C | 20q11.21 | 12.63 |

|                |        |   |     |          |       |
|----------------|--------|---|-----|----------|-------|
| NW_001840853.1 | 79672  | C | G   | 20q11.21 | 8.04  |
| NW_001840853.1 | 79968  | T | C   | 20q11.22 | 12.95 |
| NW_001840853.1 | 80952  | T | G   | 20p11.21 | 11.5  |
| NW_001840853.1 | 82249  | A | C   | 20p11.21 | 7.4   |
| NW_001840853.1 | 82268  | C | T   | 20p11.21 | 6.51  |
| NW_001840853.1 | 82460  | A | G/T | 20p11.21 | 6.51  |
| NW_001840853.1 | 83090  | G | C   | 20p11.21 | 8.23  |
| NW_001840853.1 | 83365  | C | G   | 20p11.21 | 7.5   |
| NW_001840853.1 | 84587  | T | C   | 20p11.21 | 12.32 |
| NW_001840853.1 | 84932  | A | C   | 20q11.21 | 8.54  |
| NW_001840853.1 | 86025  | C | A   | 20q11.21 | 7.98  |
| NW_001840853.1 | 86169  | G | T   | 20q11.21 | 8.61  |
| NW_001840853.1 | 87456  | A | C   | 20p11.21 | 11.89 |
| NW_001840853.1 | 87548  | A | G   | 20q11.21 | 13.4  |
| NW_001840853.1 | 87965  | G | A   | 20p11.21 | 7.12  |
| NW_001840853.1 | 88385  | A | G   | 20p11.21 | 6.95  |
| NW_001840853.1 | 88410  | G | T   | 20p11.21 | 8.16  |
| NW_001840853.1 | 88737  | A | G   | 20q11.21 | 13.42 |
| NW_001840853.1 | 90484  | G | A   | 20p11.1  | 7.68  |
| NW_001840853.1 | 90788  | T | C   | 20q11.21 | 6.46  |
| NW_001840853.1 | 91325  | T | A   | 20q11.21 | 6.23  |
| NW_001840853.1 | 92395  | T | C   | 20q11.21 | 8.97  |
| NW_001840853.1 | 93139  | A | G   | 20q11.21 | 7.82  |
| NW_001840853.1 | 93285  | A | G   | 20q11.22 | 7.44  |
| NW_001840853.1 | 93640  | G | A   | 20q11.21 | 7.87  |
| NW_001840853.1 | 93711  | C | A   | 20p11.21 | 12.23 |
| NW_001840853.1 | 93860  | A | G   | 20p11.21 | 7.57  |
| NW_001840853.1 | 93965  | A | G   | 20p11.21 | 7.51  |
| NW_001840853.1 | 95655  | G | A   | 20q11.22 | 6.76  |
| NW_001840853.1 | 96027  | G | A   | 20p11.21 | 7.13  |
| NW_001840853.1 | 96899  | T | C   | 20q11.22 | 11.64 |
| NW_001840853.1 | 97115  | T | C   | 20p11.21 | 9.77  |
| NW_001840853.1 | 98163  | A | G   | 20q11.23 | 6.45  |
| NW_001840853.1 | 98194  | C | T   | 20p11.21 | 7.82  |
| NW_001840853.1 | 104936 | T | A/C | 20q11.21 | 6.11  |
| NW_001840853.1 | 105671 | G | A/C | 20p11.21 | 7.7   |
| NW_001840853.1 | 106051 | C | T   | 20p11.21 | 6.81  |
| NW_001840853.1 | 110744 | C | G   | 20q11.21 | 6.14  |
| NW_001840853.1 | 111851 | T | A   | 20p11.21 | 7.73  |
| NW_001840853.1 | 112948 | G | C   | 20p11.21 | 6.74  |
| NW_001840853.1 | 133322 | C | T   | 20q11.21 | 6.43  |
| NW_001840853.1 | 133352 | C | A   | 20q11.22 | 6.09  |
| NW_001840853.1 | 133378 | T | C   | 20q11.21 | 7.26  |
| NW_001840853.1 | 133780 | T | C   | 20p11.21 | 6.03  |
| NW_001840853.1 | 134042 | C | A   | 20p11.21 | 7.16  |
| NW_001840853.1 | 134048 | A | G   | 20p11.21 | 7.16  |
| NW_001840853.1 | 134311 | G | T   | 20q11.21 | 6.81  |
| NW_001840853.1 | 134379 | T | G   | 20p11.21 | 8.17  |
| NW_001840853.1 | 134380 | T | G   | 20p11.21 | 8.14  |
| NW_001840853.1 | 134430 | T | A   | 20q11.22 | 7.39  |
| NW_001840853.1 | 134589 | T | C   | 20q11.22 | 8.1   |
| NW_001840853.1 | 134707 | T | A   | 20p11.21 | 8.02  |
| NW_001840853.1 | 134800 | T | G   | 20p11.21 | 6.97  |

|                |        |   |     |          |       |
|----------------|--------|---|-----|----------|-------|
| NW_001840853.1 | 135129 | G | A   | 20q11.21 | 9.13  |
| NW_001840853.1 | 135811 | A | G   | 20q11.22 | 6.24  |
| NW_001840853.1 | 135889 | T | C   | 20q11.22 | 8.07  |
| NW_001840853.1 | 136391 | C | T   | 20p11.21 | 6.56  |
| NW_001840853.1 | 136412 | G | A   | 20p11.21 | 6.36  |
| NW_001840853.1 | 137141 | T | G   | 20p11.21 | 8.19  |
| NW_001840853.1 | 140468 | G | A   | 20p11.21 | 8.78  |
| NW_001840853.1 | 140613 | T | A   | 20p11.21 | 7.21  |
| NW_001840853.1 | 141482 | T | C   | 20q11.21 | 10.41 |
| NW_001840853.1 | 147523 | A | C   | 20q11.21 | 6.34  |
| NW_001840853.1 | 147947 | T | C   | 20p11.21 | 6.38  |
| NW_001840853.1 | 148732 | C | A   | 20p11.21 | 7.88  |
| NW_001840853.1 | 149850 | C | G   | 20q11.21 | 9.3   |
| NW_001840853.1 | 150036 | C | A   | 20p11.21 | 13.17 |
| NW_001840853.1 | 150042 | G | A   | 20p11.21 | 7.32  |
| NW_001840853.1 | 150099 | T | C   | 20p11.21 | 7.66  |
| NW_001840853.1 | 150139 | G | A   | 20q11.21 | 8.32  |
| NW_001840853.1 | 150253 | G | A   | 20p11.21 | 7.85  |
| NW_001840853.1 | 151866 | A | G   | 20p11.21 | 7.27  |
| NW_001840853.1 | 152086 | A | T   | 20q11.21 | 6.51  |
| NW_001840853.1 | 152341 | C | T   | 20q11.21 | 7.76  |
| NW_001840853.1 | 153327 | A | G   | 20p11.21 | 7.4   |
| NW_001840853.1 | 153474 | G | A   | 20q11.21 | 7.69  |
| NW_001840853.1 | 153796 | C | A   | 20p11.21 | 8.14  |
| NW_001840853.1 | 154155 | C | T   | 20q11.22 | 6.77  |
| NW_001840853.1 | 156230 | C | G   | 20p11.21 | 7.97  |
| NW_001840853.1 | 156655 | C | T   | 20p11.21 | 13.12 |
| NW_001840853.1 | 156831 | A | G   | 20q11.22 | 10.16 |
| NW_001840853.1 | 157174 | C | T   | 20p11.21 | 6.88  |
| NW_001840853.1 | 157283 | T | G   | 20q11.22 | 7.98  |
| NW_001840853.1 | 157785 | C | G   | 20p11.21 | 13.38 |
| NW_001840853.1 | 158740 | A | G   | 20p11.21 | 6.45  |
| NW_001840853.1 | 159349 | A | C   | 20p11.21 | 7.41  |
| NW_001840853.1 | 167501 | C | A   | 20q11.21 | 6.65  |
| NW_001840853.1 | 167968 | A | C   | 20q11.21 | 6.34  |
| NW_001840853.1 | 168196 | A | C/T | 20q11.21 | 6.99  |
| NW_001840853.1 | 168734 | C | G/T | 20p11.21 | 7.58  |
| NW_001840853.1 | 169964 | G | A/C | 20q11.21 | 6.71  |
| NW_001840853.1 | 171565 | C | T   | 20p11.21 | 6.84  |
| NW_001840853.1 | 172267 | A | C   | 20p11.21 | 6.42  |
| NW_001840853.1 | 172783 | A | G   | 20p11.21 | 10.64 |
| NW_001840853.1 | 172797 | C | A   | 20q11.22 | 6.76  |
| NW_001840853.1 | 173077 | T | C   | 20p11.21 | 7.22  |
| NW_001840853.1 | 173850 | C | T   | 20q11.21 | 6.9   |
| NW_001840853.1 | 175388 | A | T   | 20q11.21 | 10.45 |
| NW_001840853.1 | 175524 | A | G   | 20q11.21 | 9.93  |
| NW_001840853.1 | 175566 | C | T   | 20q11.21 | 8.08  |
| NW_001840853.1 | 175576 | C | T   | 20q11.22 | 7.72  |
| NW_001840853.1 | 175626 | G | T   | 20q11.21 | 7.2   |
| NW_001840853.1 | 175736 | C | T   | 20q11.22 | 7.07  |
| NW_001840853.1 | 175737 | A | G   | 20q11.22 | 13.45 |
| NW_001840853.1 | 177639 | A | T   | 20p11.21 | 7.7   |
| NW_001840853.1 | 178138 | C | T   | 20p11.21 | 8.38  |

|                |        |   |     |          |       |
|----------------|--------|---|-----|----------|-------|
| NW_001840853.1 | 178969 | G | C   | 20p11.21 | 8.59  |
| NW_001840853.1 | 178993 | G | T   | 20p11.21 | 6.7   |
| NW_001840853.1 | 179228 | A | G   | 20p11.21 | 13.43 |
| NW_001840853.1 | 182083 | T | G   | 20p11.1  | 8.07  |
| NW_001840853.1 | 182665 | A | G   | 20q11.21 | 7.69  |
| NW_001840853.1 | 182991 | T | G   | 20p11.21 | 12.14 |
| NW_001840853.1 | 184207 | A | G   | 20q11.21 | 6.49  |
| NW_001840853.1 | 184336 | A | G   | 20q11.21 | 12.56 |
| NW_001840853.1 | 184544 | A | G   | 20p11.21 | 7.16  |
| NW_001840853.1 | 185126 | C | T   | 20p11.21 | 6.39  |
| NW_001840853.1 | 185836 | G | T   | 20q11.21 | 6.46  |
| NW_001840853.1 | 186317 | T | G   | 20q11.21 | 7.08  |
| NW_001840853.1 | 186353 | G | A   | 20p11.21 | 6.27  |
| NW_001840853.1 | 187340 | C | T   | 20q11.22 | 6.51  |
| NW_001840853.1 | 187500 | T | A   | 20p11.21 | 6.29  |
| NW_001840853.1 | 188526 | A | G   | 20p11.21 | 8.13  |
| NW_001840853.1 | 188769 | G | A   | 20p11.21 | 8.03  |
| NW_001840853.1 | 191154 | C | T   | 20p11.21 | 7.81  |
| NW_001840853.1 | 191402 | T | C   | 20p11.21 | 10.41 |
| NW_001840853.1 | 193096 | A | C   | 20q11.21 | 12.87 |
| NW_001840853.1 | 193194 | A | G   | 20p11.21 | 11.87 |
| NW_001840853.1 | 194283 | G | A   | 20p11.21 | 7.83  |
| NW_001840853.1 | 194551 | A | G   | 20p11.21 | 12.75 |
| NW_001840853.1 | 195032 | G | A   | 20p11.21 | 7.16  |
| NW_001840853.1 | 195282 | A | T   | 20p11.21 | 7.76  |
| NW_001840853.1 | 195685 | G | A   | 20q11.22 | 6.44  |
| NW_001840853.1 | 196080 | T | C   | 20q11.22 | 14.57 |
| NW_001840853.1 | 196690 | T | A   | 20q11.22 | 6.38  |
| NW_001840853.1 | 197169 | T | C   | 20p11.21 | 6.63  |
| NW_001840853.1 | 197431 | T | G   | 20p11.21 | 7.38  |
| NW_001840853.1 | 198156 | A | C/T | 20q11.21 | 13.61 |
| NW_001840853.1 | 198999 | A | G   | 20q11.21 | 9.57  |
| NW_001840853.1 | 200240 | A | C   | 20q11.22 | 6.45  |
| NW_001840853.1 | 200284 | T | G   | 20p11.21 | 7.39  |
| NW_001840853.1 | 200383 | A | T   | 20p11.21 | 7.38  |
| NW_001840853.1 | 200756 | G | A   | 20p11.21 | 7.18  |
| NW_001840853.1 | 200797 | C | G/T | 20p11.21 | 6.31  |
| NW_001840853.1 | 201223 | A | G   | 20p11.21 | 8.1   |
| NW_001840853.1 | 201391 | A | G   | 20q11.21 | 10.78 |
| NW_001840853.1 | 202078 | C | G   | 20q11.21 | 9.54  |
| NW_001840853.1 | 202760 | T | C   | 20p11.21 | 10.43 |
| NW_001840853.1 | 203419 | G | A   | 20q11.21 | 7.21  |
| NW_001840853.1 | 204316 | G | A   | 20q11.21 | 7.73  |
| NW_001840853.1 | 205059 | G | T   | 20q11.21 | 6.35  |
| NW_001840853.1 | 206195 | C | T   | 20p11.21 | 7.84  |
| NW_001840853.1 | 206415 | T | C   | 20q11.21 | 7.32  |
| NW_001840853.1 | 206574 | C | T   | 20q11.21 | 8.07  |
| NW_001840853.1 | 207412 | C | T   | 20q11.22 | 13.33 |
| NW_001840853.1 | 207466 | G | A   | 20p11.21 | 7.77  |
| NW_001840853.1 | 207742 | G | A   | 20p11.21 | 7.32  |
| NW_001840853.1 | 207936 | T | G   | 20p11.21 | 8.11  |
| NW_001840853.1 | 210685 | A | G   | 20q11.22 | 7.65  |
| NW_001840853.1 | 212739 | A | G   | 20q11.22 | 6.41  |

|                |        |   |     |          |       |
|----------------|--------|---|-----|----------|-------|
| NW_001840853.1 | 213490 | G | A   | 20p11.21 | 7.65  |
| NW_001840853.1 | 213841 | A | G   | 20p11.21 | 7.66  |
| NW_001840853.1 | 214571 | A | G   | 20p11.21 | 6.23  |
| NW_001840853.1 | 215430 | A | G   | 20q11.21 | 7.34  |
| NW_001840853.1 | 216652 | A | C   | 20p11.21 | 7.49  |
| NW_001840853.1 | 216678 | C | T   | 20q11.21 | 7.39  |
| NW_001840853.1 | 217533 | T | C   | 20p11.21 | 6.59  |
| NW_001840853.1 | 218221 | A | G   | 20q11.22 | 6.84  |
| NW_001840853.1 | 218939 | C | A   | 20p11.21 | 6.08  |
| NW_001840853.1 | 219406 | T | C   | 20q11.21 | 7.64  |
| NW_001840853.1 | 219409 | T | C   | 20q11.22 | 13.21 |
| NW_001840853.1 | 220188 | T | A   | 20p11.21 | 7.01  |
| NW_001840853.1 | 221731 | A | G   | 20p11.21 | 6.89  |
| NW_001840853.1 | 222315 | T | C   | 20q11.22 | 6.15  |
| NW_001840853.1 | 222320 | T | C   | 20p11.21 | 6.52  |
| NW_001840853.1 | 222459 | A | C   | 20p11.21 | 6.71  |
| NW_001840853.1 | 222469 | T | G   | 20q11.21 | 6.3   |
| NW_001840853.1 | 222653 | C | T   | 20p11.21 | 6.96  |
| NW_001840853.1 | 223452 | C | G   | 20p11.21 | 7.58  |
| NW_001840853.1 | 223488 | A | G   | 20q11.21 | 6.78  |
| NW_001840853.1 | 224831 | T | A/G | 20p11.21 | 6.19  |
| NW_001840853.1 | 224907 | G | A   | 20p11.21 | 7.11  |
| NW_001840853.1 | 287155 | G | T   | 20q11.21 | 7.08  |
| NW_001840853.1 | 289173 | T | C   | 20q11.21 | 6.04  |
| NW_001840853.1 | 290671 | A | G   | 20q11.21 | 10.76 |
| NW_001840853.1 | 291043 | C | T   | 20p11.21 | 8.61  |
| NW_001840853.1 | 292586 | C | T   | 20q11.21 | 7.92  |
| NW_001840853.1 | 293073 | T | A   | 20p11.21 | 7.13  |
| NW_001840853.1 | 293434 | C | T   | 20q11.22 | 7.02  |
| NW_001840853.1 | 295846 | A | T   | 20p11.21 | 8.21  |
| NW_001840853.1 | 297353 | T | C   | 20q11.21 | 6.94  |
| NW_001840853.1 | 299321 | G | C   | 20q11.22 | 8.46  |
| NW_001840853.1 | 299392 | C | T   | 20q11.21 | 12.32 |
| NW_001840853.1 | 299578 | T | G   | 20p11.21 | 7.03  |
| NW_001840853.1 | 299660 | C | T   | 20q11.22 | 11.79 |
| NW_001840853.1 | 299868 | T | C   | 20p11.21 | 6.67  |
| NW_001840853.1 | 300908 | T | C   | 20p11.21 | 6.13  |
| NW_001840853.1 | 302824 | C | T   | 20q11.21 | 7.26  |
| NW_001840853.1 | 303603 | A | G   | 20p11.21 | 7.17  |
| NW_001840853.1 | 304593 | A | C   | 20p11.21 | 7.92  |
| NW_001840853.1 | 304704 | G | A   | 20q11.21 | 8.35  |
| NW_001840853.1 | 304815 | G | A   | 20q11.21 | 13.21 |
| NW_001840853.1 | 304836 | A | G   | 20p11.21 | 6.58  |
| NW_001840853.1 | 304924 | C | A   | 20p11.21 | 7.19  |
| NW_001840853.1 | 305400 | T | C   | 20p11.21 | 7.31  |
| NW_001840853.1 | 308107 | C | T   | 20p11.21 | 7.56  |
| NW_001840853.1 | 308431 | T | A   | 20q11.21 | 6.08  |
| NW_001840853.1 | 311669 | A | C   | 20p11.21 | 7.77  |
| NW_001840853.1 | 311999 | T | G   | 20p11.21 | 7.1   |
| NW_001840853.1 | 313262 | C | G   | 20p11.21 | 6.98  |
| NW_001840853.1 | 313266 | G | A   | 20q11.21 | 7.5   |
| NW_001840853.1 | 313891 | T | C   | 20p11.21 | 6.57  |
| NW_001840853.1 | 315886 | C | G   | 20q11.21 | 7.75  |

|                |        |   |       |          |       |
|----------------|--------|---|-------|----------|-------|
| NW_001840853.1 | 316450 | A | C     | 20q11.21 | 7.2   |
| NW_001840853.1 | 316524 | T | A     | 20p11.21 | 6.39  |
| NW_001840853.1 | 316754 | T | C     | 20p11.21 | 12.36 |
| NW_001840853.1 | 316798 | C | A     | 20p11.21 | 8.14  |
| NW_001840853.1 | 317382 | C | T     | 20p11.21 | 6.37  |
| NW_001840853.1 | 317610 | T | C     | 20q11.22 | 7.9   |
| NW_001840853.1 | 318042 | A | G     | 20p11.21 | 7.18  |
| NW_001840853.1 | 318119 | G | A     | 20p11.21 | 6.28  |
| NW_001840853.1 | 318606 | T | C     | 20q11.22 | 9.69  |
| NW_001840853.1 | 319747 | T | C     | 20q11.21 | 9.69  |
| NW_001840853.1 | 319789 | G | A/T   | 20p11.21 | 7.35  |
| NW_001840853.1 | 320250 | A | T     | 20p11.21 | 12.51 |
| NW_001840853.1 | 325371 | T | C     | 20q11.21 | 12.3  |
| NW_001840853.1 | 325557 | C | T     | 20p11.21 | 7.08  |
| NW_001840853.1 | 326460 | A | G     | 20p11.21 | 6.89  |
| NW_001840853.1 | 334259 | C | T     | 20q11.21 | 6.44  |
| NW_001840853.1 | 334960 | G | A     | 20q11.21 | 7.05  |
| NW_001840853.1 | 338205 | C | T     | 20p11.21 | 11.55 |
| NW_001840853.1 | 338549 | G | A     | 20q11.21 | 6.98  |
| NW_001840853.1 | 338872 | C | G     | 20q11.21 | 11.04 |
| NW_001840853.1 | 338904 | C | T     | 20q11.21 | 7.21  |
| NW_001840853.1 | 339700 | A | G     | 20q11.21 | 7.04  |
| NW_001840853.1 | 340834 | G | T     | 20q11.21 | 6.11  |
| NW_001840853.1 | 341577 | G | A     | 20p11.21 | 8.3   |
| NW_001840853.1 | 341769 | C | T     | 20q11.21 | 6.41  |
| NW_001840853.1 | 343516 | C | G     | 20p11.1  | 6.08  |
| NW_001840853.1 | 345255 | A | G     | 20q11.21 | 8.79  |
| NW_001840853.1 | 347192 | G | T     | 20p11.21 | 7.25  |
| NW_001840853.1 | 348312 | T | A     | 20p11.21 | 7.08  |
| NW_001840853.1 | 348353 | G | A     | 20q11.21 | 8.02  |
| NW_001840853.1 | 350714 | C | T     | 20p11.21 | 7.61  |
| NW_001840853.1 | 351254 | A | G     | 20q11.22 | 7.07  |
| NW_001840853.1 | 351329 | C | G     | 20p11.21 | 6.86  |
| NW_001840853.1 | 352138 | C | T     | 20p11.1  | 6.54  |
| NW_001840853.1 | 355559 | T | A     | 20q11.21 | 7.95  |
| NW_001840853.1 | 357467 | C | A     | 20p11.21 | 7.45  |
| NW_001840853.1 | 361222 | T | C     | 20q11.22 | 10.79 |
| NW_001840853.1 | 362453 | C | A     | 20p11.21 | 7.08  |
| NW_001840553.1 | 595    | G | A/C/T | 12q14.2  | 6.59  |
| NW_001841116.1 | 1714   | A | G     | 19p12    | 8.36  |
| NW_001841116.1 | 1737   | G | A     | 19p12    | 7.67  |
| NW_001841116.1 | 3368   | C | T     | 5p12     | 8.96  |
| NW_001841116.1 | 6083   | G | T     | 5q11.2   | 7.28  |
| NW_001841116.1 | 6099   | C | A/T   | 5p12     | 7.47  |
| NW_001841116.1 | 6921   | T | C     | 5q11.2   | 6.93  |
| NW_001841116.1 | 6971   | A | T     | 5p12     | 7.5   |
| NW_001841116.1 | 26658  | T | A     | 19p12    | 6.8   |
| NW_001841116.1 | 29278  | T | A     | 19p12    | 6.25  |
| NW_001840369.1 | 133    | C | G     | 20q11.22 | 6.7   |
| NW_001840369.1 | 480    | G | T     | 20q11.21 | 6.34  |
| NW_001840369.1 | 481    | G | T     | 20q11.21 | 6.27  |
| NW_001840369.1 | 770    | T | A     | 20q11.21 | 6.9   |
| NW_001840369.1 | 902    | T | C     | 20p11.21 | 7.34  |

|                |        |   |     |          |       |
|----------------|--------|---|-----|----------|-------|
| NW_001840369.1 | 1592   | A | G   | 20p11.21 | 6.68  |
| NW_001840369.1 | 1653   | G | A   | 20q11.21 | 6.01  |
| NW_001840369.1 | 2293   | T | G   | 20p11.21 | 6.18  |
| NW_001840369.1 | 11198  | A | G   | 20p11.21 | 6.58  |
| NW_001840125.1 | 996    | C | T   | 20q11.22 | 10.19 |
| NW_001840125.1 | 1040   | A | T   | 20q11.21 | 7.69  |
| NW_001840125.1 | 1302   | G | A   | 20q11.21 | 6.97  |
| NW_001840125.1 | 1630   | T | A   | 20p11.21 | 7.54  |
| NW_001840125.1 | 1835   | C | A   | 20q11.21 | 7.97  |
| NW_001840125.1 | 1919   | T | A/G | 20q11.22 | 6.24  |
| NW_001840125.1 | 2035   | T | A   | 20q11.21 | 6.28  |
| NW_001840125.1 | 10246  | A | T   | 20q11.22 | 8.37  |
| NW_001841084.1 | 783    | T | C   | 1q21.1   | 6.75  |
| NW_001840527.1 | 1359   | A | G   | 10p11.21 | 6.37  |
| NW_001839881.1 | 10204  | C | T   | 20q11.21 | 7.4   |
| NW_001841146.1 | 238579 | A | G   | 1q21.1   | 6.27  |
| NW_001842331.1 | 5470   | T | C   | 2q11.2   | 9.99  |
| NW_001842331.1 | 5562   | A | G   | 2p11.2   | 7.31  |
| NW_001839726.1 | 2376   | G | T   | 16q12.1  | 9.08  |
| NW_001839726.1 | 12752  | T | G   | 16q12.1  | 9.93  |
| NW_001839466.1 | 4694   | C | T   | 4p16.3   | 10.75 |
| NW_001839466.1 | 4774   | G | A   | 4p16.3   | 10.71 |
| NW_001839466.1 | 5458   | T | C   | 4p16.3   | 8.43  |
| NW_001839466.1 | 6103   | C | T   | 4p16.3   | 6.72  |
| NW_001839466.1 | 6769   | T | C   | 4p16.3   | 6.28  |
| NW_001839279.1 | 13674  | G | T   | 19p12    | 6.6   |
| NW_001839960.1 | 1848   | G | A   | 18q11.1  | 8.74  |
| NW_001839960.1 | 3600   | C | T   | 18q11.1  | 10.07 |
| NW_001839960.1 | 3699   | A | T   | 18q11.1  | 7.66  |
| NW_001839960.1 | 3714   | G | A   | 18q11.1  | 9.02  |
| NW_001839960.1 | 4130   | A | G   | 18q11.1  | 8.06  |
| NW_001839960.1 | 4433   | A | G   | 18q11.1  | 8.48  |
| NW_001839960.1 | 4585   | A | G   | 18p11.21 | 12.53 |
| NW_001839960.1 | 4624   | C | G/T | 18q11.2  | 7.39  |
| NW_001839960.1 | 4836   | G | A   | 18p11.21 | 11.11 |
| NW_001839960.1 | 5239   | G | T   | 18q11.1  | 7.74  |
| NW_001839960.1 | 5748   | A | C/T | 18q11.2  | 9.49  |
| NW_001839960.1 | 6108   | A | G   | 18q11.1  | 6.78  |
| NW_001839960.1 | 6126   | C | T   | 18p11.21 | 6.92  |
| NW_001839960.1 | 6603   | G | A   | 18q11.2  | 6.05  |
| NW_001839960.1 | 6998   | G | T   | 18p11.21 | 6.74  |
| NW_001839960.1 | 7037   | C | G   | 18q11.1  | 7.14  |
| NW_001839960.1 | 16023  | T | G   | 18p11.21 | 6.03  |
| NW_001839960.1 | 16525  | G | A   | 18p11.21 | 7.9   |
| NW_001840958.1 | 1673   | C | T   | 1q21.1   | 8.23  |
| NW_001840180.1 | 2735   | T | A   | 1q21.1   | 8.83  |
| NW_001839641.1 | 1116   | G | A   | 2q11.2   | 6.7   |
| NW_001839641.1 | 1646   | C | T   | 2q11.2   | 6.99  |
| NW_001839641.1 | 2321   | G | A   | 2q11.2   | 6.4   |
| NW_001839641.1 | 2416   | G | A   | 2q11.2   | 7.47  |
| NW_001839641.1 | 2471   | G | A   | 2q11.2   | 7.02  |
| NW_001839641.1 | 2825   | T | C   | 2q11.2   | 6.78  |
| NW_001839641.1 | 4218   | C | T   | 2q11.2   | 6.56  |

|                |        |   |   |                   |       |
|----------------|--------|---|---|-------------------|-------|
| NW_001839641.1 | 4313   | T | G | 2q11.2            | 8.87  |
| NW_001839641.1 | 4438   | C | T | 2q11.2            | 9.35  |
| NW_001839641.1 | 4793   | T | A | 2p11.2            | 7.01  |
| NW_001839641.1 | 5196   | A | C | 2p11.2            | 11.55 |
| NW_001839641.1 | 6585   | G | C | 2q11.1            | 9.15  |
| NW_001839641.1 | 7509   | C | T | 2q11.2            | 7.81  |
| NW_001839641.1 | 7765   | T | C | 2q11.1            | 10.42 |
| NW_001839641.1 | 8260   | C | T | 2q11.1            | 8.17  |
| NW_001839641.1 | 9059   | G | A | 2q11.2            | 7.49  |
| NW_001839641.1 | 10282  | A | G | 2q11.1            | 6.77  |
| NW_001839641.1 | 10424  | A | G | 2q11.2            | 7.67  |
| NW_001839641.1 | 11834  | C | A | 2p11.2            | 9.84  |
| NW_001839641.1 | 11897  | T | C | 2p11.2            | 6.81  |
| NW_001839641.1 | 12386  | G | A | 2q11.2            | 7.58  |
| NW_001839641.1 | 12527  | G | A | 2p11.2            | 7.2   |
| NW_001840308.1 | 1149   | T | C | 9p13.1            | 6.34  |
| NW_001841138.1 | 620    | C | T | 20p11.21          | 8.12  |
| NW_001841138.1 | 1337   | A | G | 20q11.21          | 6.08  |
| NW_001841138.1 | 3375   | T | G | 20p11.21          | 8.28  |
| NW_001841138.1 | 6490   | A | G | 20p11.21          | 6.67  |
| NW_001841138.1 | 7266   | T | C | 20p11.21          | 6.57  |
| NW_001841138.1 | 8155   | A | G | 20p11.21          | 7.22  |
| NW_001841138.1 | 15128  | C | A | 20q11.21          | 8.35  |
| NW_001841138.1 | 15475  | C | A | 20p11.21          | 7.03  |
| NW_001841138.1 | 15842  | A | G | 20q11.21          | 11.93 |
| NW_001841138.1 | 16046  | G | A | 20q11.22          | 6.18  |
| NW_001841138.1 | 16176  | A | C | 20q11.21          | 12.64 |
| NW_001841138.1 | 16315  | C | A | 20p11.21          | 10.95 |
| NW_001841138.1 | 17560  | A | C | 20p11.21          | 13.72 |
| NW_001841138.1 | 17636  | A | G | 20p11.21          | 9.12  |
| NW_001841138.1 | 17912  | G | T | 20p11.21          | 6.62  |
| NW_001841138.1 | 20189  | G | C | 20p11.21          | 11.71 |
| NW_001841138.1 | 20648  | A | G | 20q11.21          | 11.12 |
| NW_001841138.1 | 25149  | C | T | 20p11.21          | 7.12  |
| NW_001841138.1 | 28632  | C | T | 20p11.21          | 7.18  |
| NW_001841138.1 | 31856  | T | C | 20p11.21          | 7.34  |
| NW_001841138.1 | 32185  | C | A | 20q11.22          | 6.08  |
| NW_001841138.1 | 32394  | G | T | 20p11.21          | 7.32  |
| NW_001841138.1 | 34642  | T | G | 20q11.21-20q11.22 | 6.33  |
| NW_001841138.1 | 34860  | C | A | 20p11.21          | 7.34  |
| NW_001841138.1 | 39609  | A | G | 20p11.21          | 6.5   |
| NW_001841138.1 | 43716  | C | T | 20p11.21          | 6.94  |
| NW_001841138.1 | 44926  | G | A | 20p11.21          | 7.84  |
| NW_001841138.1 | 50117  | G | A | 20p11.21          | 8.87  |
| NW_001841138.1 | 60434  | T | C | 20p11.21          | 8.19  |
| NW_001841138.1 | 74517  | T | C | 20p11.21          | 7.17  |
| NW_001841138.1 | 76865  | A | T | 20q11.22          | 6.59  |
| NW_001841138.1 | 78256  | G | A | 20p11.21          | 6.16  |
| NW_001841138.1 | 83263  | A | G | 20p11.21          | 7.14  |
| NW_001841138.1 | 85043  | C | T | 20p11.1           | 6.14  |
| NW_001841138.1 | 99922  | G | A | 20q11.22          | 6.4   |
| NW_001841138.1 | 104233 | A | G | 20p11.21          | 7.2   |
| NW_001841138.1 | 105469 | G | T | 20q11.22          | 8.67  |



|                |        |   |     |                   |      |
|----------------|--------|---|-----|-------------------|------|
| NW_001841138.1 | 109680 | G | A   | 20p11.21          | 6.63 |
| NW_001841138.1 | 127863 | G | A   | 20p11.21          | 6.54 |
| NW_001841138.1 | 130578 | T | C   | 20p11.21          | 6.21 |
| NW_001841138.1 | 134837 | A | C   | 20p11.21          | 8.05 |
| NW_001841138.1 | 139913 | A | G   | 20p11.21          | 7.8  |
| NW_001841138.1 | 139981 | T | C   | 20q11.22          | 7.29 |
| NW_001841138.1 | 153905 | C | T   | 20p11.21          | 6.54 |
| NW_001841138.1 | 160280 | G | A   | 20p11.21          | 7.86 |
| NW_001841138.1 | 164467 | C | A   | 20p11.21          | 8.83 |
| NW_001841138.1 | 170125 | T | C   | 20p11.21          | 7.14 |
| NW_001841138.1 | 170649 | A | G   | 20p11.21          | 6.86 |
| NW_001841138.1 | 174706 | A | G   | 20p11.21          | 6.4  |
| NW_001841138.1 | 177520 | T | C   | 20p11.21          | 8.13 |
| NW_001841138.1 | 179758 | G | A/T | 20p11.21          | 6.99 |
| NW_001841138.1 | 194712 | T | C   | 20p11.21          | 6.15 |
| NW_001841138.1 | 200429 | A | G   | 20p11.21          | 6.79 |
| NW_001841138.1 | 201557 | A | G   | 20p11.21          | 6.5  |
| NW_001841138.1 | 217499 | A | T   | 20p11.21          | 8    |
| NW_001841138.1 | 221366 | A | T   | 20p11.21          | 7.73 |
| NW_001841138.1 | 222078 | A | G/T | 20q11.21          | 8.82 |
| NW_001841138.1 | 225679 | A | G   | 20p11.21          | 6.94 |
| NW_001841138.1 | 227241 | C | G   | 20q11.21-20q11.22 | 7.69 |
| NW_001841138.1 | 228960 | G | A   | 20p11.21          | 7.42 |
| NW_001841138.1 | 233138 | T | C   | 20p11.21          | 8.03 |
| NW_001841138.1 | 235331 | A | G   | 20q11.21          | 7.52 |
| NW_001841138.1 | 237015 | G | C   | 20p11.21          | 8.64 |
| NW_001841138.1 | 238727 | A | C   | 20q11.21          | 6.29 |
| NW_001841138.1 | 239529 | C | T   | 20p11.21          | 6.37 |
| NW_001841138.1 | 240532 | G | A   | 20p11.1           | 8.59 |
| NW_001841138.1 | 241465 | C | G   | 20p11.21          | 8.12 |
| NW_001841138.1 | 252288 | A | G   | 20p11.21          | 7.32 |
| NW_001841138.1 | 257411 | T | G   | 20p11.21          | 6.57 |
| NW_001841138.1 | 257482 | C | G   | 20p11.21          | 7.38 |
| NW_001841138.1 | 259044 | G | A   | 20q11.21          | 6.76 |
| NW_001841138.1 | 260007 | T | C   | 20p11.21          | 6.98 |
| NW_001841138.1 | 260563 | A | C   | 20p11.21          | 6.37 |
| NW_001841138.1 | 263044 | G | A   | 20p11.21          | 9.95 |
| NW_001841138.1 | 265132 | C | T   | 20p11.21          | 7.92 |
| NW_001841138.1 | 265279 | C | G   | 20p11.21          | 8.51 |
| NW_001841138.1 | 266947 | A | T   | 20p11.21          | 6.34 |
| NW_001841138.1 | 268663 | A | G   | 20p11.21          | 6.1  |
| NW_001841138.1 | 270783 | T | C   | 20q11.21          | 7.5  |
| NW_001841138.1 | 270853 | G | A   | 20p11.21          | 6.44 |
| NW_001841138.1 | 273439 | C | A   | 20p11.21          | 6.34 |
| NW_001841138.1 | 274115 | A | G   | 20p11.21          | 8.04 |
| NW_001841138.1 | 279867 | T | C   | 20q11.21          | 6.37 |
| NW_001841138.1 | 282845 | G | A   | 20p11.21          | 8.46 |
| NW_001841138.1 | 283062 | T | C   | 20q11.21          | 7.27 |
| NW_001841138.1 | 283260 | C | T   | 20p11.21          | 8.6  |
| NW_001841138.1 | 283433 | A | T   | 20p11.21          | 8.07 |
| NW_001841138.1 | 284543 | T | C   | 20p11.21          | 7.56 |
| NW_001841138.1 | 286114 | C | T   | 20p11.21          | 7.16 |
| NW_001841138.1 | 290618 | C | G   | 20p11.21          | 6.24 |

|                |        |   |     |          |       |
|----------------|--------|---|-----|----------|-------|
| NW_001841138.1 | 291063 | T | C   | 20p11.21 | 6.07  |
| NW_001841138.1 | 292503 | T | G   | 20p11.21 | 6.36  |
| NW_001841138.1 | 293374 | A | G   | 20p11.21 | 6.19  |
| NW_001841138.1 | 294211 | G | A   | 20p11.21 | 7.27  |
| NW_001841138.1 | 295615 | T | C   | 20p11.21 | 8.64  |
| NW_001841138.1 | 297364 | C | G   | 20q11.21 | 7.65  |
| NW_001841138.1 | 299283 | T | C   | 20p11.21 | 6.39  |
| NW_001841138.1 | 299962 | C | A   | 20p11.21 | 8.84  |
| NW_001841138.1 | 302166 | T | C   | 20p11.21 | 6.74  |
| NW_001841138.1 | 304094 | C | A/T | 20q11.21 | 9.22  |
| NW_001841138.1 | 311084 | A | G   | 20p11.21 | 6.59  |
| NW_001841138.1 | 313706 | G | A   | 20q11.22 | 7.09  |
| NW_001841138.1 | 318043 | A | C   | 20p11.21 | 8.86  |
| NW_001841138.1 | 319366 | C | G   | 20p11.21 | 8.22  |
| NW_001841138.1 | 319865 | C | T   | 20p11.21 | 7.81  |
| NW_001841138.1 | 320194 | T | C   | 20q11.21 | 7.62  |
| NW_001841138.1 | 321165 | A | G   | 20q11.21 | 8.02  |
| NW_001841138.1 | 322642 | T | C   | 20q11.21 | 7.14  |
| NW_001841138.1 | 323092 | T | C   | 20p11.21 | 6.37  |
| NW_001841138.1 | 325461 | T | G   | 20p11.21 | 6.91  |
| NW_001841138.1 | 325677 | T | C   | 20p11.21 | 6.08  |
| NW_001841138.1 | 327171 | T | A   | 20p11.21 | 8.71  |
| NW_001841138.1 | 327906 | C | G   | 20q11.21 | 6.75  |
| NW_001841138.1 | 330186 | C | A   | 20p11.21 | 7.25  |
| NW_001841138.1 | 336488 | C | T   | 20p11.21 | 6.94  |
| NW_001841138.1 | 340280 | G | A   | 20p11.21 | 7.27  |
| NW_001841138.1 | 340973 | A | G   | 20p11.21 | 7.05  |
| NW_001841138.1 | 342391 | G | T   | 20q11.21 | 6.23  |
| NW_001841138.1 | 346113 | C | T   | 20q11.22 | 6.8   |
| NW_001841138.1 | 348597 | C | T   | 20p11.21 | 8.52  |
| NW_001841138.1 | 349717 | A | G   | 20p11.21 | 7.36  |
| NW_001841138.1 | 349743 | G | A   | 20p11.21 | 6.97  |
| NW_001841138.1 | 365214 | A | G   | 20q11.21 | 8.4   |
| NW_001841138.1 | 367511 | A | G   | 20p11.21 | 7.34  |
| NW_001841138.1 | 368420 | T | A   | 20p11.21 | 6.38  |
| NW_001841138.1 | 368819 | G | A   | 20p11.21 | 7.85  |
| NW_001841138.1 | 372260 | T | C   | 20q11.21 | 8.41  |
| NW_001841138.1 | 372735 | A | G   | 20p11.21 | 6.2   |
| NW_001841138.1 | 373489 | C | G   | 20p11.21 | 7.51  |
| NW_001841138.1 | 375569 | A | G   | 20q11.21 | 8.09  |
| NW_001841138.1 | 384577 | A | C   | 20p11.21 | 11.09 |
| NW_001841138.1 | 384611 | T | C   | 20p11.21 | 11.49 |
| NW_001841138.1 | 386913 | T | C   | 20p11.21 | 8.33  |
| NW_001841138.1 | 387136 | A | G   | 20p11.21 | 9.28  |
| NW_001841138.1 | 389342 | T | C   | 20p11.21 | 9.31  |
| NW_001841138.1 | 390489 | C | G   | 20p11.21 | 7.41  |
| NW_001841138.1 | 390687 | C | T   | 20p11.21 | 6.27  |
| NW_001841138.1 | 393489 | G | T   | 20p11.21 | 8.21  |
| NW_001841138.1 | 395445 | C | T   | 20p11.21 | 7.07  |
| NW_001841138.1 | 396073 | T | C   | 20p11.21 | 7.39  |
| NW_001841138.1 | 396645 | A | G   | 20p11.21 | 8.82  |
| NW_001841138.1 | 397178 | T | G   | 20p11.21 | 8.7   |
| NW_001841138.1 | 400336 | G | T   | 20p11.21 | 8.04  |

|                |        |   |   |          |       |
|----------------|--------|---|---|----------|-------|
| NW_001841138.1 | 400820 | T | C | 20p11.21 | 7.96  |
| NW_001841138.1 | 402423 | C | T | 20p11.21 | 6.7   |
| NW_001841138.1 | 406255 | T | C | 20q11.21 | 8.04  |
| NW_001841138.1 | 406811 | T | G | 20p11.21 | 6.25  |
| NW_001841138.1 | 410487 | G | A | 20p11.21 | 6.86  |
| NW_001841138.1 | 417474 | A | G | 20p11.21 | 10.11 |
| NW_001841138.1 | 417688 | T | C | 20p11.21 | 10.33 |
| NW_001841138.1 | 417714 | G | A | 20p11.21 | 9.62  |
| NW_001841138.1 | 418353 | G | A | 20q11.21 | 7.09  |
| NW_001841138.1 | 418521 | A | T | 20p11.21 | 6.92  |
| NW_001841138.1 | 419201 | A | T | 20p11.21 | 8.94  |
| NW_001841138.1 | 419895 | T | C | 20p11.21 | 9.09  |
| NW_001841138.1 | 420588 | C | G | 20p11.21 | 6.97  |
| NW_001841138.1 | 420886 | G | A | 20p11.21 | 7.26  |
| NW_001841138.1 | 423958 | T | G | 20p11.21 | 8.47  |
| NW_001841138.1 | 424964 | C | T | 20p11.21 | 7.43  |
| NW_001841138.1 | 425786 | T | A | 20p11.21 | 10.17 |
| NW_001841138.1 | 428773 | T | C | 20q11.21 | 8.09  |
| NW_001841138.1 | 431154 | G | A | 20p11.21 | 8.64  |
| NW_001841138.1 | 432263 | A | G | 20p11.21 | 6.2   |
| NW_001841138.1 | 433674 | A | G | 20p11.21 | 6.15  |
| NW_001841138.1 | 439418 | C | A | 20q11.21 | 8.16  |
| NW_001841138.1 | 439852 | T | C | 20p11.21 | 8.22  |
| NW_001841138.1 | 439866 | A | G | 20p11.21 | 7.65  |
| NW_001841138.1 | 441576 | G | A | 20p11.21 | 9.34  |
| NW_001841138.1 | 443064 | C | T | 20p11.21 | 9.75  |
| NW_001841138.1 | 443456 | G | A | 20q11.21 | 9.65  |
| NW_001841138.1 | 452955 | A | G | 20p11.21 | 6.44  |
| NW_001841138.1 | 453086 | C | A | 20p11.21 | 6.42  |
| NW_001841138.1 | 453643 | C | T | 20p11.21 | 6.44  |
| NW_001841138.1 | 458432 | T | A | 20q11.21 | 7.26  |
| NW_001841138.1 | 459467 | G | A | 20p11.21 | 6.07  |
| NW_001841138.1 | 460021 | G | A | 20p11.21 | 6.06  |
| NW_001841138.1 | 463199 | T | C | 20p11.21 | 8.39  |
| NW_001841138.1 | 466272 | C | G | 20p11.21 | 9.36  |
| NW_001841138.1 | 467381 | A | G | 20p11.21 | 6.83  |
| NW_001841138.1 | 469885 | G | T | 20q11.21 | 10.67 |
| NW_001841138.1 | 470476 | A | G | 20p11.21 | 7.05  |
| NW_001841138.1 | 471072 | G | A | 20p11.21 | 9.76  |
| NW_001841138.1 | 472690 | T | C | 20q11.21 | 6.17  |
| NW_001841138.1 | 474206 | T | C | 20q11.21 | 8.3   |
| NW_001841138.1 | 475288 | A | T | 20p11.21 | 6.95  |
| NW_001841138.1 | 475817 | T | C | 20p11.21 | 6.35  |
| NW_001841138.1 | 477374 | T | C | 20q11.21 | 9.82  |
| NW_001841138.1 | 479702 | C | T | 20q11.21 | 6.82  |
| NW_001841138.1 | 480498 | T | A | 20p11.21 | 8.46  |
| NW_001841138.1 | 481593 | A | G | 20p11.21 | 6.75  |
| NW_001841138.1 | 482119 | G | T | 20p11.1  | 7.68  |
| NW_001841138.1 | 483367 | T | A | 20p11.21 | 6.74  |
| NW_001841138.1 | 483479 | A | G | 20p11.21 | 6.05  |
| NW_001841138.1 | 487955 | G | T | 20p11.1  | 10.03 |
| NW_001841138.1 | 490038 | T | C | 20p11.21 | 7.08  |
| NW_001841138.1 | 490600 | G | A | 20p11.21 | 7.18  |

|                |        |   |     |          |       |
|----------------|--------|---|-----|----------|-------|
| NW_001841138.1 | 494646 | T | A   | 20p11.21 | 7.3   |
| NW_001841138.1 | 496905 | G | C   | 20q11.21 | 7.91  |
| NW_001841138.1 | 515954 | C | G   | 20p11.21 | 8.57  |
| NW_001841138.1 | 516796 | A | C   | 20p11.21 | 8.51  |
| NW_001841138.1 | 518104 | T | C   | 20p11.21 | 6.28  |
| NW_001841138.1 | 518105 | T | C   | 20p11.21 | 6.28  |
| NW_001841138.1 | 601968 | C | T   | 20p11.21 | 6.31  |
| NW_001841138.1 | 655554 | G | A   | 20p11.1  | 8.02  |
| NW_001841138.1 | 659464 | C | T   | 20q11.23 | 7.34  |
| NW_001841138.1 | 663391 | C | T   | 20q11.23 | 7.35  |
| NW_001841138.1 | 667177 | C | G   | 20q11.23 | 6.37  |
| NW_001841138.1 | 678417 | T | C   | 20q11.21 | 8.05  |
| NW_001841138.1 | 679073 | T | C   | 20p11.21 | 8.57  |
| NW_001841138.1 | 681714 | C | A/T | 20p11.21 | 7.01  |
| NW_001841138.1 | 684927 | A | T   | 20q11.22 | 7.44  |
| NW_001841138.1 | 685516 | T | A   | 20q11.21 | 7     |
| NW_001840272.1 | 59465  | T | C   | 5p12     | 8.11  |
| NW_001840272.1 | 59802  | G | T   | 5p12     | 8.45  |
| NW_001840272.1 | 59894  | C | A   | 5p12     | 7.11  |
| NW_001840272.1 | 68401  | C | A   | 5p12     | 6.09  |
| NW_001840272.1 | 78574  | T | C   | 19q12    | 8.31  |
| NW_001840766.1 | 550    | C | G   | 20p11.1  | 6.47  |
| NW_001840766.1 | 1168   | T | C   | 20p11.1  | 6.31  |
| NW_001839547.1 | 38200  | C | A   | 20p11.21 | 6.11  |
| NW_001839547.1 | 44259  | C | T   | 20q11.22 | 6.36  |
| NW_001839547.1 | 51871  | G | A   | 20p11.21 | 6.92  |
| NW_001839547.1 | 53045  | G | A   | 20p11.1  | 8.38  |
| NW_001840567.1 | 1090   | A | T   | 10p11.21 | 7.01  |
| NW_001839257.1 | 170    | G | T   | 20q11.21 | 9.15  |
| NW_001839257.1 | 4940   | C | T   | 20q11.21 | 10.74 |
| NW_001839257.1 | 5793   | T | C   | 20q11.21 | 7.95  |
| NW_001839257.1 | 6528   | C | A   | 20p11.21 | 7.9   |
| NW_001839257.1 | 36691  | C | T   | 20q11.21 | 6.61  |
| NW_001839257.1 | 50249  | G | A   | 20q11.21 | 11.21 |
| NW_001839257.1 | 80709  | C | T   | 20q11.21 | 6.37  |
| NW_001839257.1 | 96503  | A | G   | 20q11.22 | 8.54  |
| NW_001839257.1 | 178710 | G | A   | 20q11.21 | 8.23  |
| NW_001839257.1 | 178754 | A | C   | 20q11.21 | 9.96  |
| NW_001839257.1 | 179445 | C | T   | 20q11.22 | 6.95  |
| NW_001839257.1 | 185138 | T | C   | 20q11.22 | 8.15  |
| NW_001839257.1 | 185163 | G | T   | 20q11.22 | 7.8   |
| NW_001839257.1 | 185585 | A | G   | 20q11.21 | 8.09  |
| NW_001839257.1 | 186217 | A | G   | 20p11.21 | 7.79  |
| NW_001839257.1 | 190051 | T | G   | 20q11.21 | 9.93  |
| NW_001839257.1 | 190708 | G | A   | 20q11.21 | 6.1   |
| NW_001839257.1 | 191129 | G | C   | 20q11.21 | 9.28  |
| NW_001839257.1 | 192603 | A | G   | 20q11.21 | 6.56  |
| NW_001839257.1 | 192958 | C | G   | 20q11.21 | 9.19  |
| NW_001839257.1 | 194621 | C | T   | 20p11.21 | 9.89  |
| NW_001839257.1 | 195205 | T | C   | 20q11.21 | 6.51  |
| NW_001839257.1 | 195559 | G | A   | 20q11.21 | 10.52 |
| NW_001839257.1 | 196441 | C | G   | 20q11.22 | 9.48  |
| NW_001839257.1 | 196554 | G | T   | 20q11.21 | 8.33  |

|                |        |   |     |               |       |
|----------------|--------|---|-----|---------------|-------|
| NW_001839257.1 | 197156 | A | G   | 20q11.21      | 8.51  |
| NW_001839257.1 | 198308 | A | T   | 20q11.21      | 9.43  |
| NW_001839257.1 | 199300 | C | T   | 20q11.22      | 11.18 |
| NW_001839257.1 | 200306 | G | A   | 20p11.21      | 9.1   |
| NW_001839257.1 | 202211 | G | C   | 20q11.21      | 10.39 |
| NW_001839257.1 | 202250 | A | C   | 20q11.21      | 8.46  |
| NW_001839257.1 | 202319 | G | A   | 20q11.21      | 6.81  |
| NW_001839257.1 | 203173 | C | T   | 20q11.21      | 9.76  |
| NW_001839257.1 | 203707 | C | T   | 20q11.22      | 11.17 |
| NW_001839257.1 | 204845 | C | T   | 20q11.21      | 11.92 |
| NW_001839257.1 | 205012 | T | C   | 20q11.21      | 9.77  |
| NW_001839257.1 | 205386 | G | T   | 20q11.21      | 10.02 |
| NW_001839257.1 | 206228 | A | G   | 20q11.21      | 8.36  |
| NW_001839257.1 | 207355 | C | G   | 20q11.21      | 7.78  |
| NW_001839257.1 | 208172 | T | C   | 20q11.22      | 7.98  |
| NW_001839257.1 | 209309 | A | T   | 20q11.21      | 7.5   |
| NW_001839257.1 | 210373 | T | C   | 20q11.21      | 17.96 |
| NW_001839257.1 | 210855 | C | T   | 20q11.21      | 7.82  |
| NW_001839257.1 | 211327 | G | T   | 20q11.21      | 11.91 |
| NW_001839257.1 | 211687 | C | A   | 20q11.21      | 9.82  |
| NW_001839257.1 | 211702 | G | A   | 20q11.21      | 9.26  |
| NW_001839257.1 | 211843 | G | A   | 20p11.21      | 9.77  |
| NW_001839257.1 | 212493 | A | G   | 20q11.21      | 9.14  |
| NW_001839257.1 | 212836 | G | C   | 20q11.21      | 8.39  |
| NW_001839257.1 | 214390 | C | T   | 20q11.21      | 10.33 |
| NW_001839257.1 | 214541 | C | A/G | 20q11.21      | 9.68  |
| NW_001839257.1 | 214762 | T | C   | 20q11.21      | 8.77  |
| NW_001839257.1 | 214782 | A | T   | 20q11.21      | 7.42  |
| NW_001839257.1 | 214798 | C | A   | 20p11.21      | 8.17  |
| NW_001839257.1 | 215208 | C | A   | 20q11.21      | 8.56  |
| NW_001839257.1 | 219007 | G | A   | 20q11.21      | 9.76  |
| NW_001839257.1 | 219024 | T | G   | 20q11.21      | 9.25  |
| NW_001839257.1 | 219425 | T | C   | 20q11.21      | 11.09 |
| NW_001839257.1 | 219561 | T | A   | 20q11.21      | 7.03  |
| NW_001839257.1 | 219564 | G | A   | 20q11.21      | 7.21  |
| NW_001839257.1 | 219566 | T | C   | 20q11.21      | 7.29  |
| NW_001839257.1 | 219701 | C | A   | 20q11.21      | 7.71  |
| NW_001839257.1 | 219705 | C | T   | 20q11.21      | 7.5   |
| NW_001839257.1 | 220711 | G | T   | 20q11.21      | 6.83  |
| NW_001839257.1 | 221008 | G | C   | 20q11.21      | 8.43  |
| NW_001839257.1 | 222115 | T | C   | 20p11.21      | 9.79  |
| NW_001839257.1 | 222374 | T | C   | 20q11.21      | 9.47  |
| NW_001839257.1 | 222477 | G | A   | 20q11.23      | 9.75  |
| NW_001839257.1 | 225222 | A | G   | 20q11.22      | 9.9   |
| NW_001840192.1 | 9628   | G | A   | 7p12.1        | 6.24  |
| NW_001840192.1 | 10399  | A | T   | 7p12.3        | 6.59  |
| NW_001840704.1 | 887    | G | A   | 7q22.1        | 7.12  |
| NW_001840704.1 | 902    | A | C   | 7q22.1        | 9.67  |
| NW_001840704.1 | 2861   | G | A   | 7q21.3-7q22.1 | 6.23  |
| NW_001840704.1 | 3419   | A | T   | 7q22.1        | 12.53 |
| NW_001839600.1 | 2357   | G | C   | 5p12          | 7.28  |
| NW_001839722.1 | 4000   | G | T   | 3p11.1        | 11.37 |
| NW_001841590.1 | 3683   | C | G   | 22q11.1       | 6.16  |

|                |       |   |     |                 |       |
|----------------|-------|---|-----|-----------------|-------|
| NW_001840060.1 | 2210  | C | T   | 7q11.21         | 7.22  |
| NW_001840060.1 | 12364 | G | T   | 7p11.2          | 8.21  |
| NW_001839481.1 | 10575 | C | T   | 10q11.21        | 8.05  |
| NW_001839840.1 | 3928  | A | G   | 14q11.2         | 7.48  |
| NW_001841056.1 | 1695  | C | G   | 18q11.2         | 6.81  |
| NW_001841056.1 | 1758  | G | C   | 18p11.21        | 18.86 |
| NW_001841056.1 | 3560  | G | C   | 18q11.2         | 8.52  |
| NW_001841056.1 | 3568  | C | A   | 18q11.2         | 8.06  |
| NW_001841056.1 | 3644  | T | G   | 18q11.2         | 8.42  |
| NW_001841056.1 | 3730  | T | A   | 18q11.2         | 7.9   |
| NW_001841056.1 | 3746  | A | T   | 18q11.1-18q11.2 | 6.63  |
| NW_001841056.1 | 3761  | T | G   | 18q11.2         | 6.66  |
| NW_001841056.1 | 3882  | T | C   | 18q11.2         | 7.04  |
| NW_001841056.1 | 4009  | C | T   | 18p11.21        | 10.47 |
| NW_001841056.1 | 4070  | C | A   | 18p11.21        | 16.22 |
| NW_001841056.1 | 4087  | G | A   | 18q11.2         | 7     |
| NW_001841056.1 | 4530  | C | T   | 18q11.2         | 11.32 |
| NW_001841056.1 | 4621  | T | C   | 18q11.1         | 8.44  |
| NW_001841056.1 | 4631  | T | G   | 18q11.2         | 12.24 |
| NW_001841056.1 | 4947  | G | C   | 18p11.21        | 6.01  |
| NW_001841056.1 | 5012  | A | G   | 18p11.21        | 10.23 |
| NW_001841056.1 | 5043  | C | T   | 18p11.21        | 8.15  |
| NW_001841056.1 | 5093  | G | A/T | 18p11.21        | 6.84  |
| NW_001841056.1 | 5141  | G | A   | 18p11.21        | 21.94 |
| NW_001841056.1 | 6988  | G | C   | 18p11.21        | 11.69 |
| NW_001841056.1 | 7034  | C | G/T | 18p11.21        | 11.43 |
| NW_001841056.1 | 7106  | T | C   | 18q11.2         | 6.69  |
| NW_001841056.1 | 7108  | C | A   | 18q11.1         | 10.38 |
| NW_001841056.1 | 7119  | G | C   | 18q11.2         | 9.78  |
| NW_001841056.1 | 7316  | C | T   | 18q11.2         | 6.92  |
| NW_001841056.1 | 7785  | A | T   | 18q11.2         | 6.81  |
| NW_001841056.1 | 7807  | C | T   | 18q11.2         | 8.67  |
| NW_001841056.1 | 7813  | T | C   | 18q11.2         | 11.3  |
| NW_001841056.1 | 8622  | G | C   | 18q11.2         | 17.31 |
| NW_001841056.1 | 8829  | G | C   | 18q11.2         | 14.01 |
| NW_001841056.1 | 9494  | T | C   | 18q11.2         | 17.52 |
| NW_001841056.1 | 9618  | C | G   | 18q11.2         | 10.61 |
| NW_001841056.1 | 10624 | T | C   | 18q11.2         | 14.34 |
| NW_001841056.1 | 10819 | G | T   | 18q11.2         | 18.97 |
| NW_001841056.1 | 12062 | G | C   | 18q11.2         | 14.17 |
| NW_001841056.1 | 13327 | T | C   | 18p11.21        | 7.72  |
| NW_001841056.1 | 13806 | A | T   | 18q11.1         | 10.72 |
| NW_001841056.1 | 14071 | T | A   | 18q11.2         | 9.32  |
| NW_001841056.1 | 14096 | C | G   | 18p11.21        | 11.45 |
| NW_001841056.1 | 14675 | T | A   | 18p11.21        | 8.09  |
| NW_001841056.1 | 15672 | A | C   | 18q11.1         | 6.44  |
| NW_001841056.1 | 16520 | G | A   | 18q11.1         | 9.18  |
| NW_001841056.1 | 16667 | A | G   | 18q11.2         | 8.4   |
| NW_001841056.1 | 16757 | G | A   | 18q11.2         | 12.94 |
| NW_001841056.1 | 17054 | T | C   | 18p11.21        | 9.2   |
| NW_001841056.1 | 17073 | A | C   | 18p11.21        | 9.67  |
| NW_001841056.1 | 19647 | A | T   | 18q11.2         | 7.68  |
| NW_001841056.1 | 20252 | A | C   | 18q11.2         | 7.42  |

|                |        |   |     |          |       |
|----------------|--------|---|-----|----------|-------|
| NW_001841056.1 | 20280  | C | G   | 18q11.2  | 9.87  |
| NW_001841056.1 | 20468  | T | C   | 18q11.2  | 6.09  |
| NW_001841056.1 | 24875  | C | G/T | 18p11.21 | 8.33  |
| NW_001839474.1 | 3052   | G | A   | 10q11.21 | 6.34  |
| NW_001839474.1 | 10823  | G | A   | 10q11.21 | 6.57  |
| NW_001839576.1 | 2987   | G | C   | 19p12    | 6.2   |
| NW_001839714.1 | 34848  | T | G   | 20p11.21 | 7.41  |
| NW_001839714.1 | 35163  | T | A   | 20p11.21 | 7.17  |
| NW_001839714.1 | 35885  | T | A/C | 20p11.21 | 8.15  |
| NW_001839714.1 | 35933  | A | C/G | 20q11.21 | 6.47  |
| NW_001839714.1 | 36027  | C | T   | 20p11.21 | 6.58  |
| NW_001839714.1 | 36413  | A | T   | 20p11.21 | 7.53  |
| NW_001839714.1 | 36466  | C | G/T | 20p11.21 | 6.88  |
| NW_001839258.1 | 12689  | C | T   | 7p12.3   | 6.04  |
| NW_001839258.1 | 22987  | G | A   | 7q11.21  | 6.82  |
| NW_001840490.1 | 3197   | G | A   | 1p11.2   | 7.61  |
| NW_001840490.1 | 3333   | A | C   | 1p11.2   | 6.23  |
| NW_001842144.1 | 3623   | C | T   | 21q11.2  | 6.25  |
| NW_001839268.1 | 1129   | C | T   | 20p11.1  | 6.72  |
| NW_001839268.1 | 1191   | A | C   | 20p11.21 | 8.33  |
| NW_001839268.1 | 1230   | C | T   | 20p11.21 | 7.74  |
| NW_001839268.1 | 1336   | A | G   | 20p11.21 | 6.57  |
| NW_001839268.1 | 1338   | T | G   | 20p11.21 | 7.31  |
| NW_001839268.1 | 1370   | C | T   | 20p11.21 | 7.71  |
| NW_001839268.1 | 3811   | C | A/T | 20p11.21 | 7.36  |
| NW_001839307.1 | 88     | G | T   | 5p12     | 6.11  |
| NW_001839705.1 | 38167  | G | A   | 1p11.2   | 6.51  |
| NW_001841150.1 | 2112   | A | T   | 1q21.1   | 6.52  |
| NW_001841150.1 | 2622   | G | A   | 1q21.1   | 8.31  |
| NW_001841150.1 | 31706  | G | A   | 1q21.1   | 7.4   |
| NW_001841150.1 | 98890  | C | A   | 1q21.1   | 6.14  |
| NW_001841150.1 | 102367 | T | C   | 1q21.1   | 7.83  |
| NW_001841150.1 | 143701 | C | T   | 1p11.2   | 7.59  |
| NW_001841150.1 | 147980 | C | T   | 1q21.1   | 11.64 |
| NW_001841150.1 | 166097 | T | C   | 1q21.1   | 7.64  |
| NW_001841150.1 | 174647 | C | A/G | 1q21.1   | 6.21  |
| NW_001841150.1 | 182753 | C | A   | 1q21.1   | 6.56  |
| NW_001841150.1 | 193557 | G | C   | 1q21.1   | 7.75  |
| NW_001841150.1 | 194342 | G | T   | 1p12     | 6.64  |
| NW_001841150.1 | 195442 | A | G   | 1q21.1   | 7.08  |
| NW_001840200.1 | 2954   | G | A   | 3q29     | 11.05 |
| NW_001840200.1 | 3604   | T | C   | 3q29     | 7.16  |
| NW_001840224.1 | 11902  | C | G   | 1q21.1   | 6.76  |
| NW_001841117.1 | 10027  | A | T   | 10p11.21 | 7.2   |
| NW_001839716.1 | 12222  | G | C/T | 13q13.3  | 6.54  |
| NW_001840172.1 | 3808   | G | A   | 1q21.1   | 6     |
| NW_001839718.1 | 2142   | G | A   | 1q21.1   | 10.6  |
| NW_001839718.1 | 2354   | T | C   | 1q21.1   | 6.36  |
| NW_001840050.1 | 359    | A | C   | 20q11.22 | 7.6   |
| NW_001840050.1 | 1455   | A | T   | 20q11.21 | 7.81  |
| NW_001840050.1 | 8647   | C | G   | 20p11.21 | 6.54  |
| NW_001840050.1 | 9227   | G | C   | 20q11.21 | 6.15  |
| NW_001840050.1 | 10006  | A | T   | 20p11.21 | 7.73  |

|                |       |   |     |          |       |
|----------------|-------|---|-----|----------|-------|
| NW_001840050.1 | 10061 | A | T   | 20p11.21 | 7.29  |
| NW_001840050.1 | 11008 | T | C   | 20p11.21 | 9.49  |
| NW_001840050.1 | 11299 | C | T   | 20p11.21 | 6.07  |
| NW_001840050.1 | 11460 | A | T   | 20q11.22 | 8     |
| NW_001840050.1 | 11478 | T | C   | 20p11.21 | 7.41  |
| NW_001840050.1 | 11493 | G | C   | 20p11.21 | 7.36  |
| NW_001840050.1 | 11505 | A | G   | 20p11.21 | 7.24  |
| NW_001840050.1 | 11642 | G | C   | 20p11.21 | 6.29  |
| NW_001840050.1 | 11677 | C | G/T | 20q11.21 | 7.8   |
| NW_001840050.1 | 11920 | T | C   | 20q11.21 | 8.21  |
| NW_001840009.1 | 1063  | T | C/G | 10q11.21 | 8.52  |
| NW_001840009.1 | 2881  | C | T   | 10p11.21 | 6.35  |
| NW_001840441.1 | 1967  | T | C   | 21q11.2  | 6.51  |
| NW_001840441.1 | 2018  | G | T   | 21q11.2  | 7.36  |
| NW_001840947.1 | 551   | G | A   | 9q21.12  | 6.48  |
| NW_001839405.1 | 12764 | A | C   | 2q11.1   | 14.65 |
| NW_001839405.1 | 12873 | G | A   | 2p11.2   | 6.12  |
| NW_001839405.1 | 13326 | T | C   | 2q11.2   | 9.66  |
| NW_001839405.1 | 13691 | T | C   | 2q11.2   | 8.75  |
| NW_001839405.1 | 13977 | T | C   | 2q11.1   | 11.23 |
| NW_001839405.1 | 14200 | T | C   | 2q11.2   | 8.33  |
| NW_001839405.1 | 15094 | A | G   | 2q11.1   | 6.46  |
| NW_001839405.1 | 15217 | T | C   | 2p11.2   | 8.13  |
| NW_001839405.1 | 15421 | T | C   | 2q11.2   | 6.63  |
| NW_001839405.1 | 15703 | T | C   | 2p11.2   | 8.75  |
| NW_001839405.1 | 15988 | G | A   | 2q11.2   | 8.67  |
| NW_001839405.1 | 16182 | G | A/C | 2p11.2   | 6.54  |
| NW_001839405.1 | 16610 | T | A   | 2p11.2   | 8.62  |
| NW_001839405.1 | 16677 | C | T   | 2q11.1   | 8.61  |
| NW_001839405.1 | 16793 | G | A   | 2p11.2   | 6.98  |
| NW_001839405.1 | 16965 | C | T   | 2q11.2   | 6.7   |
| NW_001839405.1 | 16989 | A | G   | 2p11.2   | 7.98  |
| NW_001840933.1 | 16945 | A | T   | 22q11.1  | 8.12  |
| NW_001840531.1 | 20310 | C | A   | 20q11.21 | 6.68  |
| NW_001840531.1 | 21518 | C | G   | 20q11.21 | 6.45  |
| NW_001840531.1 | 32185 | C | A   | 20q11.21 | 6.19  |
| NW_001841025.1 | 1719  | A | G   | 2p11.2   | 6.29  |
| NW_001841025.1 | 1733  | T | C   | 2p11.2   | 6.23  |
| NW_001841025.1 | 2410  | C | G   | 2q11.2   | 7.03  |
| NW_001841133.1 | 24779 | C | G   | 10p11.21 | 6.1   |
| NW_001841133.1 | 67896 | A | G   | 10p11.21 | 6.62  |
| NW_001841133.1 | 68000 | C | G   | 10p11.21 | 6.47  |
| NW_001841133.1 | 68119 | A | G   | 10p11.21 | 6.62  |
| NW_001841133.1 | 68895 | C | T   | 10p11.21 | 7.25  |
| NW_001841133.1 | 69308 | G | A/T | 10p11.21 | 15.12 |
| NW_001841133.1 | 69740 | G | A   | 10p11.21 | 11    |
| NW_001841133.1 | 69885 | T | A   | 10p11.21 | 6.99  |
| NW_001841133.1 | 70575 | G | A   | 10p11.21 | 7.78  |
| NW_001841133.1 | 70719 | A | G   | 10q11.21 | 6.18  |
| NW_001841133.1 | 70939 | A | G   | 10q11.21 | 14.96 |
| NW_001841133.1 | 71050 | T | C   | 10q11.21 | 7.11  |
| NW_001841133.1 | 71350 | G | C   | 10q11.22 | 7.17  |
| NW_001841133.1 | 72042 | C | A   | 10p11.21 | 7.51  |



|                |        |   |     |               |       |
|----------------|--------|---|-----|---------------|-------|
| NW_001841133.1 | 72273  | G | A   | 10p11.21      | 10.33 |
| NW_001841133.1 | 72369  | C | A   | 10p11.21      | 6.6   |
| NW_001841133.1 | 72474  | C | A   | 10q11.21      | 7.5   |
| NW_001841133.1 | 72888  | A | T   | 10p11.21      | 11.07 |
| NW_001841133.1 | 72891  | T | A   | 10p11.21      | 8.66  |
| NW_001841133.1 | 72894  | C | A   | 10q11.21      | 8.44  |
| NW_001841133.1 | 72896  | C | T   | 10p11.21      | 11.47 |
| NW_001841133.1 | 72969  | T | G   | 10p11.21      | 15.99 |
| NW_001841133.1 | 73461  | T | G   | 10p11.21      | 6.01  |
| NW_001841133.1 | 74395  | G | A   | 10q11.21      | 6.02  |
| NW_001841133.1 | 74557  | C | A   | 10p11.21      | 8.12  |
| NW_001841133.1 | 74736  | C | G   | 10q11.21      | 9.18  |
| NW_001841133.1 | 78386  | C | T   | 10p11.21      | 12.64 |
| NW_001841133.1 | 78728  | G | A/T | 10p11.21      | 12.82 |
| NW_001841133.1 | 79305  | C | T   | 10p11.21      | 7.89  |
| NW_001841133.1 | 80175  | C | G   | 10q11.21      | 7.48  |
| NW_001841133.1 | 81530  | C | T   | 10p11.21      | 6.35  |
| NW_001841133.1 | 84111  | A | G   | 10q11.21      | 6.64  |
| NW_001841133.1 | 84529  | C | T   | 10p11.21      | 6.06  |
| NW_001841133.1 | 89436  | C | T   | 10p11.21      | 8.79  |
| NW_001841133.1 | 89533  | G | A   | 10p11.21      | 9.59  |
| NW_001841133.1 | 120511 | T | A   | 10p11.21      | 6.8   |
| NW_001841133.1 | 161351 | A | T   | 10p11.21      | 6.66  |
| NW_001841133.1 | 188367 | A | G   | 10p11.21      | 7.78  |
| NW_001841133.1 | 197788 | A | T   | 10p11.21      | 6.96  |
| NW_001841133.1 | 202426 | G | A   | 10p11.21      | 6.44  |
| NW_001841133.1 | 207955 | C | T   | 10p11.21      | 8.78  |
| NW_001841133.1 | 216744 | C | T   | 10p11.21      | 8.27  |
| NW_001841133.1 | 219852 | T | A   | 10p11.21      | 6.74  |
| NW_001841133.1 | 268478 | C | G   | 10p11.21      | 6.39  |
| NW_001841133.1 | 289989 | C | T   | 10p11.21      | 9.7   |
| NW_001841133.1 | 372911 | C | A   | 10q11.21      | 6.74  |
| NW_001841133.1 | 495483 | T | G   | 10p11.21      | 9.14  |
| NW_001841133.1 | 498762 | C | A   | 10q11.21      | 6.29  |
| NW_001841133.1 | 504086 | A | C   | 10p11.21      | 7.36  |
| NW_001841133.1 | 539145 | C | T   | 10p11.21      | 6.89  |
| NW_001841133.1 | 553730 | C | A   | 10p11.21      | 7.31  |
| NW_001841133.1 | 558657 | G | C   | 10q11.21      | 7.07  |
| NW_001841133.1 | 571873 | C | T   | 10p11.21      | 6.53  |
| NW_001841133.1 | 580897 | C | T   | 10p11.21      | 8.74  |
| NW_001841133.1 | 589377 | G | T   | 10p11.21      | 7.09  |
| NW_001841133.1 | 611464 | A | G   | 10p11.21      | 7.15  |
| NW_001841768.1 | 9939   | C | T   | 2p11.1-2q11.1 | 6.62  |
| NW_001840780.1 | 2745   | T | C   | 20p11.21      | 10.83 |
| NW_001840780.1 | 3431   | A | G   | 20q11.21      | 6.97  |
| NW_001840780.1 | 4689   | T | C   | 20q11.22      | 6.51  |
| NW_001840780.1 | 4746   | T | C   | 20q11.21      | 10.02 |
| NW_001840780.1 | 6503   | A | G   | 20q11.22      | 11.28 |
| NW_001840780.1 | 6531   | G | C   | 20q11.21      | 6.92  |
| NW_001840780.1 | 7598   | T | A   | 20q11.23      | 6     |
| NW_001840780.1 | 7878   | G | T   | 20q11.21      | 8.98  |
| NW_001840780.1 | 7940   | T | A   | 20q11.21      | 6.62  |
| NW_001840780.1 | 9095   | A | G   | 20q11.21      | 9.69  |

|                |       |   |   |          |       |
|----------------|-------|---|---|----------|-------|
| NW_001840780.1 | 9195  | A | G | 20q11.21 | 10.18 |
| NW_001840780.1 | 10618 | A | T | 20q11.21 | 6.34  |
| NW_001840780.1 | 10819 | G | T | 20q11.21 | 6     |
| NW_001840780.1 | 11393 | T | A | 20q11.21 | 9.71  |
| NW_001840780.1 | 11969 | A | C | 20q11.21 | 9.64  |
| NW_001840780.1 | 12571 | C | T | 20q11.21 | 9.42  |
| NW_001840780.1 | 13891 | A | T | 20q11.22 | 6.48  |
| NW_001840780.1 | 15675 | A | G | 20q11.21 | 8.35  |
| NW_001840780.1 | 16239 | G | T | 20q11.21 | 9.88  |
| NW_001840780.1 | 16972 | T | C | 20q11.21 | 10.51 |
| NW_001840780.1 | 17195 | G | T | 20q11.21 | 6.04  |
| NW_001840780.1 | 18306 | A | G | 20q11.21 | 7.6   |
| NW_001840780.1 | 19538 | G | A | 20q11.21 | 6.52  |
| NW_001840780.1 | 20573 | G | A | 20q11.22 | 11.52 |
| NW_001840780.1 | 21186 | C | G | 20q11.21 | 7.41  |
| NW_001840780.1 | 21296 | C | T | 20q11.21 | 6.71  |
| NW_001840780.1 | 22191 | C | G | 20q11.21 | 9.63  |
| NW_001840780.1 | 22235 | C | T | 20q11.21 | 8.7   |
| NW_001840780.1 | 22426 | A | G | 20q11.22 | 6.73  |
| NW_001840780.1 | 23228 | C | T | 20q11.22 | 7.68  |
| NW_001840780.1 | 24163 | T | A | 20q11.21 | 8.19  |
| NW_001840780.1 | 25484 | G | A | 20q11.21 | 7.51  |
| NW_001840780.1 | 30297 | G | T | 20q11.21 | 6.62  |
| NW_001840780.1 | 31454 | G | A | 20q11.21 | 6.19  |
| NW_001840780.1 | 33103 | A | C | 20q11.21 | 7.19  |
| NW_001840780.1 | 33189 | C | T | 20q11.21 | 7.92  |
| NW_001840780.1 | 33641 | C | T | 20q11.21 | 9.73  |
| NW_001840780.1 | 36450 | G | T | 20q11.21 | 9.88  |
| NW_001840780.1 | 37782 | C | T | 20q11.21 | 9.28  |
| NW_001840780.1 | 38697 | C | T | 20q11.21 | 6.31  |
| NW_001840780.1 | 39510 | C | A | 20q11.21 | 9.94  |
| NW_001840780.1 | 39702 | A | G | 20q11.21 | 6.93  |
| NW_001840780.1 | 39842 | G | A | 20q11.21 | 9.52  |
| NW_001840780.1 | 41174 | T | G | 20q11.21 | 14.41 |
| NW_001840780.1 | 42538 | A | G | 20q11.22 | 9.07  |
| NW_001840780.1 | 44817 | G | A | 20q11.21 | 9.77  |
| NW_001840780.1 | 45030 | T | C | 20q11.21 | 7.9   |
| NW_001840780.1 | 45404 | T | G | 20q11.21 | 9.9   |
| NW_001840780.1 | 46137 | C | A | 20q11.21 | 9.58  |
| NW_001840780.1 | 49356 | C | T | 20q11.21 | 7.62  |
| NW_001840780.1 | 49871 | G | A | 20q11.21 | 10.82 |
| NW_001840780.1 | 49968 | G | A | 20q11.21 | 6.62  |
| NW_001840780.1 | 50124 | A | G | 20q11.21 | 8.79  |
| NW_001840780.1 | 51053 | T | A | 20q11.21 | 9.45  |
| NW_001840780.1 | 54062 | G | T | 20q11.21 | 8.95  |
| NW_001840780.1 | 56292 | A | G | 20q11.21 | 7.58  |
| NW_001840780.1 | 57060 | C | T | 20q11.21 | 6.4   |
| NW_001840780.1 | 59382 | T | C | 20q11.21 | 8.02  |
| NW_001840780.1 | 61429 | G | A | 20q11.21 | 6.71  |
| NW_001840780.1 | 61678 | A | C | 20q11.21 | 7.35  |
| NW_001840780.1 | 61897 | A | G | 20q11.21 | 7.78  |
| NW_001840780.1 | 62247 | G | A | 20q11.21 | 7.46  |
| NW_001840780.1 | 65866 | G | A | 20q11.22 | 7.02  |

|                |       |   |     |          |       |
|----------------|-------|---|-----|----------|-------|
| NW_001840780.1 | 66555 | C | G   | 20q11.21 | 8.22  |
| NW_001840780.1 | 66971 | T | C   | 20q11.21 | 8.81  |
| NW_001840780.1 | 69696 | T | C   | 20q11.21 | 6.64  |
| NW_001840780.1 | 71908 | G | T   | 20q11.21 | 7.26  |
| NW_001840780.1 | 76437 | G | A/C | 20q11.21 | 6.34  |
| NW_001840780.1 | 78599 | G | A   | 20q11.21 | 6.44  |
| NW_001840780.1 | 83048 | T | A   | 20q11.21 | 9.25  |
| NW_001840780.1 | 83946 | T | A   | 20q11.21 | 9.19  |
| NW_001840780.1 | 85742 | C | A   | 20p11.1  | 8.18  |
| NW_001840780.1 | 85957 | G | C   | 20q11.21 | 6.76  |
| NW_001840780.1 | 86320 | A | G   | 20q11.21 | 8.86  |
| NW_001840780.1 | 88100 | T | C   | 20q11.21 | 8.64  |
| NW_001840780.1 | 88508 | T | C   | 20q11.21 | 6.87  |
| NW_001840780.1 | 89006 | T | C   | 20q11.21 | 7.93  |
| NW_001840780.1 | 89037 | A | G   | 20q11.21 | 10.56 |
| NW_001840711.1 | 3571  | A | T   | 14q11.2  | 6.65  |
| NW_001839485.1 | 12029 | T | C   | 5p13.1   | 6.28  |
| NW_001841099.1 | 1594  | A | G   | 20p11.21 | 7.04  |
| NW_001841099.1 | 8922  | A | G   | 20p11.21 | 6.24  |
| NW_001841099.1 | 12860 | A | T   | 20p11.21 | 6.26  |
| NW_001841099.1 | 13706 | G | A   | 20p11.21 | 7.63  |
| NW_001841099.1 | 14146 | T | C   | 20p11.21 | 7.46  |
| NW_001841099.1 | 14324 | T | G   | 20p11.21 | 6.95  |
| NW_001841099.1 | 14619 | A | T   | 20p11.21 | 6.59  |
| NW_001841099.1 | 15731 | T | C   | 20p11.21 | 6.72  |
| NW_001841099.1 | 15973 | C | T   | 20p11.21 | 6.58  |
| NW_001841099.1 | 19999 | C | A   | 20p11.21 | 8.36  |
| NW_001841099.1 | 21406 | A | C   | 20q11.22 | 6.52  |
| NW_001841099.1 | 21768 | C | G   | 20p11.21 | 6.38  |
| NW_001841099.1 | 24548 | A | G   | 20p11.21 | 7.77  |
| NW_001840621.1 | 1869  | C | T   | 5q11.1   | 6.71  |
| NW_001841516.1 | 2245  | C | T   | 2q11.2   | 6.16  |
| NW_001841516.1 | 3139  | C | T   | 2p11.2   | 6.74  |
| NW_001841516.1 | 3300  | G | A   | 2q11.1   | 7.81  |
| NW_001841516.1 | 4678  | G | A   | 2q11.2   | 6.55  |
| NW_001841516.1 | 6570  | A | G   | 2q11.2   | 7.73  |
| NW_001841516.1 | 6672  | G | A   | 2p11.2   | 6.98  |
| NW_001841516.1 | 8106  | G | A   | 2q11.2   | 6.05  |
| NW_001841516.1 | 8577  | G | C   | 2q11.2   | 7.7   |
| NW_001841516.1 | 8869  | T | A   | 2q11.2   | 6.95  |
| NW_001841091.1 | 3833  | A | G   | 18q11.1  | 8.71  |
| NW_001841091.1 | 4722  | A | T   | 18p11.21 | 7.73  |
| NW_001841091.1 | 5666  | C | A/G | 18q11.2  | 15.3  |
| NW_001841091.1 | 5704  | T | G   | 18q11.2  | 15.93 |
| NW_001841091.1 | 5747  | T | A   | 18q11.2  | 6.64  |
| NW_001841091.1 | 6252  | C | G   | 18q11.2  | 8.7   |
| NW_001841091.1 | 7422  | A | C   | 18p11.21 | 18.27 |
| NW_001841091.1 | 7643  | T | A   | 18q11.2  | 7.22  |
| NW_001841091.1 | 8349  | A | C   | 18q11.2  | 7.79  |
| NW_001841091.1 | 8379  | T | A   | 18q11.2  | 6.58  |
| NW_001841091.1 | 8869  | G | T   | 18q11.2  | 9.38  |
| NW_001841091.1 | 8880  | A | G   | 18p11.21 | 9.82  |
| NW_001841091.1 | 8890  | G | C/T | 18q11.2  | 9.52  |

|                |        |   |     |          |       |
|----------------|--------|---|-----|----------|-------|
| NW_001841091.1 | 8940   | G | T   | 18q11.2  | 6.02  |
| NW_001841091.1 | 8954   | T | A   | 18q11.2  | 10.92 |
| NW_001841091.1 | 8962   | C | A   | 18q11.2  | 10.8  |
| NW_001841091.1 | 8973   | T | G   | 18p11.21 | 11.73 |
| NW_001841091.1 | 9061   | T | G   | 18q11.1  | 6.04  |
| NW_001841091.1 | 9070   | C | G   | 18q11.2  | 6.5   |
| NW_001841091.1 | 9092   | G | C   | 18q11.2  | 17.42 |
| NW_001841091.1 | 9939   | T | C   | 18q11.1  | 6.33  |
| NW_001841091.1 | 9989   | A | C   | 18q11.1  | 6.42  |
| NW_001841091.1 | 10524  | C | G   | 18q11.2  | 8.45  |
| NW_001841091.1 | 10708  | G | T   | 18q11.2  | 6.62  |
| NW_001841091.1 | 11194  | G | A   | 18q11.2  | 7.06  |
| NW_001841091.1 | 11253  | C | G/T | 18q11.2  | 6.07  |
| NW_001841091.1 | 11642  | T | C   | 18q11.1  | 9.08  |
| NW_001841091.1 | 11964  | A | C   | 18q11.2  | 13.35 |
| NW_001841091.1 | 11965  | G | A   | 18q11.2  | 13.33 |
| NW_001841091.1 | 12378  | T | G   | 18q11.1  | 8     |
| NW_001841091.1 | 12384  | G | C   | 18q11.2  | 6.89  |
| NW_001841091.1 | 12435  | A | T   | 18q11.2  | 6.68  |
| NW_001841091.1 | 12774  | G | A   | 18p11.21 | 6.84  |
| NW_001841091.1 | 12813  | G | T   | 18p11.21 | 7.63  |
| NW_001841091.1 | 13180  | T | G   | 18q11.2  | 7.97  |
| NW_001841091.1 | 13409  | A | T   | 18q11.2  | 6.57  |
| NW_001841091.1 | 13539  | C | T   | 18q11.1  | 10.29 |
| NW_001841091.1 | 13672  | A | G   | 18p11.21 | 9.94  |
| NW_001841091.1 | 14584  | A | C   | 18q11.2  | 6.21  |
| NW_001841091.1 | 15846  | C | A   | 18q11.2  | 6.1   |
| NW_001841091.1 | 15894  | T | A   | 18q11.2  | 7.86  |
| NW_001841091.1 | 16732  | C | G   | 18q11.2  | 7.94  |
| NW_001841091.1 | 17195  | A | C/G | 18q11.2  | 9.18  |
| NW_001841091.1 | 17349  | T | G   | 18p11.21 | 10.37 |
| NW_001841091.1 | 17675  | G | A   | 18q11.1  | 9.24  |
| NW_001841091.1 | 17710  | A | G   | 18q11.2  | 8.77  |
| NW_001841091.1 | 18167  | C | G   | 18q11.2  | 6.71  |
| NW_001839898.1 | 9459   | C | T   | 20p11.21 | 6.1   |
| NW_001839898.1 | 10872  | G | C   | 20q11.22 | 6.48  |
| NW_001839898.1 | 12442  | T | C   | 20q11.21 | 6.64  |
| NW_001840347.1 | 16907  | G | T   | 9p13.1   | 6.19  |
| NW_001839760.1 | 16361  | G | A   | 17q11.2  | 7.34  |
| NW_001839760.1 | 47295  | T | C   | 17q11.2  | 6.08  |
| NW_001839760.1 | 134751 | G | A   | 17q11.2  | 7.01  |
| NW_001839760.1 | 144003 | C | T   | 17q11.2  | 6.73  |
| NW_001839760.1 | 154731 | G | A   | 17q11.2  | 8.73  |
| NW_001839760.1 | 173222 | G | A   | 17q11.2  | 7.96  |
| NW_001839760.1 | 174786 | T | C   | 17q11.2  | 7.56  |
| NW_001839760.1 | 208278 | G | A   | 17q11.2  | 6.2   |
| NW_001839760.1 | 210797 | G | A   | 17q11.2  | 8.62  |
| NW_001839760.1 | 216664 | G | A   | 17q11.2  | 8.41  |
| NW_001839760.1 | 231403 | T | A/C | 17q11.2  | 13.84 |
| NW_001840592.1 | 1210   | G | A   | 9q21.12  | 6.06  |
| NW_001840871.1 | 26436  | C | T   | 22q11.1  | 6.25  |
| NW_001840871.1 | 36147  | A | C/T | 22q11.1  | 8.51  |
| NW_001840871.1 | 96644  | A | G   | 22q11.1  | 8.65  |

|                |        |   |     |          |      |
|----------------|--------|---|-----|----------|------|
| NW_001840871.1 | 99017  | G | A   | 22q11.1  | 9.09 |
| NW_001839822.1 | 11071  | G | A   | 9q21.12  | 6.94 |
| NW_001839822.1 | 31814  | T | A/C | 9q21.12  | 6.33 |
| NW_001841388.1 | 3900   | A | G   | 22q11.1  | 6.11 |
| NW_001841149.1 | 195626 | T | C   | 2q21.2   | 7.85 |
| NW_001841149.1 | 196012 | A | T   | 2q21.2   | 8.11 |
| NW_001841149.1 | 196051 | A | T   | 2q21.2   | 9.43 |
| NW_001841149.1 | 196119 | A | T   | 2q21.2   | 8.37 |
| NW_001841149.1 | 196124 | C | G   | 2q21.2   | 8.33 |
| NW_001840348.1 | 6      | A | G   | 20q11.21 | 6.27 |
| NW_001840348.1 | 786    | G | C   | 20p11.1  | 7.24 |
| NW_001840348.1 | 1151   | G | A   | 20q11.22 | 7.53 |
| NW_001840348.1 | 1785   | T | C   | 20q11.22 | 7.21 |
| NW_001840348.1 | 2054   | C | T   | 20q11.22 | 7.17 |
| NW_001840348.1 | 2417   | A | T   | 20q11.21 | 6.47 |
| NW_001840348.1 | 2837   | A | T   | 20q11.22 | 6.51 |
| NW_001840348.1 | 7516   | G | T   | 20p11.1  | 8.24 |
| NW_001840348.1 | 8597   | G | C   | 20p11.21 | 6.31 |
| NW_001840348.1 | 10084  | T | G   | 20p11.21 | 6.63 |
| NW_001840348.1 | 10216  | G | C   | 20p11.21 | 7.54 |
| NW_001840348.1 | 10360  | G | C   | 20p11.21 | 8.36 |
| NW_001840348.1 | 39269  | A | G   | 20q11.21 | 7.56 |
| NW_001840348.1 | 40509  | G | C/T | 20p11.21 | 6.07 |
| NW_001840348.1 | 41805  | A | G/T | 20p11.1  | 8.47 |
| NW_001840348.1 | 46546  | C | A   | 20p11.21 | 7.68 |
| NW_001840348.1 | 47713  | A | G   | 20q11.21 | 6.96 |
| NW_001840348.1 | 47909  | T | G   | 20p11.21 | 6.16 |
| NW_001840348.1 | 47968  | C | G   | 20p11.21 | 7.84 |
| NW_001840348.1 | 52981  | A | T   | 20p11.21 | 6.61 |
| NW_001840348.1 | 56657  | A | G   | 20p11.1  | 7.01 |
| NW_001840348.1 | 57708  | C | G   | 20q11.21 | 6.66 |
| NW_001840348.1 | 73635  | G | A   | 20q11.21 | 6.54 |
| NW_001840348.1 | 75932  | G | A   | 20p11.21 | 7.06 |
| NW_001840348.1 | 76466  | T | C   | 20q11.22 | 8.34 |
| NW_001841078.1 | 3309   | T | A/G | 20q11.21 | 6.29 |
| NW_001841078.1 | 10403  | C | A   | 20q11.21 | 6.91 |
| NW_001841078.1 | 12485  | T | A   | 20q11.21 | 6.76 |
| NW_001841078.1 | 13065  | C | A   | 20q11.22 | 7.42 |
| NW_001841078.1 | 13266  | T | G   | 20q11.22 | 6.05 |
| NW_001841078.1 | 13267  | T | G   | 20q11.22 | 6.24 |
| NW_001840814.1 | 934    | T | A   | 20p11.21 | 7.26 |
| NW_001840814.1 | 1005   | T | G   | 20q11.21 | 6.87 |
| NW_001840814.1 | 1030   | C | G   | 20q11.21 | 6.6  |
| NW_001840814.1 | 9854   | T | A   | 20p11.21 | 6.45 |
| NW_001840814.1 | 10824  | G | A   | 20p11.21 | 7.83 |
| NW_001841981.1 | 1296   | G | C   | 21q11.2  | 6.27 |
| NW_001840549.1 | 1700   | G | T   | 9q34.11  | 6.14 |
| NW_001839689.1 | 1775   | C | G   | 14q11.2  | 6.83 |
| NW_001839689.1 | 4280   | G | C   | 14q11.2  | 6.28 |
| NW_001841147.1 | 1205   | G | T   | 20q11.21 | 7.04 |
| NW_001841147.1 | 1497   | C | G   | 20p11.21 | 7.21 |
| NW_001841147.1 | 1608   | G | C   | 20q11.21 | 6.93 |
| NW_001841147.1 | 1707   | C | A   | 20p11.21 | 6.6  |

|                |        |   |     |          |       |
|----------------|--------|---|-----|----------|-------|
| NW_001841147.1 | 2465   | C | T   | 20q11.21 | 6.29  |
| NW_001841147.1 | 13276  | C | G   | 20q11.21 | 6.85  |
| NW_001841147.1 | 13604  | C | A/T | 20q11.21 | 6.39  |
| NW_001841147.1 | 13763  | C | A/G | 20p11.21 | 6.71  |
| NW_001841147.1 | 14445  | G | A   | 20p11.21 | 7.37  |
| NW_001839317.1 | 5192   | G | A   | 1q32.1   | 6.68  |
| NW_001839317.1 | 8313   | G | A   | 1q32.1   | 6.4   |
| NW_001839317.1 | 11555  | C | T   | 1q32.1   | 14.44 |
| NW_001839317.1 | 13343  | C | T   | 1q32.1   | 6.85  |
| NW_001839317.1 | 13607  | G | T   | 1q32.1   | 11.56 |
| NW_001839317.1 | 13701  | C | T   | 1q32.1   | 12.94 |
| NW_001839317.1 | 13784  | G | A   | 1q32.1   | 13.27 |
| NW_001839317.1 | 15408  | T | G   | 1q32.1   | 8.7   |
| NW_001839317.1 | 20080  | C | T   | 1q32.1   | 6.75  |
| NW_001839317.1 | 20258  | C | T   | 1q32.1   | 6.33  |
| NW_001839744.1 | 20138  | A | C   | 22q11.1  | 7.17  |
| NW_001840538.1 | 20504  | G | T   | 9q21.11  | 7.14  |
| NW_001839286.1 | 11898  | G | A   | 1q21.1   | 7.48  |
| NW_001840164.1 | 2251   | T | A   | 1q21.1   | 7.26  |
| NW_001840164.1 | 2662   | G | A   | 1q21.1   | 11.23 |
| NW_001840862.1 | 327    | T | C   | 12q12    | 10.02 |
| NW_001840862.1 | 937    | G | A   | 12q12    | 12.92 |
| NW_001840862.1 | 1682   | A | G   | 12q12    | 6.9   |
| NW_001840862.1 | 2311   | T | G   | 12q12    | 6.72  |
| NW_001840862.1 | 2694   | T | C   | 12p11.1  | 11.19 |
| NW_001841101.1 | 511    | A | T   | 14q11.2  | 6.23  |
| NW_001839852.1 | 3275   | A | G   | 9q21.12  | 6.24  |
| NW_001840472.1 | 2149   | T | C   | 10p11.21 | 7.24  |
| NW_001839932.1 | 765    | A | T   | 19p12    | 7.2   |
| NW_001840932.1 | 245    | A | G   | 12q12    | 7.48  |
| NW_001840932.1 | 339    | G | C   | 12q12    | 9.5   |
| NW_001840932.1 | 619    | C | T   | 12q12    | 8.99  |
| NW_001840932.1 | 767    | A | G   | 12q12    | 10.86 |
| NW_001840932.1 | 1076   | A | T   | 12q12    | 7.99  |
| NW_001840932.1 | 1643   | G | C/T | 12q12    | 6.18  |
| NW_001840932.1 | 2984   | A | T   | 12q11    | 7.46  |
| NW_001841035.1 | 1492   | T | C   | 20q11.21 | 7.25  |
| NW_001841035.1 | 2353   | A | T   | 20q11.21 | 8.45  |
| NW_001840806.1 | 2376   | G | T   | 21q11.2  | 7.45  |
| NW_001839952.1 | 1352   | C | T   | 20q11.21 | 7.71  |
| NW_001841011.1 | 9894   | T | A   | 1q21.1   | 8.73  |
| NW_001841011.1 | 15934  | G | A   | 1p12     | 9.83  |
| NW_001841011.1 | 22664  | C | T   | 1p12     | 9.02  |
| NW_001841011.1 | 52319  | A | T   | 1q21.1   | 6.28  |
| NW_001841011.1 | 98319  | G | A   | 1q21.1   | 9.03  |
| NW_001841011.1 | 122837 | C | T   | 1q21.1   | 9.43  |
| NW_001841011.1 | 147241 | G | T   | 1q21.1   | 9.3   |
| NW_001841011.1 | 162448 | G | T   | 1p11.2   | 6.31  |
| NW_001841011.1 | 191699 | C | A   | 1q21.1   | 6.52  |
| NW_001841011.1 | 223193 | C | T   | 1q21.1   | 7.19  |
| NW_001841011.1 | 224957 | G | A   | 1q21.1   | 7.39  |
| NW_001841011.1 | 227268 | C | A   | 1q21.1   | 6.65  |
| NW_001841011.1 | 244605 | C | A/G | 1q21.1   | 7.54  |

|                |        |   |     |          |      |
|----------------|--------|---|-----|----------|------|
| NW_001841011.1 | 245364 | T | A   | 1q21.1   | 7.45 |
| NW_001841068.1 | 500    | G | T   | 13q11    | 7.05 |
| NW_001839653.1 | 2336   | T | A   | 3p12.1   | 6.13 |
| NW_001840274.1 | 2287   | C | G   | 14q11.2  | 6.64 |
| NW_001840993.1 | 790    | T | C   | 20p11.21 | 6.35 |
| NW_001840993.1 | 1158   | A | T   | 20p11.21 | 7.4  |
| NW_001840993.1 | 2952   | A | T   | 20q11.21 | 7.39 |
| NW_001840993.1 | 9724   | A | G/T | 20q11.21 | 8.16 |
| NW_001840993.1 | 10590  | T | C   | 20q11.22 | 6.31 |
| NW_001839455.1 | 74623  | G | A   | 17p11.2  | 7.14 |
| NW_001839455.1 | 127928 | G | A   | 17q11.2  | 6.76 |
| NW_001839455.1 | 132165 | G | A   | 17p11.2  | 6.31 |
| NW_001839455.1 | 132606 | C | T   | 17q11.2  | 6.99 |
| NW_001839455.1 | 134135 | G | T   | 17p11.2  | 9.15 |
| NW_001839455.1 | 134862 | C | T   | 17p11.2  | 8.2  |
| NW_001839470.1 | 10590  | C | T   | 1q21.1   | 7.61 |
| NW_001840418.1 | 37444  | C | G   | 9p13.1   | 6.42 |
| NW_001840413.1 | 130    | C | T   | 20p11.21 | 6.78 |
| NW_001840413.1 | 12368  | G | T   | 20p11.21 | 7.41 |
| NW_001840413.1 | 14214  | A | C/T | 20q11.21 | 6.68 |
| NW_001840413.1 | 14414  | A | T   | 20q11.21 | 6.79 |
| NW_001840944.1 | 1627   | C | A   | 14q11.2  | 6.22 |
| NW_001839966.1 | 144    | G | T   | 20p11.21 | 6.41 |
| NW_001839966.1 | 473    | G | A   | 20q11.21 | 6.7  |
| NW_001839966.1 | 518    | G | C   | 20p11.21 | 6.94 |
| NW_001839966.1 | 1253   | G | C   | 20q11.21 | 7.64 |
| NW_001839966.1 | 1391   | C | A/G | 20p11.21 | 6.14 |
| NW_001839966.1 | 2978   | C | G   | 20p11.21 | 8.96 |
| NW_001839966.1 | 3483   | T | C   | 20p11.21 | 8.35 |
| NW_001839966.1 | 3488   | G | A   | 20q11.22 | 7.21 |
| NW_001839966.1 | 3602   | A | G   | 20q11.22 | 6.39 |
| NW_001839966.1 | 3995   | T | A   | 20q11.21 | 8.88 |
| NW_001839966.1 | 4160   | T | A   | 20p11.21 | 9.49 |
| NW_001839966.1 | 4598   | G | A   | 20q11.22 | 9.24 |
| NW_001839966.1 | 4983   | A | T   | 20p11.1  | 8.78 |
| NW_001839774.1 | 24276  | T | C/G | 12q12    | 6.71 |
| NW_001839590.1 | 1346   | G | A   | 20p11.21 | 6.27 |
| NW_001839590.1 | 1357   | T | C   | 20q11.21 | 7.65 |
| NW_001839590.1 | 1749   | T | A   | 20p11.21 | 6.27 |
| NW_001839590.1 | 2727   | A | G   | 20q11.22 | 6.22 |
| NW_001840232.1 | 551    | C | G/T | 20p11.21 | 7.63 |
| NW_001840232.1 | 721    | A | G   | 20q11.21 | 6.72 |
| NW_001840232.1 | 736    | C | T   | 20q11.21 | 8.35 |
| NW_001840232.1 | 855    | A | C   | 20p11.21 | 7.09 |
| NW_001840232.1 | 857    | T | C   | 20q11.21 | 8.01 |
| NW_001840232.1 | 1055   | A | G   | 20p11.21 | 6.62 |
| NW_001840386.1 | 666    | A | C   | 9q21.12  | 6.9  |
| NW_001840386.1 | 683    | T | A   | 9q21.12  | 6.96 |
| NW_001839441.1 | 11176  | A | T   | 14q11.2  | 6.34 |
| NW_001839429.1 | 9643   | A | G   | 9q21.12  | 6.04 |
| NW_001841160.1 | 1307   | A | T   | 7p11.2   | 6.1  |
| NW_001841160.1 | 2656   | T | G   | 7q11.21  | 6.14 |
| NW_001841160.1 | 4290   | T | C   | 7p12.1   | 7.76 |

|                |        |   |     |          |       |
|----------------|--------|---|-----|----------|-------|
| NW_001841160.1 | 11821  | G | A   | 7p12.3   | 8.42  |
| NW_001841160.1 | 11875  | G | A/C | 7p12.3   | 6.64  |
| NW_001841160.1 | 12360  | T | C   | 7q11.22  | 9.09  |
| NW_001841160.1 | 12525  | A | G   | 7p12.1   | 6.3   |
| NW_001841160.1 | 13480  | T | A   | 7p12.3   | 7.46  |
| NW_001841160.1 | 14173  | G | C   | 7p12.3   | 6.53  |
| NW_001841160.1 | 24684  | T | C   | 7p12.1   | 7.2   |
| NW_001841160.1 | 25244  | C | T   | 7p11.2   | 7.61  |
| NW_001841160.1 | 25669  | T | A   | 7p11.2   | 6.58  |
| NW_001841160.1 | 25680  | C | T   | 7q11.22  | 6.42  |
| NW_001841160.1 | 27348  | T | C   | 7p12.2   | 6.45  |
| NW_001841160.1 | 32524  | T | C   | 7p12.3   | 7.55  |
| NW_001841160.1 | 32748  | A | C   | 7p12.3   | 7.63  |
| NW_001841160.1 | 33148  | C | T   | 7p11.2   | 7.03  |
| NW_001841160.1 | 33987  | C | A   | 7p12.1   | 6.78  |
| NW_001841160.1 | 34277  | C | G   | 7p12.3   | 8.58  |
| NW_001841160.1 | 42053  | C | G   | 7q11.22  | 6.32  |
| NW_001841160.1 | 42115  | T | C   | 7p12.1   | 6.86  |
| NW_001841160.1 | 42255  | A | T   | 7p12.3   | 6.66  |
| NW_001841160.1 | 42256  | A | C   | 7p12.3   | 7.13  |
| NW_001841160.1 | 46483  | C | T   | 7p12.3   | 6.04  |
| NW_001841160.1 | 48385  | T | A   | 7p12.1   | 6.76  |
| NW_001841160.1 | 48442  | T | G   | 7p12.3   | 6.85  |
| NW_001841160.1 | 48620  | C | G   | 7p12.3   | 6.4   |
| NW_001841160.1 | 58498  | A | T   | 7p12.1   | 7.87  |
| NW_001841160.1 | 64401  | G | A   | 7q11.22  | 6.01  |
| NW_001841160.1 | 75262  | C | T   | 7q11.22  | 6.4   |
| NW_001841160.1 | 104102 | G | C   | 7p12.3   | 8.07  |
| NW_001841160.1 | 108919 | G | A   | 7p12.3   | 6.29  |
| NW_001841160.1 | 128991 | C | T   | 7p12.3   | 6.07  |
| NW_001841160.1 | 142976 | G | A   | 7p12.3   | 6.77  |
| NW_001841160.1 | 151303 | A | C   | 7p12.3   | 7.61  |
| NW_001841160.1 | 156536 | T | C   | 7p12.3   | 7.54  |
| NW_001841160.1 | 160583 | A | G   | 7p12.3   | 6.25  |
| NW_001841051.1 | 95067  | C | G   | 14q11.2  | 6     |
| NW_001841051.1 | 139357 | G | A   | 1q21.1   | 6.58  |
| NW_001839568.1 | 1696   | C | G   | 20q11.21 | 6.72  |
| NW_001839762.1 | 11565  | G | C/T | 10p11.21 | 6.1   |
| NW_001840543.1 | 8088   | T | C   | 12q12    | 6.9   |
| NW_001840887.1 | 2238   | C | T   | 1q21.1   | 8.67  |
| NW_001840306.1 | 15960  | A | G   | 13q34    | 7.45  |
| NW_001840306.1 | 19430  | A | G   | 13q34    | 8.27  |
| NW_001840306.1 | 36632  | G | A   | 13q34    | 7.58  |
| NW_001840306.1 | 39752  | G | A   | 13q34    | 7.01  |
| NW_001840306.1 | 46435  | T | C   | 13q34    | 17    |
| NW_001840306.1 | 71648  | C | T   | 13q34    | 8.21  |
| NW_001840306.1 | 72536  | G | C   | 13q34    | 6.85  |
| NW_001840306.1 | 74517  | A | T   | 13q34    | 10.75 |
| NW_001840306.1 | 77051  | G | A   | 13q34    | 7.27  |
| NW_001840306.1 | 80309  | C | T   | 13q34    | 8.84  |
| NW_001841153.1 | 363    | C | A   | 20p11.21 | 7.16  |
| NW_001841153.1 | 405    | T | G   | 20p11.21 | 6.54  |
| NW_001841153.1 | 421    | G | T   | 20q11.22 | 6.54  |



|                |       |   |     |               |       |
|----------------|-------|---|-----|---------------|-------|
| NW_001841153.1 | 633   | T | A   | 20q11.21      | 6.23  |
| NW_001841153.1 | 672   | C | A   | 20p11.21      | 7.23  |
| NW_001841153.1 | 27193 | T | A   | 20q11.22      | 6.54  |
| NW_001841153.1 | 29123 | A | C   | 20p11.1       | 7.52  |
| NW_001841153.1 | 38076 | G | C   | 20q11.21      | 6.06  |
| NW_001841153.1 | 38314 | C | A   | 20q11.22      | 6.46  |
| NW_001841153.1 | 41577 | C | G   | 20q11.22      | 7.86  |
| NW_001841153.1 | 41594 | A | G   | 20q11.22      | 6.54  |
| NW_001841153.1 | 67963 | C | G/T | 20q11.21      | 6.18  |
| NW_001841965.1 | 2003  | C | T   | 9q21.11       | 6.95  |
| NW_001839963.1 | 940   | G | C   | 1q21.1        | 6.66  |
| NW_001841385.1 | 4011  | C | T   | 2p11.2        | 8.47  |
| NW_001841385.1 | 4150  | A | G   | 2q11.1        | 8.37  |
| NW_001841385.1 | 5666  | G | A   | 2p11.2        | 6.22  |
| NW_001841385.1 | 5691  | C | T   | 2p11.2        | 6.65  |
| NW_001841385.1 | 5714  | T | C   | 2p11.2        | 6.82  |
| NW_001841385.1 | 5727  | T | C   | 2p11.2        | 6.84  |
| NW_001841394.1 | 523   | G | T   | 2p11.2        | 14.08 |
| NW_001841394.1 | 1579  | T | C   | 2q11.1        | 7.41  |
| NW_001841394.1 | 2318  | A | G   | 2q11.1        | 7.18  |
| NW_001841394.1 | 2632  | C | T   | 2p11.2        | 6.01  |
| NW_001841394.1 | 4446  | G | A/T | 2p11.2        | 8.41  |
| NW_001841394.1 | 5245  | A | T   | 2p11.1-2q11.1 | 7.59  |
| NW_001841394.1 | 6230  | C | G   | 2q11.1        | 10.28 |
| NW_001841394.1 | 6865  | C | G   | 2p11.2        | 9.29  |
| NW_001839334.1 | 466   | G | A   | 10p11.21      | 7.94  |
| NW_001839334.1 | 722   | G | C   | 10p11.21      | 7.52  |
| NW_001839334.1 | 820   | C | A   | 10p11.21      | 9.09  |
| NW_001839334.1 | 1006  | G | A   | 10p11.21      | 9.2   |
| NW_001840794.1 | 214   | A | G   | 14q11.2       | 6.54  |
| NW_001840794.1 | 3215  | T | C   | 14q11.2       | 6.1   |
| NW_001840794.1 | 12552 | G | T   | 14q11.2       | 7.41  |
| NW_001840794.1 | 15528 | C | T   | 14q11.2       | 6.68  |
| NW_001839712.1 | 11645 | T | C   | 9q21.11       | 6.77  |
| NW_001839509.1 | 3129  | C | G/T | 2p11.2        | 12.43 |
| NW_001840518.1 | 1194  | C | G/T | 14q11.2       | 6     |
| NW_001840094.1 | 1740  | G | T   | 12p11.1       | 10.62 |
| NW_001839831.1 | 3797  | C | A   | 17q11.2       | 10.99 |
| NW_001839831.1 | 4108  | G | A   | 17q11.2       | 7.48  |
| NW_001840121.1 | 1382  | G | C   | 20p11.21      | 6.23  |
| NW_001840121.1 | 2214  | T | A   | 20p11.21      | 7.68  |
| NW_001840121.1 | 2540  | G | A   | 20q11.22      | 7.11  |
| NW_001840121.1 | 10600 | A | C/G | 20p11.21      | 7.63  |
| NW_001840121.1 | 10950 | A | G   | 20p11.21      | 7.25  |
| NW_001840121.1 | 11301 | G | T   | 20q11.22      | 7.24  |
| NW_001840121.1 | 11378 | G | T   | 20p11.21      | 7.07  |
| NW_001840121.1 | 13489 | T | C   | 20p11.21      | 7.58  |
| NW_001840121.1 | 13951 | G | A/C | 20p11.21      | 6.9   |
| NW_001839996.1 | 542   | C | G   | 9q34.12       | 6.26  |
| NW_001839464.1 | 16839 | T | C   | 7q35          | 6.53  |
| NW_001839464.1 | 18061 | C | T   | 7q35          | 7.5   |
| NW_001839464.1 | 18859 | A | G   | 7q35          | 9.81  |
| NW_001839464.1 | 19096 | T | G   | 7q35          | 7.46  |

|                |        |   |       |                  |       |
|----------------|--------|---|-------|------------------|-------|
| NW_001839464.1 | 19946  | C | T     | 7q34             | 7.65  |
| NW_001839464.1 | 20029  | T | G     | 7q34             | 6.12  |
| NW_001839300.1 | 25118  | A | G     | 14q11.2          | 6.06  |
| NW_001839300.1 | 25153  | C | G/T   | 14q11.2          | 7.05  |
| NW_001840239.1 | 8983   | C | G     | 10p11.21         | 6.63  |
| NW_001841098.1 | 888    | G | T     | 20p11.21         | 9.66  |
| NW_001841098.1 | 1589   | G | T     | 20p11.21         | 7.57  |
| NW_001841098.1 | 1940   | T | G     | 20p11.21         | 6.53  |
| NW_001841098.1 | 1959   | T | A     | 20p11.21         | 6.14  |
| NW_001841098.1 | 2083   | G | A     | 20p11.21         | 6.44  |
| NW_001841098.1 | 2183   | A | T     | 20p11.21         | 6.12  |
| NW_001841098.1 | 2205   | G | A     | 20q11.21         | 7.03  |
| NW_001841098.1 | 2314   | A | G     | 20q11.22         | 6.43  |
| NW_001841098.1 | 2848   | C | T     | 20q11.22         | 8.76  |
| NW_001841098.1 | 2919   | T | G     | 20q11.22         | 6.74  |
| NW_001840030.1 | 2167   | T | C     | 16q12.1          | 6.83  |
| NW_001839364.1 | 15534  | C | T     | 3p11.1           | 6.28  |
| NW_001839364.1 | 37716  | T | C     | 3p11.1           | 7.13  |
| NW_001839364.1 | 38333  | T | C     | 3q11.2           | 13.34 |
| NW_001839364.1 | 42894  | T | C     | 3p11.1           | 6.62  |
| NW_001839364.1 | 48261  | T | C     | 3p11.1           | 8.58  |
| NW_001839364.1 | 49546  | G | T     | 3p11.1           | 9.54  |
| NW_001839364.1 | 50177  | G | T     | 3p11.1           | 8.32  |
| NW_001839364.1 | 59016  | C | A     | 3p11.1           | 8.25  |
| NW_001839364.1 | 60777  | G | A     | 3p11.1           | 7.2   |
| NW_001839364.1 | 74252  | T | C     | 3p11.1           | 7.96  |
| NW_001839364.1 | 81881  | C | T     | 3p11.1           | 8.5   |
| NW_001839364.1 | 81972  | T | C     | 3p11.1           | 7.14  |
| NW_001839364.1 | 85110  | G | T     | 3p11.1           | 7.09  |
| NW_001839364.1 | 257226 | C | T     | 3p11.1           | 8.01  |
| NW_001839364.1 | 266997 | G | C     | 3p11.1           | 8.72  |
| NW_001839364.1 | 268403 | C | T     | 3p12.1           | 6.14  |
| NW_001839364.1 | 270314 | T | C     | 3p12.1           | 6.74  |
| NW_001839364.1 | 274040 | G | A     | 3p11.1           | 9.52  |
| NW_001839364.1 | 274402 | G | T     | 3p11.1           | 8.83  |
| NW_001839364.1 | 275692 | G | T     | 3p11.1           | 9     |
| NW_001839364.1 | 279018 | A | G     | 3p12.1           | 6.27  |
| NW_001839364.1 | 283479 | C | T     | 3p11.1           | 10.87 |
| NW_001839364.1 | 283906 | A | G     | 3q11.2           | 8.95  |
| NW_001839364.1 | 296839 | G | A     | 3p11.1           | 8.42  |
| NW_001839364.1 | 298597 | G | A     | 3p11.1           | 6.97  |
| NW_001841156.1 | 4431   | G | T     | 20p11.1          | 7.67  |
| NW_001841156.1 | 11303  | G | C     | 20q11.22         | 6.79  |
| NW_001841156.1 | 11657  | G | A     | 20p11.21         | 6.22  |
| NW_001841156.1 | 22255  | A | G     | 20q11.23         | 6.82  |
| NW_001840086.1 | 1534   | T | A     | 18p11.21         | 6.67  |
| NW_001840086.1 | 1668   | C | T     | 18p11.21         | 6.27  |
| NW_001840086.1 | 2601   | T | A/C/G | 18p11.21         | 9.03  |
| NW_001840086.1 | 11757  | G | C     | 18p11.21         | 7.13  |
| NW_001840086.1 | 12295  | T | C     | 18q11.1          | 8.2   |
| NW_001840086.1 | 12356  | T | G     | 18q11.1          | 6.15  |
| NW_001840086.1 | 12462  | C | T     | 18p11.21-18q11.1 | 8.01  |
| NW_001840086.1 | 13224  | C | G     | 18p11.21         | 13.88 |

|                |       |   |       |               |       |
|----------------|-------|---|-------|---------------|-------|
| NW_001840086.1 | 13323 | G | T     | 18p11.21      | 8.1   |
| NW_001840086.1 | 14608 | T | C     | 18p11.21      | 12.29 |
| NW_001840086.1 | 14842 | A | G     | 18q11.1       | 11.91 |
| NW_001840086.1 | 14897 | A | G     | 18q11.1       | 9.65  |
| NW_001840086.1 | 17427 | A | C     | 18q11.2       | 6.59  |
| NW_001840086.1 | 18201 | G | T     | 18p11.21      | 9.62  |
| NW_001839779.1 | 13497 | A | C     | 5p12          | 6.93  |
| NW_001840319.1 | 10547 | C | G     | 9q21.12       | 7.82  |
| NW_001840304.1 | 910   | C | G/T   | 4q12          | 6.43  |
| NW_001840034.1 | 10310 | A | G     | 20p11.1       | 8.82  |
| NW_001841085.1 | 1138  | G | A     | 2q11.2        | 6.22  |
| NW_001841085.1 | 5144  | T | C     | 2q11.2        | 9.91  |
| NW_001841085.1 | 6331  | G | A     | 2p11.1-2q11.1 | 6.32  |
| NW_001839938.1 | 476   | G | T     | 20p11.21      | 6.32  |
| NW_001839850.1 | 3270  | C | T     | 1q21.1        | 8.9   |
| NW_001840338.1 | 118   | G | A/C   | 20p11.21      | 6.08  |
| NW_001840338.1 | 364   | A | T     | 20p11.21      | 6.56  |
| NW_001840338.1 | 435   | G | T     | 20p11.21      | 7.79  |
| NW_001840338.1 | 481   | T | A     | 20p11.21      | 8.57  |
| NW_001840338.1 | 503   | G | T     | 20p11.21      | 7.36  |
| NW_001839440.1 | 3898  | C | T     | 2p11.1-2q11.1 | 6.35  |
| NW_001839440.1 | 3907  | C | G     | 2q11.1        | 6.17  |
| NW_001839440.1 | 4422  | A | G     | 2p11.2        | 7.77  |
| NW_001839440.1 | 4483  | T | A     | 2q11.1        | 6.29  |
| NW_001839440.1 | 4586  | A | T     | 2q11.2        | 7.04  |
| NW_001841237.1 | 4267  | G | A     | 17p11.2       | 6.93  |
| NW_001839865.1 | 1828  | G | T     | 5p12          | 7.43  |
| NW_001839865.1 | 3722  | T | C     | 5p12          | 6.44  |
| NW_001839865.1 | 3733  | C | A     | 5p12          | 6.5   |
| NW_001840761.1 | 433   | G | T     | 1q21.1        | 8.97  |
| NW_001840943.1 | 338   | G | A     | 20p11.21      | 7.05  |
| NW_001840943.1 | 396   | A | T     | 20p11.21      | 6.99  |
| NW_001840943.1 | 1030  | A | G     | 20p11.21      | 7.39  |
| NW_001840943.1 | 1033  | G | T     | 20p11.21      | 7.63  |
| NW_001840943.1 | 1037  | T | G     | 20p11.21      | 7.76  |
| NW_001840943.1 | 1175  | A | C     | 20p11.21      | 6.64  |
| NW_001840943.1 | 1177  | T | C     | 20p11.21      | 6.11  |
| NW_001840943.1 | 2211  | G | A     | 20q11.21      | 6.13  |
| NW_001840943.1 | 3421  | G | T     | 20p11.21      | 6.94  |
| NW_001840943.1 | 4522  | A | G     | 20p11.21      | 6.93  |
| NW_001841755.1 | 438   | T | A     | 2q11.1        | 10.74 |
| NW_001841755.1 | 2775  | G | T     | 2p11.2        | 8.08  |
| NW_001841755.1 | 3373  | C | T     | 2q11.2        | 9.12  |
| NW_001841755.1 | 3613  | T | A     | 2q11.1        | 9.25  |
| NW_001841755.1 | 4051  | G | A     | 2q11.2        | 7.56  |
| NW_001841755.1 | 6243  | G | A     | 2q11.2        | 6.28  |
| NW_001841755.1 | 6368  | T | C     | 2q11.1        | 9.14  |
| NW_001841755.1 | 6516  | C | T     | 2q11.2        | 6.5   |
| NW_001841755.1 | 6532  | C | A     | 2q11.2        | 6.22  |
| NW_001841755.1 | 7187  | C | T     | 2p11.2        | 9.15  |
| NW_001839589.1 | 35072 | A | C/G/T | 14q11.2       | 6.24  |
| NW_001839494.1 | 240   | C | T     | 22q11.1       | 6.06  |
| NW_001839418.1 | 10307 | T | A     | 12q12         | 13.76 |

|                |       |   |     |                  |      |
|----------------|-------|---|-----|------------------|------|
| NW_001839418.1 | 10845 | A | G   | 12p11.21-12p11.1 | 6.08 |
| NW_001839418.1 | 10847 | A | G   | 12q12            | 7.95 |
| NW_001839418.1 | 10978 | C | A   | 12q12            | 6.13 |
| NW_001839418.1 | 10985 | G | C   | 12q12            | 6.15 |
| NW_001839418.1 | 11046 | A | T   | 12q12            | 6.46 |
| NW_001839418.1 | 11066 | A | T   | 12q12            | 7.84 |
| NW_001839418.1 | 11456 | T | A   | 12q12            | 6.25 |
| NW_001841141.1 | 10436 | G | A   | 20p11.21         | 7.65 |
| NW_001841141.1 | 10630 | T | A   | 20p11.21         | 7.38 |
| NW_001841141.1 | 11631 | G | C   | 20p11.21         | 6.89 |
| NW_001841141.1 | 11709 | A | G/T | 20p11.21         | 7.48 |
| NW_001841141.1 | 12491 | G | C/T | 20q11.21         | 6.57 |
| NW_001841141.1 | 12735 | G | A   | 20q11.22         | 7.36 |
| NW_001841141.1 | 20122 | T | C   | 20p11.21         | 8.07 |
| NW_001841141.1 | 20365 | A | G   | 20q11.21         | 6.81 |
| NW_001841141.1 | 20416 | T | G   | 20p11.21         | 7.94 |
| NW_001841141.1 | 20821 | T | C   | 20q11.21         | 7.66 |
| NW_001841141.1 | 21549 | C | T   | 20q11.21         | 6.21 |
| NW_001841141.1 | 21576 | G | A   | 20p11.21         | 7.64 |
| NW_001841141.1 | 21636 | C | G   | 20q11.21         | 7.86 |
| NW_001839457.1 | 2355  | T | G   | 9p13.1           | 6.32 |
| NW_001840555.1 | 552   | C | A   | 5q11.1           | 7.59 |
| NW_001840555.1 | 1721  | C | A/T | 5q11.1           | 8.3  |
| NW_001839806.1 | 2368  | A | T   | 20q11.21         | 9.55 |
| NW_001839806.1 | 11200 | C | A   | 20q11.21         | 6.19 |
| NW_001839806.1 | 12738 | A | G   | 20q11.22         | 6.37 |
| NW_001839806.1 | 12796 | G | T   | 20q11.21         | 7.91 |
| NW_001839806.1 | 12936 | A | G   | 20q11.22         | 8.5  |
| NW_001839806.1 | 12938 | C | A   | 20q11.21         | 8.06 |
| NW_001840082.1 | 2674  | C | T   | 20p11.1          | 6.7  |
| NW_001840082.1 | 2774  | A | G   | 20q11.21         | 6.95 |
| NW_001840082.1 | 2775  | A | C   | 20q11.21         | 7.88 |
| NW_001841108.1 | 2669  | C | T   | 3p11.1           | 6.13 |
| NW_001841108.1 | 4351  | G | A   | 3p11.1           | 6.81 |
| NW_001839350.1 | 9692  | G | T   | 19p12            | 6.07 |
| NW_001839350.1 | 10200 | T | C   | 19p12            | 6.42 |
| NW_001839350.1 | 10326 | G | C   | 19p12            | 7.4  |
| NW_001840540.1 | 1288  | A | G   | 10q11.21         | 6.58 |
| NW_001841154.1 | 4375  | A | G   | 9q21.12          | 6.19 |
| NW_001841154.1 | 17243 | C | G   | 9p13.2           | 6.58 |
| NW_001841154.1 | 18517 | A | G   | 9q21.12          | 6.25 |
| NW_001841154.1 | 20414 | T | C   | 9q21.11          | 6.34 |
| NW_001839736.1 | 1582  | G | A   | 12p11.21         | 6.81 |
| NW_001839736.1 | 12922 | T | A/C | 12q12            | 7.37 |
| NW_001840462.1 | 30232 | T | G   | 19p12            | 6.75 |
| NW_001840640.1 | 1617  | T | G   | 20p11.21         | 7.72 |
| NW_001840640.1 | 2675  | C | T   | 20p11.21         | 6.09 |
| NW_001840640.1 | 4388  | A | C/T | 20p11.21         | 6.55 |
| NW_001840640.1 | 4593  | T | A   | 20p11.21         | 7.29 |
| NW_001841142.1 | 41572 | G | A   | 17q11.2          | 6.12 |
| NW_001841142.1 | 70302 | T | A   | 17p11.2          | 7.29 |
| NW_001841142.1 | 76675 | G | A   | 17p11.2          | 7.49 |
| NW_001841142.1 | 79673 | G | A   | 17q11.2          | 7.7  |

|                |        |   |     |          |       |
|----------------|--------|---|-----|----------|-------|
| NW_001841142.1 | 79775  | C | G   | 17q11.2  | 7.03  |
| NW_001841142.1 | 85152  | A | C   | 17p11.2  | 6.71  |
| NW_001841142.1 | 85456  | C | T   | 17p11.2  | 8.13  |
| NW_001841142.1 | 86067  | T | C   | 17p11.2  | 6.55  |
| NW_001841142.1 | 89707  | T | A   | 17q11.2  | 6.23  |
| NW_001841142.1 | 108027 | G | T   | 17q11.2  | 6.33  |
| NW_001841142.1 | 108656 | C | T   | 17q11.2  | 6.21  |
| NW_001841142.1 | 120972 | G | T   | 17p11.2  | 6.68  |
| NW_001841142.1 | 123783 | A | C   | 17q11.2  | 6.5   |
| NW_001841142.1 | 131472 | T | C   | 17q11.2  | 7.13  |
| NW_001841142.1 | 132933 | C | T   | 17q11.2  | 6.41  |
| NW_001841142.1 | 134097 | T | C   | 17p11.2  | 6.18  |
| NW_001841142.1 | 134145 | G | A   | 17p11.2  | 6.15  |
| NW_001841142.1 | 137979 | A | G   | 17p11.2  | 6.26  |
| NW_001841142.1 | 226453 | G | C   | 17p11.2  | 7.28  |
| NW_001841142.1 | 227109 | G | T   | 17q11.2  | 6.2   |
| NW_001841142.1 | 243193 | T | G   | 17p11.2  | 6.1   |
| NW_001841142.1 | 244044 | G | A   | 17p11.2  | 6.98  |
| NW_001841142.1 | 244604 | G | A   | 17p11.2  | 7.31  |
| NW_001841142.1 | 245034 | C | T   | 17p11.2  | 6.32  |
| NW_001841142.1 | 245330 | G | A   | 17q11.2  | 6.5   |
| NW_001841050.1 | 1985   | A | G   | 19p12    | 6.74  |
| NW_001839949.1 | 8891   | G | A/T | 7q11.21  | 6.7   |
| NW_001839949.1 | 17056  | T | C   | 7p12.1   | 6.88  |
| NW_001839949.1 | 17326  | T | C   | 7p12.1   | 7.28  |
| NW_001841120.1 | 420    | A | T   | 20p11.21 | 6     |
| NW_001839668.1 | 29873  | T | G   | 7p12.3   | 7.67  |
| NW_001839668.1 | 47872  | T | A   | 7q11.22  | 6.65  |
| NW_001841032.1 | 787    | C | G/T | 2q11.2   | 6.45  |
| NW_001841032.1 | 1549   | T | C   | 2p12     | 6     |
| NW_001841032.1 | 1988   | A | T   | 2p11.2   | 11.17 |
| NW_001841032.1 | 2081   | A | T   | 2p11.2   | 12.94 |
| NW_001840675.1 | 2533   | T | C   | 5q11.2   | 9.14  |
| NW_001842432.1 | 168    | G | A   | 20p11.21 | 6.92  |
| NW_001842432.1 | 14209  | G | T   | 20p11.21 | 6.47  |
| NW_001842432.1 | 25175  | T | C   | 20p11.21 | 6.79  |
| NW_001842432.1 | 33509  | T | C   | 20p11.21 | 7.89  |
| NW_001842432.1 | 45621  | A | G   | 20q11.21 | 7.29  |
| NW_001842432.1 | 57735  | G | C   | 20p11.21 | 6.23  |
| NW_001842432.1 | 60676  | C | T   | 20p11.21 | 7.62  |
| NW_001842432.1 | 78782  | G | A   | 20p11.21 | 6.49  |
| NW_001842432.1 | 132485 | T | A   | 20p11.21 | 6.79  |
| NW_001842432.1 | 430890 | G | A   | 20q11.21 | 7.07  |
| NW_001842432.1 | 448902 | A | G   | 20q11.21 | 7.4   |
| NW_001842432.1 | 452054 | T | C   | 20q11.21 | 7.96  |
| NW_001842432.1 | 452623 | A | G   | 20p11.21 | 7.45  |
| NW_001842432.1 | 452844 | C | G   | 20q11.21 | 6.16  |
| NW_001842432.1 | 453349 | C | T   | 20q11.21 | 6.2   |
| NW_001842432.1 | 453979 | A | C   | 20q11.21 | 10.03 |
| NW_001842432.1 | 454256 | T | G   | 20q11.21 | 9.78  |
| NW_001842432.1 | 454475 | A | G   | 20q11.21 | 7.13  |
| NW_001842432.1 | 455837 | C | T   | 20q11.21 | 9.04  |
| NW_001842432.1 | 456476 | G | T   | 20q11.21 | 7.68  |

|                |        |   |     |          |       |
|----------------|--------|---|-----|----------|-------|
| NW_001842432.1 | 458726 | C | A   | 20q11.21 | 9.45  |
| NW_001842432.1 | 458876 | G | A   | 20q11.21 | 7.83  |
| NW_001842432.1 | 459447 | G | C   | 20q11.21 | 12.46 |
| NW_001842432.1 | 460053 | G | A   | 20q11.21 | 8.39  |
| NW_001842432.1 | 460207 | A | G   | 20q11.22 | 11.18 |
| NW_001842432.1 | 460310 | G | T   | 20p11.21 | 9.14  |
| NW_001842432.1 | 460891 | C | G   | 20p11.21 | 9.78  |
| NW_001842432.1 | 460906 | C | T   | 20p11.21 | 8.83  |
| NW_001842432.1 | 460944 | G | A   | 20q11.21 | 6.84  |
| NW_001842432.1 | 460968 | C | G   | 20q11.21 | 10.1  |
| NW_001842432.1 | 462514 | T | C   | 20q11.21 | 10.01 |
| NW_001842432.1 | 462816 | C | T   | 20q11.21 | 6.76  |
| NW_001842432.1 | 464138 | T | C   | 20q11.21 | 8.65  |
| NW_001842432.1 | 464783 | A | G   | 20q11.21 | 11.05 |
| NW_001842432.1 | 465250 | G | C   | 20q11.21 | 8.55  |
| NW_001842432.1 | 465367 | C | T   | 20q11.21 | 9.1   |
| NW_001842432.1 | 466607 | G | C/T | 20q11.22 | 11.88 |
| NW_001842432.1 | 467065 | T | A   | 20q11.21 | 9.81  |
| NW_001842432.1 | 467936 | G | A   | 20p11.21 | 8.6   |
| NW_001842432.1 | 469987 | C | T   | 20q11.21 | 7.19  |
| NW_001842432.1 | 473483 | A | C   | 20q11.21 | 9.83  |
| NW_001842432.1 | 476396 | A | C/T | 20q11.21 | 7.96  |
| NW_001842432.1 | 476650 | A | G   | 20q11.21 | 6.13  |
| NW_001842432.1 | 478144 | A | G   | 20q11.22 | 12.55 |
| NW_001842432.1 | 478469 | T | G   | 20q11.21 | 8.67  |
| NW_001842432.1 | 479054 | A | C   | 20q11.21 | 10.4  |
| NW_001842432.1 | 479562 | A | T   | 20q11.21 | 9.78  |
| NW_001842432.1 | 480821 | C | G/T | 20q11.21 | 7.93  |
| NW_001842432.1 | 483225 | T | C   | 20q11.21 | 6.64  |
| NW_001842432.1 | 487283 | A | G   | 20q11.21 | 9.76  |
| NW_001842432.1 | 487570 | T | G   | 20q11.22 | 12.29 |
| NW_001842432.1 | 487764 | T | G   | 20q11.21 | 6.93  |
| NW_001842432.1 | 489020 | A | C   | 20q11.21 | 8.06  |
| NW_001842432.1 | 489240 | A | G   | 20q11.21 | 10.07 |
| NW_001842432.1 | 489490 | G | A   | 20q11.21 | 8.2   |
| NW_001842432.1 | 492755 | T | C   | 20q11.21 | 10.02 |
| NW_001842432.1 | 493046 | A | T   | 20q11.21 | 8.46  |
| NW_001842432.1 | 494931 | C | G   | 20q11.21 | 10    |
| NW_001842432.1 | 496702 | A | G   | 20q11.21 | 6.63  |
| NW_001842432.1 | 497042 | C | T   | 20q11.21 | 6.45  |
| NW_001842432.1 | 497075 | G | T   | 20q11.21 | 9.15  |
| NW_001842432.1 | 497302 | A | T   | 20q11.21 | 9.46  |
| NW_001842432.1 | 497723 | G | A   | 20q11.21 | 9.43  |
| NW_001842432.1 | 497930 | A | G   | 20q11.22 | 10.27 |
| NW_001842432.1 | 498080 | A | T   | 20q11.21 | 9.86  |
| NW_001842432.1 | 498447 | A | T   | 20q11.21 | 9.36  |
| NW_001842432.1 | 498802 | C | T   | 20q11.21 | 9.4   |
| NW_001842432.1 | 499432 | C | G   | 20q11.22 | 11.45 |
| NW_001842432.1 | 499549 | T | C   | 20q11.21 | 9.76  |
| NW_001842432.1 | 499883 | A | G   | 20p11.21 | 8.68  |
| NW_001842432.1 | 501133 | C | T   | 20q11.21 | 8.13  |
| NW_001842432.1 | 501243 | C | G   | 20q11.21 | 6.64  |
| NW_001842432.1 | 501351 | T | C   | 20q11.22 | 11.13 |

|                |        |   |     |          |       |
|----------------|--------|---|-----|----------|-------|
| NW_001842432.1 | 501360 | A | T   | 20q11.21 | 10.01 |
| NW_001842432.1 | 502685 | C | T   | 20q11.21 | 7.49  |
| NW_001842432.1 | 507440 | T | G   | 20q11.21 | 8.09  |
| NW_001842432.1 | 507441 | T | A   | 20q11.21 | 8.49  |
| NW_001842432.1 | 508197 | T | C   | 20q11.21 | 11.62 |
| NW_001842432.1 | 508626 | G | C   | 20q11.21 | 6.65  |
| NW_001842432.1 | 508912 | C | A   | 20p11.21 | 8.98  |
| NW_001842432.1 | 509387 | T | C   | 20q11.21 | 8.55  |
| NW_001842432.1 | 510226 | A | T   | 20q11.22 | 12.55 |
| NW_001842432.1 | 510986 | A | G   | 20q11.21 | 8.58  |
| NW_001842432.1 | 511253 | G | A   | 20q11.21 | 6.05  |
| NW_001842432.1 | 513038 | G | T   | 20p11.21 | 9.62  |
| NW_001842432.1 | 513042 | C | G   | 20p11.21 | 9.61  |
| NW_001842432.1 | 513907 | A | T   | 20q11.21 | 9.81  |
| NW_001842432.1 | 513981 | C | T   | 20q11.21 | 13.12 |
| NW_001842432.1 | 514191 | C | A/G | 20q11.21 | 7.51  |
| NW_001842432.1 | 514450 | T | A/C | 20p11.21 | 6.97  |
| NW_001842432.1 | 515418 | T | C   | 20q11.21 | 6.42  |
| NW_001842432.1 | 515638 | C | T   | 20q11.21 | 9.59  |
| NW_001842432.1 | 515876 | T | G   | 20q11.21 | 7.6   |
| NW_001842432.1 | 516055 | T | A   | 20q11.22 | 9.13  |
| NW_001842432.1 | 516165 | A | G   | 20q11.21 | 6.13  |
| NW_001842432.1 | 517336 | A | G   | 20p11.23 | 6.33  |
| NW_001842432.1 | 518155 | C | T   | 20p11.21 | 8.37  |
| NW_001842432.1 | 518158 | G | A   | 20q11.21 | 7.17  |
| NW_001842432.1 | 518546 | G | A   | 20q11.21 | 9.23  |
| NW_001842432.1 | 518605 | A | G   | 20q11.21 | 6.38  |
| NW_001842432.1 | 518769 | G | T   | 20q11.22 | 7.18  |
| NW_001842432.1 | 519182 | C | T   | 20p11.1  | 7.04  |
| NW_001842432.1 | 520625 | C | T   | 20q11.21 | 6.42  |
| NW_001842432.1 | 522912 | C | G   | 20q11.21 | 6.36  |
| NW_001842432.1 | 523312 | G | T   | 20q11.21 | 8.38  |
| NW_001842432.1 | 524325 | C | T   | 20q11.21 | 9.31  |
| NW_001842432.1 | 525645 | C | T   | 20q11.22 | 6.02  |
| NW_001842432.1 | 525882 | T | G   | 20p11.21 | 8.68  |
| NW_001842432.1 | 529324 | G | A/C | 20q11.21 | 6.75  |
| NW_001842432.1 | 530582 | A | G   | 20q11.21 | 6.8   |
| AEKP01009090.1 | 25046  | G | A   | 9q34.2   | 6.18  |
| AEKP01009295.1 | 14217  | C | T   | 9q34.3   | 9.36  |
| AEKP01009296.1 | 9441   | T | C   | 9q34.3   | 9.61  |
| AEKP01012023.1 | 3105   | A | G   | 10p11.21 | 6.91  |
| AEKP01020329.1 | 4010   | T | C   | 18q21.2  | 10.5  |
| AEKP01020477.1 | 5774   | G | T   | 18q21.2  | 6.23  |
| AEKP01020477.1 | 6057   | C | T   | 18q21.2  | 6.08  |
| AEKP01021472.1 | 8467   | C | T   | 18q22.2  | 6.6   |
| AEKP01024816.1 | 17752  | G | T   | 3p14.1   | 9.97  |
| AEKP01024816.1 | 18215  | T | C   | 3p14.1   | 7.12  |
| AEKP01024816.1 | 18887  | G | A   | 3p14.1   | 8.08  |
| AEKP01024816.1 | 19386  | G | T   | 3p14.1   | 8.74  |
| AEKP01024816.1 | 20501  | G | A   | 3p14.1   | 14.57 |
| AEKP01024816.1 | 20889  | C | T   | 3p14.1   | 8.34  |
| AEKP01024816.1 | 21886  | A | T   | 3p14.1   | 11.36 |
| AEKP01026639.1 | 1365   | T | C   | 14q32.33 | 6.97  |

|                |       |   |   |                   |       |
|----------------|-------|---|---|-------------------|-------|
| AEKP01028421.1 | 29690 | C | T | 15q22.31          | 7.81  |
| AEKP01028972.1 | 14346 | A | T | 3q21.2            | 6.67  |
| AEKP01032148.1 | 21479 | A | G | 12q24.11          | 14.59 |
| AEKP01032148.1 | 25418 | A | C | 12q24.11          | 15.94 |
| AEKP01044255.1 | 4768  | C | T | 2q37.1            | 13.59 |
| AEKP01044945.1 | 9205  | G | A | 3q29              | 7.07  |
| AEKP01046855.1 | 367   | G | C | 13q12.3           | 7.34  |
| AEKP01046855.1 | 534   | G | T | 13q12.3           | 11.25 |
| AEKP01047722.1 | 20929 | T | G | 13q14.11          | 7.03  |
| AEKP01050701.1 | 1376  | C | T | 12p13.2           | 8.69  |
| AEKP01050701.1 | 2710  | A | T | 12p13.2           | 7.3   |
| AEKP01050790.1 | 4724  | T | C | 6q27              | 7     |
| AEKP01050790.1 | 4986  | G | T | 6q27              | 6.2   |
| AEKP01050790.1 | 5150  | G | A | 6q27              | 10.03 |
| AEKP01050831.1 | 4761  | G | T | 6q27              | 18.3  |
| AEKP01050831.1 | 5249  | G | A | 6q27              | 6.65  |
| AEKP01056923.1 | 33881 | G | A | 3q26.2            | 7.04  |
| AEKP01056923.1 | 33928 | A | G | 3q26.1            | 6.07  |
| AEKP01061772.1 | 7270  | T | C | 8p21.3            | 6.93  |
| AEKP01061772.1 | 7531  | A | G | 8p21.3            | 7.95  |
| AEKP01061772.1 | 8851  | A | C | 8p21.3            | 9.14  |
| AEKP01069476.1 | 10644 | T | C | 20q11.21-20q11.22 | 9.94  |
| AEKP01069476.1 | 12394 | T | C | 20q11.21-20q11.22 | 14.62 |
| AEKP01069477.1 | 1094  | C | A | 20q11.22          | 9.23  |
| AEKP01069477.1 | 6048  | C | T | 20q11.21          | 8.64  |
| AEKP01075945.1 | 44821 | G | T | 20p11.21          | 6.09  |
| AEKP01075945.1 | 45594 | G | C | 20p11.21          | 6.31  |
| AEKP01077264.1 | 1258  | T | C | 9q21.13           | 9.52  |
| AEKP01077264.1 | 1546  | C | T | 9q21.13           | 13.81 |
| AEKP01077264.1 | 1808  | A | G | 9q21.13           | 14.82 |
| AEKP01079279.1 | 3341  | A | G | 7q32.1            | 7.48  |
| AEKP01079702.1 | 57969 | A | G | 7q33              | 17.69 |
| AEKP01080035.1 | 17282 | C | G | 7q34              | 6.82  |
| AEKP01080035.1 | 18870 | G | A | 7q34              | 8.26  |
| AEKP01080035.1 | 18983 | A | G | 7q34              | 10.53 |
| AEKP01080035.1 | 19351 | A | T | 7q34              | 6.44  |
| AEKP01080035.1 | 20736 | T | C | 7q34              | 7.05  |
| AEKP01080035.1 | 22883 | G | C | 7q34              | 9.31  |
| AEKP01080035.1 | 23125 | G | C | 7q34              | 8.43  |
| AEKP01080035.1 | 23421 | C | T | 7q34              | 6.2   |
| AEKP01080279.1 | 17211 | T | C | 7q35              | 7.28  |
| AEKP01091774.1 | 18942 | T | C | 1q24.1            | 6.62  |
| AEKP01093265.1 | 7516  | A | G | 10q21.1           | 6.78  |
| AEKP01093265.1 | 8896  | G | A | 10q21.1           | 9.48  |
| AEKP01093265.1 | 8984  | A | T | 10q21.1           | 8.2   |
| AEKP01093265.1 | 10307 | G | A | 10q21.1           | 9.18  |
| AEKP01094557.1 | 6806  | C | G | 17q22             | 10.68 |
| AEKP01094557.1 | 7434  | C | A | 17q22             | 10.89 |
| AEKP01094557.1 | 8171  | G | A | 17q22             | 12.75 |
| AEKP01094557.1 | 8244  | C | T | 17q22             | 12.14 |
| AEKP01094557.1 | 10470 | G | A | 17q22             | 6.22  |
| AEKP01094557.1 | 11007 | G | T | 17q22             | 10.17 |
| AEKP01095456.1 | 4399  | T | C | 7q21.11           | 11.89 |



|                |       |   |   |          |       |
|----------------|-------|---|---|----------|-------|
| AEKP01095456.1 | 4445  | A | G | 7q21.11  | 12.41 |
| AEKP01095456.1 | 4524  | T | C | 7q21.11  | 14.23 |
| AEKP01095456.1 | 5315  | T | A | 7q21.11  | 8.04  |
| AEKP01110547.1 | 664   | C | T | 21q22.3  | 9.39  |
| AEKP01110973.1 | 6910  | A | G | 2q34     | 9.42  |
| AEKP01114218.1 | 8196  | C | A | 1q32.1   | 7.29  |
| AEKP01114218.1 | 9711  | G | C | 1q32.1   | 6.4   |
| AEKP01114218.1 | 10540 | T | G | 1q32.1   | 19.48 |
| AEKP01114218.1 | 13376 | T | A | 1q32.1   | 6.21  |
| AEKP01117124.1 | 13747 | T | C | 6q16.1   | 14.43 |
| AEKP01117124.1 | 22345 | T | A | 6q16.1   | 12.68 |
| AEKP01117124.1 | 45920 | T | C | 6q16.1   | 9.27  |
| AEKP01122432.1 | 14069 | A | G | 10q24.1  | 6.95  |
| AEKP01122432.1 | 15136 | A | G | 10q24.1  | 6.78  |
| AEKP01126737.1 | 864   | A | C | 12p13.31 | 6.12  |
| AEKP01128935.1 | 4035  | G | T | 14q12    | 7.11  |
| AEKP01132292.1 | 8202  | G | T | 22q13.33 | 6.21  |
| AEKP01132292.1 | 9333  | T | C | 22q13.32 | 8.21  |
| AEKP01139726.1 | 31390 | G | A | 1q42.2   | 6.94  |
| AEKP01147502.1 | 3360  | T | C | 10q26.3  | 6.1   |
| AEKP01147502.1 | 9054  | T | C | 10q26.3  | 9.05  |
| AEKP01147502.1 | 13532 | G | C | 10q26.3  | 7.07  |
| AEKP01147502.1 | 13721 | A | G | 10q26.3  | 6.94  |
| AEKP01149793.1 | 13286 | C | T | 13q34    | 7.48  |
| AEKP01149793.1 | 16425 | A | G | 13q34    | 11.42 |
| AEKP01149802.1 | 7976  | G | C | 13q34    | 7.29  |
| AEKP01150066.1 | 1720  | C | T | 13q34    | 6.24  |
| AEKP01151782.1 | 27042 | C | A | 4p16.1   | 9.08  |
| AEKP01151782.1 | 27172 | C | T | 4p16.1   | 7.58  |
| AEKP01151782.1 | 27255 | G | A | 4p15.33  | 8.03  |
| AEKP01151782.1 | 28138 | C | T | 4p16.1   | 9.84  |
| AEKP01151782.1 | 28349 | T | C | 4p16.1   | 7.58  |
| AEKP01151782.1 | 28723 | G | A | 4p16.1   | 7.27  |
| AEKP01153555.1 | 1430  | T | A | 7p22.3   | 7.84  |
| AEKP01153555.1 | 1514  | C | G | 7p22.3   | 6.64  |
| AEKP01153555.1 | 2559  | A | C | 7p22.3   | 6.25  |
| AEKP01153556.1 | 2061  | T | C | 7p22.3   | 8.06  |
| AEKP01153556.1 | 4438  | T | C | 7p22.3   | 6.16  |
| AEKP01153556.1 | 4475  | C | G | 7p22.3   | 7.06  |
| AEKP01158634.1 | 443   | C | A | 12q12    | 12.46 |
| AEKP01158635.1 | 722   | C | T | 12q12    | 6.38  |
| AEKP01158635.1 | 738   | C | G | 12q12    | 6.58  |
| AEKP01158637.1 | 6240  | G | A | 12q12    | 6.55  |
| AEKP01158637.1 | 6512  | A | C | 12q12    | 12.15 |
| AEKP01158637.1 | 6854  | C | T | 12q12    | 13.85 |
| AEKP01158637.1 | 6918  | C | T | 12q12    | 12.81 |
| AEKP01158637.1 | 6992  | A | T | 12q12    | 13.38 |
| AEKP01158637.1 | 6999  | C | T | 12q12    | 13.42 |
| AEKP01158637.1 | 7005  | T | C | 12q11    | 8.19  |
| AEKP01158637.1 | 7400  | G | A | 12q12    | 9.94  |
| AEKP01158637.1 | 7435  | T | C | 12q11    | 9.33  |
| AEKP01158637.1 | 7996  | G | A | 12q12    | 11.28 |
| AEKP01158637.1 | 8144  | C | T | 12q12    | 11.73 |

|                |        |   |     |                  |       |
|----------------|--------|---|-----|------------------|-------|
| AEKP01158637.1 | 8272   | T | C   | 12q11            | 10.06 |
| AEKP01158637.1 | 9055   | C | A   | 12q12            | 12.35 |
| AEKP01158637.1 | 9378   | C | T   | 12q11            | 9.31  |
| AEKP01158637.1 | 9703   | G | T   | 12q12            | 12.32 |
| AEKP01158637.1 | 9948   | G | C   | 12q12            | 13.63 |
| AEKP01158637.1 | 10127  | G | T   | 12p11.21-12p11.1 | 6     |
| AEKP01158637.1 | 10219  | T | C   | 12q11            | 7.36  |
| AEKP01158637.1 | 10441  | C | T   | 12q12            | 10.27 |
| AEKP01158637.1 | 10453  | G | A   | 12q12            | 15.14 |
| AEKP01158637.1 | 10538  | G | A   | 12q12            | 11.6  |
| AEKP01158637.1 | 10545  | T | C   | 12q12            | 13.88 |
| AEKP01158637.1 | 10712  | C | T   | 12q11            | 8.84  |
| AEKP01158637.1 | 11021  | C | T   | 12q12            | 11.83 |
| AEKP01158637.1 | 11057  | A | C   | 12q12            | 14    |
| AEKP01158637.1 | 11289  | G | A   | 12q11            | 9.29  |
| AEKP01158637.1 | 11536  | A | C/T | 12q12            | 10.72 |
| AEKP01158637.1 | 12047  | C | T   | 12q12            | 9.44  |
| AEKP01163119.1 | 2361   | T | C   | 1p36.22          | 7.16  |
| AEKP01166084.1 | 5446   | A | G   | 9q22.1           | 11.71 |
| AEKP01166084.1 | 5670   | A | G   | 9q22.1           | 13.3  |
| AEKP01166084.1 | 7949   | A | G   | 9q22.1           | 8.19  |
| AEKP01166084.1 | 15617  | C | T   | 9q22.1           | 7.1   |
| AEKP01166223.1 | 2620   | G | A   | 9q22.2           | 8.46  |
| AEKP01166223.1 | 2703   | G | A   | 9q22.2           | 12.57 |
| AEKP01166223.1 | 3655   | G | A   | 9q22.2           | 15.6  |
| AEKP01166227.1 | 50722  | T | C   | 9q22.2           | 9.25  |
| AEKP01166227.1 | 50745  | A | T   | 9q22.2           | 6.36  |
| AEKP01166227.1 | 51379  | C | T   | 9q22.2           | 9.06  |
| AEKP01166227.1 | 53225  | C | A   | 9q22.2           | 7.43  |
| AEKP01166227.1 | 56023  | C | A   | 9q22.31          | 8.19  |
| AEKP01166227.1 | 58939  | C | A   | 9q22.2           | 8.49  |
| AEKP01166227.1 | 63702  | T | C   | 9q22.1           | 7.26  |
| AEKP01166227.1 | 65652  | C | T   | 9q22.2           | 9.97  |
| AEKP01166227.1 | 83766  | T | A   | 9q22.2           | 6.31  |
| AEKP01166227.1 | 86938  | G | A   | 9q22.2           | 6.1   |
| AEKP01166227.1 | 89950  | C | T   | 9q22.2           | 6.09  |
| AEKP01166227.1 | 101266 | T | A   | 9q22.2           | 6.76  |
| AEKP01170916.1 | 17881  | A | G   | 10q26.13         | 6.86  |
| AEKP01171132.1 | 8655   | G | A   | 11q13.3          | 11.88 |
| AEKP01171132.1 | 9423   | G | A   | 11q13.3          | 13.07 |
| AEKP01171765.1 | 10449  | T | C   | 4p16.3           | 7.23  |
| AEKP01171765.1 | 10481  | T | C   | 4p16.3           | 7.19  |
| AEKP01171765.1 | 10713  | C | T   | 4p16.3           | 8.87  |
| AEKP01171765.1 | 11302  | G | C   | 4p16.3           | 9.92  |
| AEKP01171765.1 | 11373  | T | C   | 4p16.3           | 10.12 |
| AEKP01171765.1 | 11515  | C | T   | 4p16.3           | 8.16  |
| AEKP01171765.1 | 11600  | C | T   | 4p16.3           | 8.42  |
| AEKP01171765.1 | 12004  | T | C   | 4p16.3           | 8.55  |
| AEKP01171765.1 | 12066  | C | A   | 4p16.3           | 9.8   |
| AEKP01171767.1 | 1097   | C | T   | 4p16.3           | 8.31  |
| AEKP01171767.1 | 1579   | A | C   | 4p16.3           | 7.65  |
| AEKP01171767.1 | 7451   | C | G   | 4p16.3           | 9.95  |
| AEKP01171767.1 | 7626   | C | G   | 4p16.3           | 8.68  |

|                |       |   |     |                  |       |
|----------------|-------|---|-----|------------------|-------|
| AEKP01171767.1 | 9132  | A | G   | 4p16.3           | 8.84  |
| AEKP01171767.1 | 9921  | A | G   | 4p16.3           | 8.95  |
| AEKP01171768.1 | 2235  | G | T   | 4p16.3           | 10.07 |
| AEKP01171768.1 | 2379  | A | G   | 4p16.3           | 10.14 |
| AEKP01173217.1 | 1116  | A | G   | 17q25.3          | 6.06  |
| AEKP01173217.1 | 16957 | G | C   | 17q25.3          | 7     |
| AEKP01173217.1 | 21850 | C | T   | 17q25.3          | 8.26  |
| AEKP01173219.1 | 3850  | T | C   | 17q25.3          | 6.45  |
| AEKP01176687.1 | 344   | C | T   | 19q13.11         | 8.79  |
| AEKP01181168.1 | 27865 | T | A   | 11q12.1          | 10.09 |
| AEKP01181168.1 | 29821 | G | A   | 11q12.1          | 6.33  |
| AEKP01181168.1 | 31855 | G | A   | 11q12.1          | 6.11  |
| AEKP01184018.1 | 62692 | C | T   | 12q12            | 7.91  |
| AEKP01188814.1 | 741   | G | A   | 16q24.2          | 13.16 |
| AEKP01191575.1 | 360   | C | T   | 6q27             | 6.12  |
| AEKP01191761.1 | 16662 | C | T   | 5p14.3           | 9.25  |
| AEKP01198281.1 | 15954 | A | G   | 5p12             | 8.33  |
| AEKP01209136.1 | 4676  | T | G   | 7q22.1           | 6.41  |
| AEKP01209136.1 | 5544  | C | T   | 7q22.1           | 8.41  |
| AEKP01209137.1 | 6490  | T | C   | 7q22.1           | 8.84  |
| AEKP01209137.1 | 8414  | C | G   | 7q22.1           | 12.95 |
| AEKP01209138.1 | 853   | C | T   | 7q22.1           | 13.48 |
| AEKP01209138.1 | 1333  | C | T   | 7q22.1           | 15.63 |
| AEKP01209139.1 | 810   | G | A   | 7q22.1           | 10.62 |
| AEKP01209144.1 | 287   | C | T   | 7q22.1           | 8.18  |
| AEKP01209144.1 | 756   | C | T   | 7q22.1           | 12.83 |
| AEKP01209148.1 | 3171  | C | A   | 7q22.1           | 10.46 |
| AEKP01209288.1 | 4087  | T | C   | 16p13.3          | 12.43 |
| AEKP01209288.1 | 4188  | A | G   | 16p13.3          | 10.08 |
| AEKP01209350.1 | 8365  | A | C/T | 3q11.2           | 11.72 |
| AEKP01209353.1 | 386   | A | G   | 3p11.1           | 6.81  |
| AEKP01209353.1 | 688   | C | T   | 3q11.2           | 13.42 |
| AEKP01209353.1 | 1260  | C | T   | 3p11.1           | 8.07  |
| AEKP01209353.1 | 3444  | A | C   | 3q11.2           | 7.91  |
| AEKP01209359.1 | 5414  | C | G   | 3q11.2           | 13.22 |
| AEKP01209359.1 | 6299  | G | T   | 3p11.1           | 6.09  |
| AEKP01210449.1 | 9378  | G | A   | 1q42.3           | 11.91 |
| AEKP01210449.1 | 10855 | T | C   | 1q42.3           | 17.57 |
| AEKP01210449.1 | 11784 | A | G   | 1q42.3           | 10.41 |
| AEKP01210449.1 | 12051 | T | A   | 1q42.3           | 6.21  |
| AEKP01210449.1 | 12867 | A | G   | 1q42.3           | 13.11 |
| AEKP01210449.1 | 13088 | G | A   | 1q42.3           | 10.41 |
| AEKP01210449.1 | 13406 | G | A   | 1q42.3           | 10.64 |
| AEKP01210449.1 | 13701 | G | A   | 1q42.3           | 7.58  |
| AEKP01210449.1 | 14218 | T | A   | 1q42.3           | 7.64  |
| AEKP01210497.1 | 2460  | G | A   | 22q11.1          | 6.31  |
| AEKP01210516.1 | 4307  | G | A   | 22q11.1          | 6.27  |
| AEKP01210516.1 | 6098  | G | A   | 22q11.1          | 6.1   |
| AEKP01210519.1 | 9475  | G | A   | 22q11.1          | 7.91  |
| AEKP01211350.1 | 1271  | C | T   | 12q12            | 14.66 |
| AEKP01211350.1 | 1390  | T | C   | 12p11.21-12p11.1 | 6.02  |
| AEKP01211350.1 | 1392  | C | T   | 12p11.21-12p11.1 | 6.21  |
| AEKP01211350.1 | 1436  | C | A   | 12q12            | 9.09  |

|                |       |   |       |               |       |
|----------------|-------|---|-------|---------------|-------|
| AEKP01211498.1 | 8951  | C | A     | 7p11.2        | 7.39  |
| AEKP01211929.1 | 6180  | A | G     | 10p11.21      | 7.66  |
| AEKP01211977.1 | 2399  | G | A     | 10q11.22      | 11.65 |
| AEKP01211977.1 | 2995  | A | G     | 10q11.23      | 7.99  |
| AEKP01211977.1 | 3447  | T | A     | 10q11.23      | 8.15  |
| AEKP01211977.1 | 3848  | G | A     | 10q11.23      | 9.25  |
| AEKP01212438.1 | 281   | G | A     | 22q11.1       | 7.22  |
| AEKP01212438.1 | 2830  | G | T     | 22q11.1       | 8.37  |
| AEKP01212443.1 | 7760  | G | T     | 22q11.1       | 8.86  |
| AEKP01212857.1 | 5248  | A | G     | 10q11.21      | 6.62  |
| AEKP01212874.1 | 1075  | C | A     | 10p11.21      | 6.73  |
| AEKP01212879.1 | 1657  | G | A     | 20q11.22      | 6.12  |
| AEKP01212879.1 | 1678  | C | T     | 20q11.21      | 6.16  |
| AEKP01213157.1 | 10570 | A | C     | 5q11.1        | 6.12  |
| AEKP01213520.1 | 204   | G | T     | 14q11.2       | 6.28  |
| AEKP01213520.1 | 205   | C | A/T   | 14q11.2       | 6.2   |
| AEKP01214478.1 | 491   | G | T     | 9p13.1        | 7.12  |
| AEKP01214482.1 | 9029  | G | A     | 9q21.12       | 6.4   |
| AEKP01214494.1 | 5701  | A | G     | 9q21.12       | 6.27  |
| AEKP01215121.1 | 2449  | A | G     | 7q11.22       | 7.11  |
| AEKP01215124.1 | 2088  | A | C     | 7p12.3        | 7.17  |
| AEKP01215124.1 | 8691  | G | A     | 7p12.3        | 6.93  |
| AEKP01215262.1 | 160   | G | A     | 6q11.1-6q11.2 | 6.98  |
| AEKP01215489.1 | 779   | A | T     | 17q11.2       | 6.88  |
| AEKP01215490.1 | 2434  | C | T     | 17p11.2       | 6.16  |
| AEKP01215490.1 | 2737  | T | A     | 17p11.2       | 6.53  |
| AEKP01215584.1 | 1153  | C | T     | 14q11.2       | 6.87  |
| AEKP01215704.1 | 2840  | G | A     | 20p11.21      | 6.61  |
| AEKP01215704.1 | 3094  | G | A     | 20q11.21      | 6.05  |
| AEKP01215704.1 | 3591  | T | C     | 20q11.21      | 6.38  |
| AEKP01215790.1 | 3778  | C | T     | 2q11.1        | 6.89  |
| AEKP01216482.1 | 394   | C | T     | 17q11.2       | 7.71  |
| AEKP01216719.1 | 4036  | T | C     | 20p11.21      | 7.57  |
| AEKP01217099.1 | 695   | A | T     | 7p12.2        | 6.19  |
| AEKP01217099.1 | 696   | A | C     | 7p12.3        | 6.15  |
| AEKP01217528.1 | 1214  | C | T     | 9q21.12       | 7.41  |
| AEKP01218556.1 | 805   | A | T     | 20q11.21      | 12.36 |
| AEKP01218574.1 | 731   | G | A     | 14q11.2       | 6.54  |
| AEKP01218574.1 | 1216  | G | A/C   | 1q21.1        | 7.07  |
| AEKP01218890.1 | 354   | T | C     | 14q11.2       | 6.16  |
| AEKP01218890.1 | 964   | T | G     | 14q11.2       | 6.67  |
| AEKP01219265.1 | 173   | A | C/T   | 7p12.3        | 6.16  |
| AEKP01219265.1 | 544   | T | C     | 7p12.3        | 6.77  |
| AEKP01219266.1 | 902   | G | C/T   | 7p12.3        | 6.99  |
| AEKP01219323.1 | 800   | A | G     | 19q13.11      | 7.17  |
| AEKP01220912.1 | 808   | T | C     | 7q11.22       | 8.02  |
| AEKP01221212.1 | 358   | G | T     | 14q11.2       | 6.2   |
| AEKP01221214.1 | 975   | G | C     | 14q11.2       | 6.33  |
| AEKP01222192.1 | 985   | G | A     | 20q11.21      | 6.32  |
| AEKP01222346.1 | 717   | C | T     | 20p11.21      | 7.29  |
| AEKP01222346.1 | 1281  | C | T     | 20q11.23      | 7.51  |
| AEKP01222346.1 | 1285  | C | T     | 20p11.21      | 7.8   |
| AEKP01222346.1 | 1287  | A | C/G/T | 20p11.21      | 8.72  |

|                |      |   |     |             |       |
|----------------|------|---|-----|-------------|-------|
| AEKP01222773.1 | 273  | T | G   | 20q11.21    | 11.13 |
| AEKP01222773.1 | 322  | A | C   | 20q11.22    | 8.56  |
| AEKP01222773.1 | 340  | T | A   | 20q11.22    | 7.44  |
| AEKP01222773.1 | 425  | G | C   | 20p11.21    | 8.46  |
| AEKP01222773.1 | 580  | A | C/G | 20p11.21    | 6.52  |
| AEKP01222773.1 | 1124 | G | A   | 20q11.21    | 6.92  |
| AEKP01222773.1 | 1351 | C | G   | 20q11.21    | 11.7  |
| AEKP01222781.1 | 821  | G | A   | 14q11.2     | 6.87  |
| AEKP01224070.1 | 1341 | G | A   | 14q11.2     | 6.74  |
| AEKP01225207.1 | 291  | A | G   | 8q24.11     | 11.71 |
| AEKP01225972.1 | 766  | A | G   | 20p11.21    | 7.04  |
| AEKP01225972.1 | 1126 | T | A   | 20q11.21    | 6.98  |
| AEKP01227454.1 | 483  | A | G   | 20q11.21    | 6.57  |
| AEKP01227454.1 | 797  | G | T   | 20q11.21    | 6.72  |
| AEKP01227454.1 | 877  | T | G   | 20p11.21    | 6.83  |
| AEKP01228136.1 | 858  | C | A   | 22q11.1     | 6.19  |
| AEKP01228275.1 | 547  | A | T   | 19p11-19q11 | 6.45  |
| AEKP01228393.1 | 171  | G | A/T | 20p11.21    | 7.6   |
| AEKP01228393.1 | 234  | G | C/T | 20p11.21    | 6.91  |
| AEKP01228393.1 | 377  | C | T   | 20p11.21    | 6.1   |
| AEKP01228393.1 | 664  | C | A   | 20q11.21    | 6.04  |
| AEKP01228393.1 | 816  | G | A/C | 20p11.21    | 8.12  |
| AEKP01228393.1 | 876  | G | A   | 20q11.21    | 6.03  |
| AEKP01228393.1 | 924  | G | C   | 20q11.21    | 11.01 |

**Table S2.** Mapped scaffolds from hs37d5.

| Accession   | Clone/Scaffold Name | Length  | Decoy   | Mapping  | SNPs LOD $\geq$ 6 |
|-------------|---------------------|---------|---------|----------|-------------------|
| AC006359.3  | DJ1135M02           | 118,730 | 14,732  | 1p12     | 1                 |
| AC006453.3  | RP4-614C10          | 155,313 | 21,861  | 2q11.1   | 20                |
| AC010098.8  | RP11-400J9          | 176,043 | 35,075  | 1q21.1   | 4                 |
| AC011850.12 | RP11-364J18         | 164,681 | 164,681 | 20q11.21 | 6                 |
| AC018688.9  | RP11-462H3          | 170,204 | 163,121 | 20q11.22 | 15                |
| AC018692.9  | RP11-555K2          | 189,789 | 189,789 | 21q11.2  | 3                 |
| AC026131.4  | RP11-458M15         | 174,688 | 30,524  | 10p11.21 | 7                 |
| AC026273.7  | CTD-2314M3          | 144,645 | 118,722 | 2p11.2   | 11                |
| AC040978.8  | RP11-570L14         | 180,983 | 2,300   | 8q24.3   | 10                |
| AC069213.22 | RP11-338O10         | 171,460 | 27,162  | 3q29     | 24                |
| AC079801.2  | RP11-717F1          | 177,312 | 172,228 | 21q11.2  | 9                 |
| AC079934.3  | RP11-327C24         | 47,736  | 47,736  | 1q21.1   | 2                 |
| AC092107.5  | RP11-755J8          | 137,617 | 135,288 | 20q11.21 | 4                 |
| AC093749.3  | RP11-30B7           | 163,102 | 160,389 | 22q11.1  | 1                 |
| AC099395.2  | CTD-2152B9          | 67,826  | 9,511   | 7q34     | 1                 |
| AC104301.2  | RP11-150N22         | 189,610 | 180,137 | 20q11.22 | 82                |
| AC109135.2  | RP11-240C17         | 175,099 | 117,528 | 1q21.1   | 8                 |
| AC110072.3  | RP11-18C16          | 188,672 | 125,028 | 7p11.2   | 1                 |
| AC114745.6  | RP11-116D16         | 142,666 | 1,718   | 2q31.1   | 1                 |
| AC114936.2  | CTD-2185N3          | 84,596  | 2,801   | 5q35.3   | 1                 |
| AC116618.4  | RP11-98L17          | 153,040 | 148,815 | 22q11.21 | 2                 |
| AC127380.4  | RP11-1324J5         | 198,735 | 194,259 | 9q21.11  | 1                 |
| AC127701.2  | RP11-79F18          | 161,405 | 77,395  | 7p12.3   | 3                 |
| AC129531.8  | RP11-188B1          | 164,068 | 30,549  | 17q24.1  | 26                |
| AC129664.7  | RP11-237A9          | 183,495 | 183,411 | 21q11.2  | 1                 |
| AC129779.2  | RP11-1360O11        | 28,549  | 26,797  | 16q12.1  | 1                 |
| AC129782.3  | RP11-28O7           | 66,860  | 66,199  | 1q21.1   | 2                 |
| AC133920.2  | RP11-413O9          | 197,357 | 56,111  | 16p11.2  | 1                 |
| AC136499.2  | RP11-240C14         | 92,689  | 92,689  | 5p12     | 16                |
| AC137488.2  | CTD-2506I5          | 167,135 | 121,805 | 22q11.21 | 1                 |
| AC138774.4  | RP11-1320P3         | 194,050 | 158,495 | 14q11.2  | 2                 |
| AC144895.2  | RP11-399H16         | 153,799 | 102,820 | 2p11.2   | 6                 |
| AC144896.3  | RP11-1129K24        | 161,471 | 120,715 | 2p11.2   | 6                 |
| AC145060.2  | XXfos-801911F12     | 38,914  | 38,914  | 8q11.21  | 1                 |
| AC145166.2  | XXfos-82794E5       | 37,498  | 37,498  | 17p11.2  | 1                 |
| AC145205.2  | RP11-1224M18        | 81,310  | 81,310  | 17q25.3  | 23                |
| AC145209.2  | XXfos-85688H6       | 41,001  | 41,001  | 17q25.3  | 1                 |
| AC153808.1  | fa0674              | 34,038  | 20,788  | 10q26.2  | 1                 |
| AC158326.1  | WI2-3051A23         | 37,697  | 8,962   | 12q13.3  | 3                 |
| AC187650.1  | WI2-3349D13         | 37,072  | 21,332  | 17q25.3  | 20                |
| AC187817.1  | WI2-2097P24         | 43,487  | 23,470  | 17p11.2  | 2                 |
| AC195745.1  | WI2-486E17          | 38,794  | 13,408  | 12q24.32 | 5                 |
| AC196515.1  | WI2-1526M3          | 40,094  | 9,066   | 8q24.21  | 2                 |
| AC203638.2  | ABC10-44051000F11   | 39,904  | 7,806   | 16q23.1  | 5                 |
| AC203659.3  | ABC10-45533600F2    | 39,607  | 7,564   | 15q11.2  | 2                 |
| AC206474.2  | ABC10-44704200O4    | 38,506  | 2,995   | 21q21.3  | 1                 |
| AC206587.3  | ABC9-41277500N5     | 36,826  | 2,094   | 19p13.3  | 1                 |

|            |                       |         |        |          |    |
|------------|-----------------------|---------|--------|----------|----|
| AC206743.2 | ABC9-43938300A6       | 38,082  | 12,585 | 21q11.2  | 3  |
| AC207442.4 | ABC9-43902500N11      | 38,709  | 3,865  | 1q44     | 4  |
| AC207597.3 | ABC9-41234200G22      | 36,552  | 2,814  | 13q21.33 | 1  |
| AC207713.3 | ABC9-43995000N18      | 37,010  | 2,575  | 14q21.3  | 1  |
| AC207999.3 | ABC10-44707100B13     | 39,056  | 3,998  | 2p25.2   | 2  |
| AC208064.3 | ABC10-1622670B2       | 39,836  | 6,955  | 4q31.3   | 1  |
| AC208152.3 | ABC9-43938200G13      | 42,503  | 8,786  | 3q26.1   | 4  |
| AC208170.4 | ABC9-45484000L12      | 40,315  | 16,845 | 2q31.1   | 3  |
| AC208171.3 | ABC9-43903900J14      | 39,420  | 7,758  | 5q23.1   | 3  |
| AC208500.2 | ABC9-43832800J17      | 41,730  | 7,052  | 12q14.1  | 1  |
| AC208585.5 | ABC9-43863900H3       | 35,221  | 3,717  | 21q21.1  | 2  |
| AC208587.4 | ABC9-43972000F21      | 33,595  | 5,012  | 11p15.5  | 1  |
| AC208871.3 | ABC12-46761600C20     | 38,697  | 4,091  | 2q37.3   | 25 |
| AC209007.3 | ABC9-41296000J2       | 35,161  | 7,238  | 1p35.2   | 6  |
| AC209232.3 | ABC9-46008800D8       | 38,735  | 7,503  | 1p36.12  | 15 |
| AC209234.3 | ABC9-44043600B8       | 39,351  | 27,833 | 6q14.1   | 3  |
| AC209236.4 | ABC9-43918400K12      | 37,276  | 11,573 | 20q13.13 | 2  |
| AC209310.3 | ABC10-45493300P2      | 36,495  | 4,496  | 19p13.3  | 3  |
| AC209618.3 | ABC10-44079000E18     | 37,236  | 3,203  | 22q12.3  | 2  |
| AC210865.4 | ABC12-49210300E11     | 38,499  | 3,328  | 17q25.1  | 1  |
| AC212296.2 | ABC9-43936400D18      | 36,649  | 7,777  | 1p31.1   | 1  |
| AC212752.2 | ABC9-43902800P4       | 42,518  | 1,407  | 1q31.3   | 1  |
| AC212759.2 | ABC9-43831400G1       | 41,068  | 6,898  | 13q31.1  | 4  |
| AC213027.4 | ABC10-44501900J7      | 38,460  | 4,132  | 17q21.31 | 1  |
| AC213033.3 | ABC9-43852500P10      | 39,631  | 10,276 | 3p13     | 3  |
| AC213191.1 | WI2-1064N2            | 37,442  | 2,144  | 15q24.2  | 3  |
| AC213223.1 | ABC7_000042515900_E16 | 33,893  | 11,260 | 11q12.1  | 9  |
| AC215700.3 | ABC13-47640400A11     | 35,726  | 3,691  | 14q32.12 | 3  |
| AC215710.4 | ABC9-41232900G14      | 36,238  | 5,238  | 9q33.3   | 4  |
| AC216142.3 | ABC13-48647000H2      | 39,729  | 6,162  | 2q24.2   | 4  |
| AC216971.3 | ABC13-47619300L5      | 40,594  | 6,861  | 18q22.3  | 2  |
| AC217018.3 | ABC11-49495200J4      | 40,240  | 31,693 | 7q22.1   | 14 |
| AC223430.3 | ABC10-45542300G14     | 41,361  | 6,423  | 8p23.1   | 6  |
| AC223431.3 | ABC9-44019700C24      | 36,110  | 4,777  | 12p13.1  | 7  |
| AC225099.4 | ABC12-47020000H10     | 39,795  | 4,329  | 1q43     | 1  |
| AC225168.3 | ABC11-48431600C18     | 38,740  | 31,731 | 6q27     | 1  |
| AC225595.1 | ABC14-50997500E11     | 37,409  | 3,242  | 11q13.4  | 1  |
| AC225768.2 | ABC14-50084100O22     | 37,715  | 4,608  | 2q33.3   | 3  |
| AC225889.3 | ABC8-5698349N15       | 43,395  | 21,776 | 20p11.21 | 12 |
| AC226622.3 | ABC11-47381000M22     | 39,605  | 7,382  | 14q21.3  | 1  |
| AC226627.3 | ABC12-46374000B15     | 38,104  | 3,715  | 16q22.2  | 7  |
| AC226758.3 | ABC11-47366600H9      | 39,227  | 6,112  | 4q22.1   | 1  |
| AC231386.2 | ABC10-44487500M2      | 41,035  | 5,537  | 17q21.2  | 6  |
| AC231980.2 | ABC8-21269400I17      | 28,355  | 3,471  | 2q14.1   | 1  |
| AC231987.2 | ABC7-42756300M20      | 34,193  | 2,646  | 19q13.11 | 1  |
| AC231988.2 | ABC7-42509700P1       | 34,660  | 13,974 | 18q22.1  | 3  |
| AC233266.3 | CH17-257B11           | 200,859 | 52,993 | 2p11.2   | 11 |
| AC233274.2 | ABC8-41097800F4       | 35,644  | 1,353  | 17p13.3  | 1  |
| AC233698.3 | CH17-16P3             | 205,905 | 6,425  | 17q12    | 5  |
| AC233702.5 | CH17-53B9             | 237,913 | 32,188 | 17p11.2  | 8  |
| AC233714.2 | ABC7-43046200P7       | 35,470  | 10,287 | 6q27     | 1  |
| AC233754.2 | ABC9-43854500L1       | 40,574  | 36,331 | 6p12.3   | 2  |
| AC234063.4 | RP11-281H18           | 171,953 | 97,656 | 17q24.1  | 41 |

|                |                       |         |        |                   |    |
|----------------|-----------------------|---------|--------|-------------------|----|
| AC234228.3     | ABC9-43863900G3       | 37,788  | 7,491  | 3q29              | 4  |
| AC234301.2     | ABC10-44687300P14     | 40,906  | 7,464  | 14q32.33          | 2  |
| AC234421.2     | ABC9-43854600O13      | 41,090  | 34,654 | 11q13.4           | 9  |
| AC235759.2     | ABC11-48400200G4      | 36,760  | 1,961  | 12q21.1           | 1  |
| AC235952.3     | ABC8-26193400I12      | 37,021  | 27,265 | 3p14.1            | 6  |
| AC238709.3     | ABC24-1841L3          | 39,139  | 7,161  | 19q13.11          | 4  |
| AC238893.3     | ABC22-1574J16         | 39,703  | 22,567 | 19p13.2           | 1  |
| AC238894.3     | ABC22-2602C16         | 40,215  | 1,247  | 20q13.33          | 1  |
| AC238958.2     | ABC16-1709C3          | 37,499  | 3,948  | 2q21.3            | 1  |
| AC239584.4     | CH17-186K1            | 188,924 | 7,642  | 4q13.3            | 24 |
| AC239860.3     | CH17-262O2            | 191,275 | 35,427 | 1q21.1            | 3  |
| AC239873.3     | COR2A-DD0002RKBNU_E11 | 33,126  | 5,927  | 22q11.23          | 4  |
| AC240508.1     | ABC11-47394600O21     | 42,401  | 7,660  | 3q13.2            | 1  |
| AC240577.2     | COR02-DD0002K7INU_L24 | 34,255  | 6,357  | 17q24.3           | 1  |
| AC241442.1     | ABC9-43895800H12      | 37,538  | 5,860  | 8q24.3            | 2  |
| AC241586.3     | CH17-289G7            | 221,610 | 28,747 | 1p11.2            | 3  |
| AC241851.2     | ABC13-47492900H13     | 39,984  | 33,962 | 2q11.1            | 2  |
| AC242001.2     | WI2-612D10            | 44,131  | 43,899 | 5p12              | 9  |
| AC242192.3     | ABC7-40649600O11      | 37,234  | 28,496 | 20q11.21          | 14 |
| AC242285.2     | ABC12-47837900C21     | 39,826  | 39,826 | 20q11.21          | 5  |
| AC242289.3     | ABC12-49026200G7      | 40,614  | 8,222  | 1p36.22           | 2  |
| AC242309.1     | ABC11-47398500K24     | 38,951  | 4,865  | 3p24.3            | 2  |
| AC242666.3     | ABC14-50103400N18     | 38,443  | 6,146  | 10p11.21          | 1  |
| AC243974.2     | CH17-93H22            | 121,220 | 1,892  | 12p13.2           | 2  |
| AC244027.1     | COR2A-DD0002JKHNU_B6  | 34,792  | 6,912  | 1p36.22           | 1  |
| AEKP01009090.1 | cont1.9089            | 60,077  | 1,074  | 9q34.2            | 1  |
| AEKP01009295.1 | cont1.9294            | 14,377  | 14,377 | 9q34.3            | 1  |
| AEKP01009296.1 | cont1.9295            | 16,094  | 14,517 | 9q34.3            | 1  |
| AEKP01012023.1 | cont1.12022           | 4,355   | 1,736  | 10p11.21          | 1  |
| AEKP01020329.1 | cont1.20328           | 4,582   | 1,081  | 18q21.2           | 1  |
| AEKP01020477.1 | cont1.20476           | 8,842   | 3,808  | 18q21.2           | 2  |
| AEKP01021472.1 | cont1.21471           | 9,483   | 5,611  | 18q22.2           | 1  |
| AEKP01024816.1 | cont1.24815           | 32,224  | 22,293 | 3p14.1            | 7  |
| AEKP01026639.1 | cont1.26638           | 3,561   | 2,484  | 14q32.33          | 1  |
| AEKP01028421.1 | cont1.28420           | 96,894  | 12,145 | 15q22.31          | 1  |
| AEKP01028972.1 | cont1.28971           | 16,178  | 2,500  | 3q21.2            | 1  |
| AEKP01032148.1 | cont1.32147           | 37,486  | 5,971  | 12q24.11          | 2  |
| AEKP01044255.1 | cont1.44254           | 14,218  | 5,728  | 2q37.1            | 1  |
| AEKP01044945.1 | cont1.44944           | 9,837   | 1,557  | 3q29              | 1  |
| AEKP01046855.1 | cont1.46854           | 3,745   | 1,005  | 13q12.3           | 2  |
| AEKP01047722.1 | cont1.47721           | 32,455  | 1,613  | 13q14.11          | 1  |
| AEKP01050701.1 | cont1.50700           | 4,230   | 2,041  | 12p13.2           | 2  |
| AEKP01050790.1 | cont1.50789           | 6,030   | 6,030  | 6q27              | 3  |
| AEKP01050831.1 | cont1.50830           | 15,490  | 1,610  | 6q27              | 2  |
| AEKP01056923.1 | cont1.56922           | 44,610  | 1,178  | 3q26.2            | 2  |
| AEKP01061772.1 | cont1.61771           | 43,189  | 2,299  | 8p21.3            | 3  |
| AEKP01069476.1 | cont1.69475           | 13,001  | 4,083  | 20q11.21-20q11.22 | 2  |
| AEKP01069477.1 | cont1.69476           | 9,737   | 7,071  | 20q11.22          | 2  |
| AEKP01075945.1 | cont1.75944           | 77,014  | 1,958  | 20p11.21          | 2  |
| AEKP01077264.1 | cont1.77263           | 8,234   | 1,805  | 9q21.13           | 3  |
| AEKP01079279.1 | cont1.79278           | 5,514   | 4,061  | 7q32.1            | 1  |
| AEKP01079702.1 | cont1.79701           | 98,915  | 1,105  | 7q33              | 1  |
| AEKP01080035.1 | cont1.80034           | 25,499  | 9,388  | 7q34              | 8  |



|                |              |         |        |          |    |
|----------------|--------------|---------|--------|----------|----|
| AEKP01080279.1 | cont1.80278  | 22,430  | 10,454 | 7q35     | 1  |
| AEKP01091774.1 | cont1.91773  | 31,102  | 1,619  | 1q24.1   | 1  |
| AEKP01093265.1 | cont1.93264  | 12,586  | 4,377  | 10q21.1  | 4  |
| AEKP01094557.1 | cont1.94556  | 29,486  | 7,518  | 17q22    | 6  |
| AEKP01095456.1 | cont1.95455  | 8,628   | 1,113  | 7q21.11  | 4  |
| AEKP01110547.1 | cont1.110546 | 6,594   | 1,045  | 21q22.3  | 1  |
| AEKP01110973.1 | cont1.110972 | 11,849  | 4,287  | 2q34     | 1  |
| AEKP01114218.1 | cont1.114217 | 57,236  | 13,684 | 1q32.1   | 4  |
| AEKP01117124.1 | cont1.117123 | 55,082  | 42,365 | 6q16.1   | 3  |
| AEKP01122432.1 | cont1.122431 | 38,407  | 1,352  | 10q24.1  | 2  |
| AEKP01126737.1 | cont1.126736 | 4,528   | 1,320  | 12p13.31 | 1  |
| AEKP01128935.1 | cont1.128934 | 4,427   | 1,283  | 14q12    | 1  |
| AEKP01132292.1 | cont1.132291 | 9,536   | 7,504  | 22q13.32 | 2  |
| AEKP01139726.1 | cont1.139725 | 31,970  | 2,488  | 1q42.2   | 1  |
| AEKP01147502.1 | cont1.147501 | 23,922  | 11,216 | 10q26.3  | 4  |
| AEKP01149793.1 | cont1.149792 | 16,840  | 3,873  | 13q34    | 2  |
| AEKP01149802.1 | cont1.149801 | 16,247  | 16,247 | 13q34    | 1  |
| AEKP01150066.1 | cont1.150065 | 8,530   | 4,752  | 13q34    | 1  |
| AEKP01151782.1 | cont1.151781 | 33,761  | 2,376  | 4p16.1   | 6  |
| AEKP01153555.1 | cont1.153554 | 2,878   | 2,275  | 7p22.3   | 3  |
| AEKP01153556.1 | cont1.153555 | 6,466   | 5,252  | 7p22.3   | 3  |
| AEKP01158634.1 | cont1.158633 | 1,609   | 1,540  | 12q12    | 1  |
| AEKP01158635.1 | cont1.158634 | 2,490   | 2,490  | 12q12    | 2  |
| AEKP01158637.1 | cont1.158636 | 20,364  | 11,908 | 12q12    | 28 |
| AEKP01163119.1 | cont1.163118 | 8,153   | 1,242  | 1p36.22  | 1  |
| AEKP01166084.1 | cont1.166083 | 15,980  | 11,428 | 9q22.1   | 4  |
| AEKP01166223.1 | cont1.166222 | 23,702  | 14,069 | 9q22.2   | 3  |
| AEKP01166227.1 | cont1.166226 | 111,583 | 67,571 | 9q22.2   | 12 |
| AEKP01170916.1 | cont1.170915 | 54,457  | 38,372 | 10q26.13 | 1  |
| AEKP01171132.1 | cont1.171131 | 27,684  | 2,699  | 11q13.3  | 2  |
| AEKP01171765.1 | cont1.171764 | 15,614  | 15,533 | 4p16.3   | 9  |
| AEKP01171767.1 | cont1.171766 | 12,179  | 11,981 | 4p16.3   | 6  |
| AEKP01171768.1 | cont1.171767 | 47,781  | 4,064  | 4p16.3   | 2  |
| AEKP01173217.1 | cont1.173216 | 25,635  | 25,474 | 17q25.3  | 3  |
| AEKP01173219.1 | cont1.173218 | 26,006  | 3,984  | 17q25.3  | 1  |
| AEKP01176687.1 | cont1.176686 | 1,255   | 1,255  | 19q13.11 | 1  |
| AEKP01181168.1 | cont1.181167 | 44,379  | 7,585  | 11q12.1  | 3  |
| AEKP01184018.1 | cont1.184017 | 88,451  | 7,607  | 12q12    | 1  |
| AEKP01188814.1 | cont1.188813 | 11,669  | 11,669 | 16q24.2  | 1  |
| AEKP01191575.1 | cont1.191574 | 1,752   | 1,752  | 6q27     | 1  |
| AEKP01191761.1 | cont1.191760 | 17,200  | 1,836  | 5p14.3   | 1  |
| AEKP01198281.1 | cont1.198280 | 18,164  | 5,288  | 5p12     | 1  |
| AEKP01209136.1 | cont1.209135 | 10,581  | 5,765  | 7q22.1   | 2  |
| AEKP01209137.1 | cont1.209136 | 10,770  | 10,770 | 7q22.1   | 2  |
| AEKP01209138.1 | cont1.209137 | 5,856   | 5,856  | 7q22.1   | 2  |
| AEKP01209139.1 | cont1.209138 | 1,658   | 1,658  | 7q22.1   | 1  |
| AEKP01209144.1 | cont1.209143 | 1,729   | 1,729  | 7q22.1   | 2  |
| AEKP01209148.1 | cont1.209147 | 3,389   | 3,319  | 7q22.1   | 1  |
| AEKP01209288.1 | cont1.209287 | 10,110  | 6,084  | 16p13.3  | 2  |
| AEKP01209350.1 | cont1.209349 | 13,208  | 13,113 | 3q11.2   | 1  |
| AEKP01209353.1 | cont1.209352 | 4,596   | 4,505  | 3q11.2   | 4  |
| AEKP01209359.1 | cont1.209358 | 8,943   | 8,943  | 3q11.2   | 2  |
| AEKP01210449.1 | cont1.210448 | 21,797  | 15,950 | 1q42.3   | 9  |

|                |              |         |         |               |    |
|----------------|--------------|---------|---------|---------------|----|
| AEKP01210497.1 | cont1.210496 | 3,956   | 3,831   | 22q11.1       | 1  |
| AEKP01210516.1 | cont1.210515 | 12,668  | 12,668  | 22q11.1       | 2  |
| AEKP01210519.1 | cont1.210518 | 10,880  | 10,880  | 22q11.1       | 1  |
| AEKP01211350.1 | cont1.211349 | 2,435   | 2,268   | 12q12         | 4  |
| AEKP01211498.1 | cont1.211497 | 12,825  | 12,825  | 7p11.2        | 1  |
| AEKP01211929.1 | cont1.211928 | 22,974  | 22,522  | 10p11.21      | 1  |
| AEKP01211977.1 | cont1.211976 | 15,803  | 4,693   | 10q11.22      | 4  |
| AEKP01212438.1 | cont1.212437 | 3,817   | 3,741   | 22q11.1       | 2  |
| AEKP01212443.1 | cont1.212442 | 8,634   | 8,634   | 22q11.1       | 1  |
| AEKP01212857.1 | cont1.212856 | 9,281   | 9,105   | 10q11.21      | 1  |
| AEKP01212874.1 | cont1.212873 | 1,737   | 1,737   | 10p11.21      | 1  |
| AEKP01212879.1 | cont1.212878 | 2,735   | 2,622   | 20q11.21      | 2  |
| AEKP01213157.1 | cont1.213156 | 13,593  | 2,647   | 5q11.1        | 1  |
| AEKP01213520.1 | cont1.213519 | 1,700   | 1,641   | 14q11.2       | 2  |
| AEKP01214478.1 | cont1.214477 | 2,284   | 2,284   | 9p13.1        | 1  |
| AEKP01214482.1 | cont1.214481 | 10,358  | 10,358  | 9q21.12       | 1  |
| AEKP01214494.1 | cont1.214493 | 12,031  | 11,113  | 9q21.12       | 1  |
| AEKP01215121.1 | cont1.215120 | 9,333   | 9,280   | 7q11.22       | 1  |
| AEKP01215124.1 | cont1.215123 | 12,576  | 12,473  | 7p12.3        | 2  |
| AEKP01215262.1 | cont1.215261 | 1,238   | 1,183   | 6q11.1-6q11.2 | 1  |
| AEKP01215489.1 | cont1.215488 | 1,432   | 1,432   | 17q11.2       | 1  |
| AEKP01215490.1 | cont1.215489 | 10,488  | 10,488  | 17p11.2       | 2  |
| AEKP01215584.1 | cont1.215583 | 1,877   | 1,833   | 14q11.2       | 1  |
| AEKP01215704.1 | cont1.215703 | 4,355   | 4,277   | 20p11.21      | 3  |
| AEKP01215790.1 | cont1.215789 | 7,472   | 7,403   | 2q11.1        | 1  |
| AEKP01216482.1 | cont1.216481 | 1,322   | 1,261   | 17q11.2       | 1  |
| AEKP01216719.1 | cont1.216718 | 4,931   | 4,795   | 20p11.21      | 1  |
| AEKP01217099.1 | cont1.217098 | 1,259   | 1,159   | 7p12.2        | 2  |
| AEKP01217528.1 | cont1.217527 | 1,411   | 1,267   | 9q21.12       | 1  |
| AEKP01218556.1 | cont1.218555 | 1,510   | 1,415   | 20q11.21      | 1  |
| AEKP01218574.1 | cont1.218573 | 1,784   | 1,727   | 1q21.1        | 2  |
| AEKP01218890.1 | cont1.218889 | 1,645   | 1,431   | 14q11.2       | 2  |
| AEKP01219265.1 | cont1.219264 | 1,137   | 1,046   | 7p12.3        | 2  |
| AEKP01219266.1 | cont1.219265 | 2,540   | 2,446   | 7p12.3        | 1  |
| AEKP01219323.1 | cont1.219322 | 1,976   | 1,976   | 19q13.11      | 1  |
| AEKP01220912.1 | cont1.220911 | 2,423   | 2,299   | 7q11.22       | 1  |
| AEKP01221212.1 | cont1.221211 | 1,126   | 1,080   | 14q11.2       | 1  |
| AEKP01221214.1 | cont1.221213 | 1,761   | 1,528   | 14q11.2       | 1  |
| AEKP01222192.1 | cont1.222191 | 1,422   | 1,327   | 20q11.21      | 1  |
| AEKP01222346.1 | cont1.222345 | 1,365   | 1,365   | 20p11.21      | 4  |
| AEKP01222773.1 | cont1.222772 | 1,601   | 1,601   | 20q11.21      | 7  |
| AEKP01222781.1 | cont1.222780 | 1,390   | 1,390   | 14q11.2       | 1  |
| AEKP01224070.1 | cont1.224069 | 2,441   | 2,441   | 14q11.2       | 1  |
| AEKP01225207.1 | cont1.225206 | 1,600   | 1,071   | 8q24.11       | 1  |
| AEKP01225972.1 | cont1.225971 | 1,436   | 1,349   | 20p11.21      | 2  |
| AEKP01227454.1 | cont1.227453 | 1,257   | 1,098   | 20p11.21      | 3  |
| AEKP01228136.1 | cont1.228135 | 1,201   | 1,201   | 22q11.1       | 1  |
| AEKP01228275.1 | cont1.228274 | 1,192   | 1,031   | 19p11-19q11   | 1  |
| AEKP01228393.1 | cont1.228392 | 1,184   | 1,090   | 20q11.21      | 7  |
| AL137861.5     | RP4-813B7    | 127,682 | 97,063  | 1q21.1        | 1  |
| AL163540.11    | RP11-348N17  | 166,566 | 166,566 | 9q21.12       | 41 |
| AL354926.17    | RP1-216J23   | 163,140 | 128,103 | 3p11.1        | 5  |
| AL356585.7     | RP11-341D18  | 186,858 | 186,858 | 13q12.11      | 18 |

|                |                    |            |         |                  |     |
|----------------|--------------------|------------|---------|------------------|-----|
| AL360154.30    | RP11-499D3         | 240,434    | 240,434 | 1q21.2           | 45  |
| AL590523.5     | RP11-565G5         | 155,397    | 155,397 | 3q11.2           | 1   |
| AL591856.26    | RP11-426M5         | 179,693    | 179,693 | 4q31.3           | 1   |
| AL592188.60    | RP11-337M7         | 161,802    | 161,802 | 1p36.11          | 1   |
| AL772161.10    | CTD-2612A24        | 149,482    | 2,624   | 9q34.2           | 1   |
| AL837517.14    | RP11-20K6          | 90,085     | 90,085  | 20q11.21         | 63  |
| AL845331.2     | RP11-407P15        | 185,111    | 53,859  | 2p11.2           | 5   |
| AL929347.8     | RP3-433O3          | 128,374    | 128,374 | 6p25.3           | 5   |
| BX072566.10    | RP11-25L22         | 164,239    | 164,239 | 21q11.2          | 1   |
| BX088702.10    | RP11-49E18         | 169,874    | 169,874 | 9q21.11          | 1   |
| BX119317.2     | RP5-875J12         | 40,176     | 29,109  | 1p11.2           | 1   |
| BX546479.5     | RP11-438N17        | 172,294    | 172,294 | 1q21.1           | 3   |
| BX640538.4     | RP6-238B6          | 165,731    | 162,788 | 9p13.1           | 2   |
| CR854858.22    | RP13-177J6         | 168,039    | 16,141  | 1p36.22          | 7   |
| CT963082.1     | SC22CB-105A1       | 34,474     | 34,474  | 14q11.2          | 2   |
| CU459023.3     | SC22CB-53A6        | 39,929     | 39,929  | 22q11.21         | 1   |
| CU459188.2     | SC22CB-79C9        | 38,502     | 38,502  | 22q12.1          | 1   |
| CU459200.1     | SC22CB-33E8        | 39,786     | 39,786  | 22q12.3          | 7   |
| CU463998.4     | SC22CB-18G3        | 41,933     | 41,933  | 14q11.2          | 11  |
| FP325312.10    | CH17-297E19        | 167,577    | 59,872  | 16q12.1          | 2   |
| FP325329.5     | CH17-92N24         | 133,324    | 77,650  | 6p11.1-6q11.1    | 5   |
| FP565171.2     | ABC11-4932300O16   | 40,072     | 39,099  | 10q26.3          | 1   |
| FP565324.3     | ABC13-47488600E17  | 29,640     | 27,640  | 13q34            | 1   |
| FP565421.3     | ABC8-2141940I11    | 28,391     | 26,391  | 20p11.21         | 17  |
| FP565794.2     | ABC10-44500200G24  | 36,974     | 34,835  | 10q11.21         | 2   |
| FP565795.1     | ABC10-44589700B18  | 44,161     | 42,366  | 6q27             | 1   |
| FP671131.2     | ABC10-44560800J4   | 25,376     | 23,376  | 9q22.2           | 6   |
| FP885534.9     | RP11-687L3         | 50,801     | 44,125  | 6q21             | 2   |
| FP885917.2     | ABC9-43970700E22   | 40,121     | 39,233  | 18p11.21-18q11.1 | 4   |
| GL383545.1     | REGION16           | 179,254    | 47,381  | 10p12.1          | 2   |
| GL383561.1     | REGION27           | 406,963    | 7,464   | 17q11.2          | 1   |
| GL582971.1     | TRB                | 1,284,284  | 132,050 | 7q34             | 64  |
| NW_001837937.2 | SCAF_1103279181459 | 348,326    | 47,196  | 10p11.21         | 3   |
| NW_001837939.1 | SCAF_1103279188024 | 187,120    | 30,782  | 10p11.21         | 1   |
| NW_001837986.1 | SCAF_1103279188100 | 18,599,630 | 12,365  | 10q21.3          | 6   |
| NW_001837992.1 | SCAF_1103279188224 | 2,546,465  | 4,273   | 10q23.2          | 2   |
| NW_001838006.2 | SCAF_1103279188397 | 24,511,762 | 4,806   | 10q26.11         | 1   |
| NW_001838009.1 | SCAF_1103279187648 | 183,966    | 105,860 | 10q26.13         | 27  |
| NW_001838012.1 | SCAF_1103279186286 | 717,948    | 2,968   | 10q26.3          | 7   |
| NW_001838014.1 | SCAF_1103279182339 | 2,024,395  | 52,053  | 10q26.3          | 4   |
| NW_001838016.1 | SCAF_1103279187360 | 831,883    | 19,470  | 11p15.5          | 2   |
| NW_001838022.2 | SCAF_1103279188392 | 42,354,830 | 44,599  | 11p11.2          | 3   |
| NW_001838025.2 | SCAF_1103279188141 | 4,754,575  | 8,414   | 11q13.3          | 1   |
| NW_001838027.1 | SCAF_1103279184614 | 1,630,675  | 3,202   | 11q13.3          | 1   |
| NW_001838028.2 | SCAF_1103279187758 | 16,912,879 | 12,876  | 11q13.4          | 1   |
| NW_001838042.2 | SCAF_1103279188268 | 30,784,356 | 20,684  | 11q21            | 2   |
| NW_001838050.1 | SCAF_1103279187803 | 1,606,017  | 4,504   | 12p13.31         | 2   |
| NW_001838055.2 | SCAF_1103279188198 | 3,582,625  | 15,543  | 12q12            | 25  |
| NW_001838056.1 | SCAF_1103279188339 | 2,924,792  | 234,350 | 12q12            | 127 |
| NW_001838061.2 | SCAF_1103279188362 | 32,873,191 | 8,284   | 12q23.3          | 3   |
| NW_001838069.1 | SCAF_1103279188411 | 4,447,775  | 4,432   | 13q12.12         | 7   |
| NW_001838084.2 | SCAF_1103279188152 | 25,468,656 | 11,670  | 13q33.3          | 1   |
| NW_001838112.2 | SCAF_1103279188136 | 3,450,084  | 2,162   | 14q24.2          | 1   |

|                |                                      |            |         |                  |    |
|----------------|--------------------------------------|------------|---------|------------------|----|
| NW_001838115.2 | SCAF_1103279188327                   | 8,970,161  | 1,895   | 14q32.2-14q32.31 | 2  |
| NW_001838199.1 | SCAF_1103279184670                   | 1,181,317  | 6,876   | 15q13.1          | 1  |
| NW_001838285.2 | SCAF_1103279187918                   | 288,509    | 68,646  | 16q11.2          | 6  |
| NW_001838286.2 | SCAF_1103279180723                   | 1,738,874  | 505,951 | 16q12.1          | 83 |
| NW_001838329.1 | SCAF_1103279188231                   | 1,979,435  | 2,492   | 16q24.1          | 1  |
| NW_001838403.1 | SCAF_1103279188371                   | 15,048,748 | 17,176  | 17p13.3          | 4  |
| NW_001838429.2 | SCAF_1103279182626                   | 710,255    | 50,898  | 17p11.2          | 6  |
| NW_001838456.2 | SCAF_1103279186804                   | 462,643    | 11,216  | 17q25.3          | 3  |
| NW_001838458.1 | SCAF_1103279188205                   | 1,243,949  | 12,718  | 17q25.3          | 1  |
| NW_001838466.2 | SCAF_1103279188324                   | 595,963    | 61,453  | 18p11.21         | 40 |
| NW_001838467.2 | SCAF_1103279188127                   | 26,055,378 | 12,843  | 18p11.21         | 4  |
| NW_001838469.1 | SCAF_1103279188375                   | 20,098,677 | 11,986  | 18q22.1          | 1  |
| NW_001838473.1 | SCAF_1103279186821                   | 2,011,078  | 13,895  | 18q23            | 2  |
| NW_001838484.1 | SCAF_1103279188355                   | 9,820,154  | 49,698  | 19p12            | 1  |
| NW_001838489.1 | SCAF_1103279179572                   | 63,702     | 30,907  | 5p12             | 1  |
| NW_001838549.1 | SCAF_1103279188217:1-11933214        | 11,933,214 | 14,071  | 1q42.3           | 5  |
| NW_001838554.1 | SCAF_1103279188199                   | 1,916,163  | 6,875   | 1q44             | 1  |
| NW_001838579.2 | SCAF_1103279188432                   | 32,841,984 | 17,941  | 1p32.3           | 1  |
| NW_001838585.1 | SCAF_1103279187495                   | 1,892,662  | 48,900  | 1p36.33          | 2  |
| NW_001838589.2 | SCAF_1103279188310                   | 20,217,283 | 56,133  | 1p21.1           | 2  |
| NW_001838662.2 | SCAF_1103279181968                   | 316,248    | 48,949  | 20q11.21         | 50 |
| NW_001838663.1 | SCAF_1103279187386                   | 295,056    | 56,886  | 20p11.21         | 28 |
| NW_001838664.2 | SCAF_1103279188091                   | 5,121,961  | 12,718  | 20p11.21         | 6  |
| NW_001838666.1 | SCAF_1103279188360                   | 19,874,876 | 55,848  | 20q13.2          | 4  |
| NW_001838706.1 | SCAF_1103279188379                   | 23,891,590 | 18,190  | 21q22.11         | 22 |
| NW_001838735.2 | SCAF_1103279180335                   | 2,346,680  | 510,555 | 22q11.1          | 2  |
| NW_001838740.2 | SCAF_1103279187391                   | 770,531    | 7,936   | 22q11.21         | 1  |
| NW_001838745.1 | SCAF_1103279188372                   | 21,026,802 | 27,266  | 22q13.2          | 5  |
| NW_001838758.1 | SCAF_1103279188242                   | 1,278,286  | 6,393   | 2p25.3           | 2  |
| NW_001838768.1 | SCAF_1103279188306                   | 8,993,619  | 5,458   | 2p23.3           | 1  |
| NW_001838769.1 | SCAF_1103279188433                   | 57,109,151 | 14,905  | 2p22.1           | 3  |
| NW_001838799.1 | SCAF_1103279187941                   | 77,227     | 53,458  | 2p11.2           | 85 |
| NW_001838806.2 | SCAF_1103279183166                   | 107,815    | 21,640  | 2p11.2           | 5  |
| NW_001838807.2 | SCAF_1103279181286                   | 951,222    | 71,847  | 2p11.2           | 13 |
| NW_001838847.2 | SCAF_1103279188313                   | 6,770,479  | 7,915   | 2q14.1           | 1  |
| NW_001838860.1 | SCAF_1103279181862                   | 20,525,979 | 5,817   | 2q24.1           | 1  |
| NW_001838867.2 | SCAF_1103279180702                   | 2,142,460  | 5,013   | 2q37.1           | 2  |
| NW_001838876.2 | SCAF_1103279188107                   | 10,342,433 | 7,252   | 3p26.3           | 1  |
| NW_001838877.2 | SCAF_1103279188143                   | 55,925,128 | 62,829  | 3p14.3           | 14 |
| NW_001838879.1 | SCAF_1103279181846                   | 3,863,712  | 253,661 | 3p11.1           | 64 |
| NW_001838880.2 | SCAF_1103279188151                   | 4,994,819  | 86,920  | 3p12.1           | 9  |
| NW_001838881.2 | SCAF_1103279188393:20988471-42876610 | 21,888,140 | 2,368   | 3q13.13          | 1  |
| NW_001838884.2 | SCAF_1103279188385                   | 64,955,803 | 14,029  | 3q25.2           | 3  |
| NW_001838889.1 | SCAF_1103279188225                   | 1,691,284  | 9,954   | 3q29             | 2  |
| NW_001838901.1 | SCAF_1103279188431                   | 6,914,347  | 6,035   | 4p15.1           | 2  |
| NW_001838913.1 | SCAF_1103279181232                   | 7,095,704  | 13,225  | 4q13.1           | 2  |
| NW_001838915.1 | SCAF_1103279188399                   | 43,867,763 | 6,670   | 4q13.3           | 1  |
| NW_001838921.1 | SCAF_1103279188415                   | 50,948,600 | 44,793  | 4q35.1           | 3  |
| NW_001838926.1 | SCAF_1103279187504                   | 3,561,194  | 8,372   | 5p15.31          | 1  |
| NW_001838929.1 | SCAF_1103279188406:7331849-20130985  | 12,799,137 | 85,783  | 6q11.1           | 3  |
| NW_001838933.1 | SCAF_1103279188142                   | 10,735,191 | 37,203  | 5p12             | 2  |
| NW_001838952.2 | SCAF_1103279188412                   | 47,124,617 | 42,331  | 5q23.2           | 4  |
| NW_001838981.2 | SCAF_1103279188350                   | 17,736,765 | 167,567 | 6p12.1           | 8  |

|                |                                   |            |         |               |    |
|----------------|-----------------------------------|------------|---------|---------------|----|
| NW_001838983.1 | SCAF_1103279187980                | 515,533    | 5,787   | 6q11.1-6q11.2 | 1  |
| NW_001838984.1 | SCAF_1103279188263                | 3,180,744  | 461,141 | 6q12          | 36 |
| NW_001838987.1 | SCAF_1103279188274:60646-25191606 | 25,130,961 | 24,481  | 6q16.1        | 2  |
| NW_001838988.2 | SCAF_1103279187031                | 10,950,630 | 152,217 | 6q16.1        | 1  |
| NW_001838990.2 | SCAF_1103279188145                | 51,215,202 | 112,932 | 6q21          | 11 |
| NW_001838996.1 | SCAF_1103279188185                | 691,607    | 89,190  | 6q27          | 7  |
| NW_001839003.1 | SCAF_1103279188377                | 33,027,203 | 41,774  | 7p21.3        | 3  |
| NW_001839018.1 | SCAF_1103279187706                | 240,985    | 159,296 | 7q11.22       | 6  |
| NW_001839023.2 | SCAF_1103279188202                | 312,589    | 159,421 | 7q11.22       | 11 |
| NW_001839067.2 | SCAF_1103279185247                | 1,526,694  | 6,785   | 7q21.3        | 1  |
| NW_001839071.2 | SCAF_1103279188381:1-28934855     | 28,934,855 | 42,219  | 7q32.2        | 22 |
| NW_001839100.2 | SCAF_1103279188209                | 4,027,619  | 25,399  | 7q36.3        | 1  |
| NW_001839139.2 | SCAF_1103279186098                | 4,277,699  | 1,949   | 8q24.23       | 8  |
| NW_001839142.2 | SCAF_1103279181985                | 2,453,829  | 29,853  | 8q24.3        | 4  |
| NW_001839149.2 | SCAF_1103279188402                | 35,741,120 | 9,784   | 9p24.1        | 4  |
| NW_001839181.1 | SCAF_1103279188214                | 367,065    | 162,509 | 9q21.13       | 6  |
| NW_001839219.2 | SCAF_1103279187839                | 28,192     | 5,648   | 9q21.12       | 1  |
| NW_001839221.1 | SCAF_1103279188227                | 17,664,250 | 7,247   | 9q21.13       | 1  |
| NW_001839223.1 | SCAF_1103279187577                | 814,651    | 5,913   | 9q22.1        | 1  |
| NW_001839257.1 | SCAF_1103279179615                | 225,507    | 182,490 | 20q11.21      | 69 |
| NW_001839258.1 | SCAF_1103279179617                | 23,552     | 4,054   | 7q11.21       | 2  |
| NW_001839268.1 | SCAF_1103279179655                | 4,205      | 4,149   | 20p11.21      | 7  |
| NW_001839279.1 | SCAF_1103279179721                | 45,506     | 12,596  | 19p12         | 1  |
| NW_001839286.1 | SCAF_1103279179741                | 19,762     | 8,898   | 1q21.1        | 1  |
| NW_001839300.1 | SCAF_1103279179811                | 37,096     | 13,637  | 14q11.2       | 2  |
| NW_001839307.1 | SCAF_1103279179860                | 12,194     | 4,623   | 5p12          | 1  |
| NW_001839317.1 | SCAF_1103279179890                | 27,533     | 21,136  | 1q32.1        | 10 |
| NW_001839334.1 | SCAF_1103279179957                | 4,026      | 3,950   | 10p11.21      | 4  |
| NW_001839350.1 | SCAF_1103279180002                | 10,938     | 3,389   | 19p12         | 3  |
| NW_001839364.1 | SCAF_1103279180085                | 305,597    | 216,524 | 3q11.2        | 25 |
| NW_001839405.1 | SCAF_1103279180252                | 20,378     | 5,155   | 2q11.1        | 17 |
| NW_001839418.1 | SCAF_1103279180290                | 11,803     | 4,717   | 12q12         | 8  |
| NW_001839429.1 | SCAF_1103279180349                | 13,686     | 6,348   | 9q21.12       | 1  |
| NW_001839440.1 | SCAF_1103279180389                | 5,542      | 4,425   | 2p11.2        | 5  |
| NW_001839441.1 | SCAF_1103279180390                | 14,270     | 9,135   | 14q11.2       | 1  |
| NW_001839455.1 | SCAF_1103279180438                | 169,268    | 140,423 | 17p11.2       | 6  |
| NW_001839457.1 | SCAF_1103279180444                | 4,134      | 4,035   | 9p13.1        | 1  |
| NW_001839464.1 | SCAF_1103279180463                | 21,025     | 9,442   | 7q35          | 6  |
| NW_001839466.1 | SCAF_1103279180476                | 14,211     | 6,167   | 4p16.3        | 5  |
| NW_001839470.1 | SCAF_1103279180485                | 11,026     | 2,225   | 1q21.1        | 1  |
| NW_001839474.1 | SCAF_1103279180492                | 11,363     | 6,303   | 10q11.21      | 2  |
| NW_001839481.1 | SCAF_1103279180532                | 12,184     | 4,909   | 10q11.21      | 1  |
| NW_001839485.1 | SCAF_1103279180542                | 14,951     | 7,243   | 5p13.1        | 1  |
| NW_001839494.1 | SCAF_1103279180589                | 4,982      | 4,982   | 22q11.1       | 1  |
| NW_001839509.1 | SCAF_1103279180643                | 3,290      | 3,227   | 2p11.2        | 1  |
| NW_001839547.1 | SCAF_1103279180785                | 54,570     | 12,353  | 20p11.1       | 4  |
| NW_001839568.1 | SCAF_1103279180886                | 3,150      | 3,150   | 20q11.21      | 1  |
| NW_001839575.1 | SCAF_1103279180913                | 53,931     | 7,256   | 9q21.12       | 1  |
| NW_001839576.1 | SCAF_1103279180920                | 5,162      | 5,052   | 19p12         | 1  |
| NW_001839589.1 | SCAF_1103279180967                | 39,004     | 5,687   | 14q11.2       | 1  |
| NW_001839590.1 | SCAF_1103279180983                | 3,007      | 2,951   | 20q11.21      | 4  |
| NW_001839600.1 | SCAF_1103279181023                | 15,237     | 5,789   | 5p12          | 1  |
| NW_001839641.1 | SCAF_1103279181193                | 14,442     | 14,101  | 2p11.2        | 22 |

|                |                    |         |         |          |    |
|----------------|--------------------|---------|---------|----------|----|
| NW_001839653.1 | SCAF_1103279181245 | 3,038   | 3,038   | 3p12.1   | 1  |
| NW_001839668.1 | SCAF_1103279181301 | 58,705  | 37,056  | 7p12.3   | 2  |
| NW_001839689.1 | SCAF_1103279181399 | 76,390  | 18,782  | 14q11.2  | 2  |
| NW_001839704.1 | SCAF_1103279181475 | 88,633  | 64,502  | 5q11.1   | 3  |
| NW_001839705.1 | SCAF_1103279181493 | 39,662  | 8,736   | 1p11.2   | 1  |
| NW_001839712.1 | SCAF_1103279181566 | 13,748  | 3,972   | 9q21.11  | 1  |
| NW_001839714.1 | SCAF_1103279181573 | 36,894  | 3,491   | 20p11.21 | 7  |
| NW_001839716.1 | SCAF_1103279181584 | 59,624  | 44,986  | 13q13.3  | 1  |
| NW_001839718.1 | SCAF_1103279181586 | 3,218   | 2,768   | 1q21.1   | 2  |
| NW_001839722.1 | SCAF_1103279181625 | 5,487   | 4,347   | 3p11.1   | 1  |
| NW_001839726.1 | SCAF_1103279181650 | 14,913  | 8,073   | 16q12.1  | 2  |
| NW_001839736.1 | SCAF_1103279181691 | 13,880  | 4,202   | 12q12    | 2  |
| NW_001839744.1 | SCAF_1103279181723 | 33,098  | 27,795  | 22q11.1  | 1  |
| NW_001839760.1 | SCAF_1103279181781 | 263,990 | 248,231 | 17q11.2  | 11 |
| NW_001839762.1 | SCAF_1103279181785 | 35,236  | 4,654   | 10p11.21 | 1  |
| NW_001839774.1 | SCAF_1103279181847 | 36,558  | 6,558   | 12q12    | 1  |
| NW_001839779.1 | SCAF_1103279181883 | 45,737  | 24,731  | 5p12     | 1  |
| NW_001839806.1 | SCAF_1103279182011 | 14,258  | 8,695   | 20q11.21 | 6  |
| NW_001839822.1 | SCAF_1103279182087 | 53,383  | 18,813  | 9q21.12  | 2  |
| NW_001839831.1 | SCAF_1103279182117 | 5,626   | 5,567   | 17q11.2  | 2  |
| NW_001839840.1 | SCAF_1103279182164 | 4,274   | 4,178   | 14q11.2  | 1  |
| NW_001839850.1 | SCAF_1103279182216 | 3,652   | 3,652   | 1q21.1   | 1  |
| NW_001839852.1 | SCAF_1103279182221 | 3,578   | 3,351   | 9q21.12  | 1  |
| NW_001839865.1 | SCAF_1103279182265 | 4,723   | 4,647   | 5p12     | 3  |
| NW_001839881.1 | SCAF_1103279182341 | 10,738  | 3,753   | 20q11.21 | 1  |
| NW_001839898.1 | SCAF_1103279182416 | 13,662  | 4,625   | 20q11.21 | 3  |
| NW_001839932.1 | SCAF_1103279182604 | 4,745   | 4,745   | 19p12    | 1  |
| NW_001839938.1 | SCAF_1103279182628 | 12,420  | 4,027   | 20p11.21 | 1  |
| NW_001839949.1 | SCAF_1103279182683 | 38,869  | 34,700  | 7p12.1   | 3  |
| NW_001839952.1 | SCAF_1103279182690 | 3,194   | 1,876   | 20q11.21 | 1  |
| NW_001839960.1 | SCAF_1103279182733 | 17,278  | 12,992  | 18p11.21 | 18 |
| NW_001839963.1 | SCAF_1103279182739 | 4,777   | 4,777   | 1q21.1   | 1  |
| NW_001839966.1 | SCAF_1103279182751 | 5,350   | 5,350   | 20p11.21 | 13 |
| NW_001839996.1 | SCAF_1103279182892 | 13,991  | 6,974   | 9q34.12  | 1  |
| NW_001840009.1 | SCAF_1103279182967 | 3,339   | 3,339   | 10q11.21 | 2  |
| NW_001840030.1 | SCAF_1103279183074 | 3,006   | 3,006   | 16q12.1  | 1  |
| NW_001840034.1 | SCAF_1103279183087 | 11,396  | 4,614   | 20p11.1  | 1  |
| NW_001840050.1 | SCAF_1103279183150 | 12,207  | 7,001   | 20p11.21 | 15 |
| NW_001840060.1 | SCAF_1103279183226 | 13,388  | 6,799   | 7p11.2   | 2  |
| NW_001840082.1 | SCAF_1103279183379 | 4,221   | 4,143   | 20q11.21 | 3  |
| NW_001840086.1 | SCAF_1103279183386 | 21,096  | 12,602  | 18p11.21 | 14 |
| NW_001840094.1 | SCAF_1103279183433 | 3,007   | 3,007   | 12p11.1  | 1  |
| NW_001840121.1 | SCAF_1103279183563 | 14,000  | 7,733   | 20p11.21 | 9  |
| NW_001840125.1 | SCAF_1103279183583 | 10,436  | 3,674   | 20q11.22 | 8  |
| NW_001840164.1 | SCAF_1103279183789 | 5,748   | 5,512   | 1q21.1   | 2  |
| NW_001840172.1 | SCAF_1103279183820 | 4,416   | 4,416   | 1q21.1   | 1  |
| NW_001840180.1 | SCAF_1103279183858 | 35,330  | 32,542  | 1q21.1   | 1  |
| NW_001840192.1 | SCAF_1103279183904 | 11,622  | 4,012   | 7p12.3   | 2  |
| NW_001840200.1 | SCAF_1103279183995 | 4,129   | 2,907   | 3q29     | 2  |
| NW_001840224.1 | SCAF_1103279184105 | 13,030  | 7,087   | 1q21.1   | 1  |
| NW_001840232.1 | SCAF_1103279184124 | 10,236  | 3,185   | 20q11.21 | 6  |
| NW_001840239.1 | SCAF_1103279184164 | 10,711  | 4,817   | 10p11.21 | 1  |
| NW_001840272.1 | SCAF_1103279184280 | 91,309  | 63,415  | 5p12     | 5  |

|                |                    |         |         |          |     |
|----------------|--------------------|---------|---------|----------|-----|
| NW_001840274.1 | SCAF_1103279184286 | 3,642   | 3,264   | 14q11.2  | 1   |
| NW_001840304.1 | SCAF_1103279184408 | 3,861   | 3,861   | 4q12     | 1   |
| NW_001840306.1 | SCAF_1103279184412 | 82,586  | 76,259  | 13q34    | 10  |
| NW_001840308.1 | SCAF_1103279184421 | 14,200  | 4,517   | 9p13.1   | 1   |
| NW_001840319.1 | SCAF_1103279184495 | 12,306  | 5,868   | 9q21.12  | 1   |
| NW_001840338.1 | SCAF_1103279184630 | 3,120   | 3,036   | 20p11.21 | 5   |
| NW_001840347.1 | SCAF_1103279184674 | 19,009  | 11,659  | 9p13.1   | 1   |
| NW_001840348.1 | SCAF_1103279184675 | 88,285  | 34,964  | 20p11.1  | 25  |
| NW_001840369.1 | SCAF_1103279184782 | 12,450  | 5,356   | 20p11.21 | 9   |
| NW_001840386.1 | SCAF_1103279184888 | 3,189   | 3,084   | 9q21.12  | 2   |
| NW_001840413.1 | SCAF_1103279185004 | 14,578  | 5,220   | 20p11.21 | 4   |
| NW_001840418.1 | SCAF_1103279185030 | 39,158  | 3,989   | 9p13.1   | 1   |
| NW_001840421.1 | SCAF_1103279185068 | 5,660   | 5,660   | 18p11.21 | 9   |
| NW_001840441.1 | SCAF_1103279185189 | 7,079   | 6,986   | 21q11.2  | 2   |
| NW_001840462.1 | SCAF_1103279185353 | 32,764  | 5,811   | 19p12    | 1   |
| NW_001840472.1 | SCAF_1103279185423 | 6,289   | 6,289   | 10p11.21 | 1   |
| NW_001840490.1 | SCAF_1103279185530 | 19,232  | 9,527   | 1p11.2   | 2   |
| NW_001840518.1 | SCAF_1103279185683 | 22,827  | 9,204   | 14q11.2  | 1   |
| NW_001840527.1 | SCAF_1103279185726 | 11,395  | 7,557   | 10p11.21 | 1   |
| NW_001840531.1 | SCAF_1103279185762 | 33,349  | 14,950  | 20q11.21 | 3   |
| NW_001840538.1 | SCAF_1103279185805 | 26,018  | 14,227  | 9q21.11  | 1   |
| NW_001840540.1 | SCAF_1103279185819 | 3,136   | 3,073   | 10q11.21 | 1   |
| NW_001840543.1 | SCAF_1103279185839 | 18,371  | 7,872   | 12q12    | 1   |
| NW_001840549.1 | SCAF_1103279185868 | 5,251   | 5,251   | 9q34.11  | 1   |
| NW_001840553.1 | SCAF_1103279185890 | 3,118   | 3,020   | 12q14.2  | 1   |
| NW_001840555.1 | SCAF_1103279185898 | 3,417   | 3,252   | 5q11.1   | 2   |
| NW_001840567.1 | SCAF_1103279185985 | 3,625   | 3,559   | 10p11.21 | 1   |
| NW_001840592.1 | SCAF_1103279186144 | 3,166   | 3,067   | 9q21.12  | 1   |
| NW_001840621.1 | SCAF_1103279186335 | 14,852  | 12,808  | 5q11.1   | 1   |
| NW_001840631.1 | SCAF_1103279186405 | 11,846  | 4,850   | 9q21.11  | 2   |
| NW_001840640.1 | SCAF_1103279186445 | 4,648   | 4,648   | 20p11.21 | 4   |
| NW_001840653.1 | SCAF_1103279186520 | 5,868   | 5,680   | 22q11.1  | 1   |
| NW_001840675.1 | SCAF_1103279186599 | 3,152   | 2,959   | 5q11.2   | 1   |
| NW_001840704.1 | SCAF_1103279186747 | 3,804   | 3,804   | 7q22.1   | 4   |
| NW_001840711.1 | SCAF_1103279186778 | 4,420   | 4,356   | 14q11.2  | 1   |
| NW_001840755.1 | SCAF_1103279187026 | 4,258   | 4,258   | 7q22.1   | 2   |
| NW_001840761.1 | SCAF_1103279187072 | 17,538  | 11,160  | 1q21.1   | 1   |
| NW_001840766.1 | SCAF_1103279187088 | 3,282   | 3,282   | 20p11.1  | 2   |
| NW_001840780.1 | SCAF_1103279187167 | 89,142  | 88,478  | 20q11.21 | 78  |
| NW_001840794.1 | SCAF_1103279187258 | 16,168  | 8,462   | 14q11.2  | 4   |
| NW_001840806.1 | SCAF_1103279187348 | 3,879   | 3,831   | 21q11.2  | 1   |
| NW_001840814.1 | SCAF_1103279187370 | 11,651  | 6,972   | 20p11.21 | 5   |
| NW_001840853.1 | SCAF_1103279187452 | 363,655 | 261,565 | 20q11.22 | 320 |
| NW_001840862.1 | SCAF_1103279187463 | 3,235   | 3,235   | 12q12    | 5   |
| NW_001840871.1 | SCAF_1103279187484 | 156,877 | 155,201 | 22q11.1  | 4   |
| NW_001840887.1 | SCAF_1103279187521 | 3,749   | 3,639   | 1q21.1   | 1   |
| NW_001840932.1 | SCAF_1103279187607 | 3,474   | 3,474   | 12q12    | 7   |
| NW_001840933.1 | SCAF_1103279187616 | 48,268  | 48,268  | 22q11.1  | 1   |
| NW_001840943.1 | SCAF_1103279187638 | 5,503   | 5,503   | 20p11.21 | 10  |
| NW_001840944.1 | SCAF_1103279187639 | 3,766   | 3,687   | 14q11.2  | 1   |
| NW_001840947.1 | SCAF_1103279187643 | 3,849   | 3,782   | 9q21.12  | 1   |
| NW_001840958.1 | SCAF_1103279187667 | 3,071   | 3,071   | 1q21.1   | 1   |
| NW_001840993.1 | SCAF_1103279187740 | 12,132  | 6,609   | 20q11.21 | 5   |

|                |                     |         |         |               |     |
|----------------|---------------------|---------|---------|---------------|-----|
| NW_001841011.1 | SCAF_1103279187792  | 251,763 | 239,330 | 1p12          | 14  |
| NW_001841025.1 | SCAF_1103279187832  | 3,158   | 2,914   | 2q11.2        | 3   |
| NW_001841032.1 | SCAF_1103279187853  | 3,978   | 3,609   | 2p11.2        | 4   |
| NW_001841035.1 | SCAF_1103279187862  | 4,944   | 4,847   | 20q11.21      | 2   |
| NW_001841050.1 | SCAF_1103279187924  | 12,699  | 6,241   | 19p12         | 1   |
| NW_001841051.1 | SCAF_1103279187926  | 176,562 | 70,819  | 1q21.1        | 2   |
| NW_001841054.1 | SCAF_1103279187930  | 280,839 | 268,346 | 17p11.2       | 13  |
| NW_001841056.1 | SCAF_1103279187934  | 26,514  | 25,181  | 18p11.21      | 52  |
| NW_001841068.1 | SCAF_1103279187958  | 3,224   | 3,172   | 13q11         | 1   |
| NW_001841078.1 | SCAF_1103279187972  | 20,990  | 15,502  | 20q11.22      | 6   |
| NW_001841084.1 | SCAF_1103279187989  | 3,877   | 3,802   | 1q21.1        | 1   |
| NW_001841085.1 | SCAF_1103279187990  | 13,591  | 13,591  | 2q11.2        | 3   |
| NW_001841091.1 | SCAF_1103279188000  | 20,412  | 20,412  | 18p11.21      | 47  |
| NW_001841098.1 | SCAF_1103279188014  | 4,352   | 4,352   | 20p11.21      | 10  |
| NW_001841099.1 | SCAF_1103279188015  | 32,454  | 32,308  | 20p11.21      | 13  |
| NW_001841101.1 | SCAF_1103279188017  | 34,319  | 20,305  | 14q11.2       | 1   |
| NW_001841108.1 | SCAF_1103279188031  | 5,318   | 5,318   | 3p11.1        | 2   |
| NW_001841116.1 | SCAF_1103279188052  | 36,577  | 31,126  | 5p12          | 9   |
| NW_001841117.1 | SCAF_1103279188056  | 37,888  | 19,447  | 10p11.21      | 1   |
| NW_001841120.1 | SCAF_1103279188063  | 3,276   | 3,276   | 20p11.21      | 1   |
| NW_001841133.1 | SCAF_1103279188110  | 716,511 | 574,972 | 10p11.21      | 56  |
| NW_001841138.1 | SCAF_1103279188197  | 688,672 | 656,842 | 20p11.21      | 212 |
| NW_001841141.1 | SCAF_1103279188239  | 22,544  | 7,890   | 20p11.21      | 13  |
| NW_001841142.1 | SCAF_1103279188241  | 245,808 | 198,630 | 17p11.2       | 25  |
| NW_001841146.1 | SCAF_1103279188290  | 239,334 | 33,943  | 1q21.1        | 1   |
| NW_001841147.1 | SCAF_1103279188291  | 14,700  | 4,996   | 20p11.21      | 9   |
| NW_001841149.1 | SCAF_1103279188305  | 238,759 | 177,897 | 2q21.2        | 5   |
| NW_001841150.1 | SCAF_1103279188307  | 215,476 | 165,462 | 1q21.1        | 13  |
| NW_001841153.1 | SCAF_1103279188321  | 68,244  | 16,625  | 20q11.22      | 12  |
| NW_001841154.1 | SCAF_1103279188326  | 55,597  | 37,268  | 9p13.2        | 4   |
| NW_001841156.1 | SCAF_1103279188364  | 23,312  | 9,806   | 20p11.1       | 4   |
| NW_001841160.1 | SCAF_1103279188429  | 182,978 | 162,352 | 7q11.22       | 37  |
| NW_001841237.1 | DEGEN_1103279037427 | 9,774   | 9,708   | 17p11.2       | 1   |
| NW_001841385.1 | DEGEN_1103279049829 | 6,570   | 6,502   | 2p11.2        | 6   |
| NW_001841388.1 | DEGEN_1103279050516 | 10,174  | 10,174  | 22q11.1       | 1   |
| NW_001841394.1 | DEGEN_1103279050907 | 21,097  | 21,034  | 2p11.2        | 8   |
| NW_001841516.1 | DEGEN_1103279063758 | 11,012  | 10,286  | 2q11.1        | 9   |
| NW_001841590.1 | DEGEN_1103279070022 | 16,535  | 16,383  | 22q11.1       | 1   |
| NW_001841755.1 | DEGEN_1103279083568 | 8,426   | 8,091   | 2q11.1        | 10  |
| NW_001841768.1 | DEGEN_1103279084627 | 11,413  | 11,182  | 2p11.1-2q11.1 | 1   |
| NW_001841965.1 | DEGEN_1103279103606 | 4,215   | 3,782   | 9q21.11       | 1   |
| NW_001841981.1 | DEGEN_1103279104790 | 3,472   | 3,472   | 21q11.2       | 1   |
| NW_001842144.1 | DEGEN_1103279122824 | 6,158   | 6,077   | 21q11.2       | 1   |
| NW_001842331.1 | DEGEN_1103279161354 | 7,336   | 6,773   | 2q11.2        | 2   |
| NW_001842432.1 | SCAF_1103279188156  | 530,963 | 327,314 | 20q11.21      | 110 |



**Table S3.** Re-mapped CNPs.

| Chromosome | Start      | End        | Mapping  | LOD score |
|------------|------------|------------|----------|-----------|
| 6          | 256,241    | 261,529    | 16p11.2  | 5.59      |
| 6          | 258,965    | 264,721    | 16p11.2  | 5.41      |
| 6          | 264,721    | 270,392    | 16p11.2  | 5.51      |
| 6          | 267,343    | 273,146    | 16p11.2  | 5.28      |
| 6          | 270,392    | 275,853    | 16p11.2  | 5.03      |
| 6          | 273,146    | 278,601    | 16p11.2  | 6.01      |
| 6          | 275,853    | 281,401    | 16p11.2  | 5.8       |
| 6          | 278,601    | 283,977    | 16p11.2  | 6.01      |
| 6          | 281,401    | 286,675    | 16p11.2  | 6.14      |
| 6          | 283,977    | 289,224    | 16p11.2  | 6.47      |
| 6          | 286,675    | 291,929    | 16p11.2  | 6.7       |
| 6          | 289,224    | 294,450    | 16p11.2  | 6.23      |
| 6          | 291,929    | 297,034    | 16p11.2  | 5.32      |
| 12         | 78,066     | 93,131     | 20q13.33 | 6.53      |
| 13         | 19,048,809 | 19,090,453 | 21q11.2  | 5.57      |
| 13         | 19,064,257 | 19,107,560 | 21q11.2  | 5.6       |
| 20         | 52,477,062 | 52,482,473 | 16p11.2  | 5.17      |

**Table S4.** Paralogous regions of sequence affected by the 16p11.2 CNPs.

| Chromosome | Start      | End        | Band    |
|------------|------------|------------|---------|
| 6          | 256,518    | 382,461    | 6p25.3  |
| 16         | 32,258,540 | 32,659,102 | 16p11.2 |
| 16         | 32,806,691 | 32,941,795 | 16p11.2 |
| 16         | 33,293,715 | 33,723,390 | 16p11.2 |
| 20         | 52,477,062 | 52,482,473 | 20q13.2 |

**Table S5.** Regions with increased read coverage.

| Chromosome | Start       | End         | Re-mapped SNPs |
|------------|-------------|-------------|----------------|
| 1          | 13,060      | 102,752     | 1              |
| 1          | 521,448     | 648,892     |                |
| 1          | 2,578,541   | 2,634,093   |                |
| 1          | 5,727,468   | 5,737,070   |                |
| 1          | 16,831,901  | 16,844,585  |                |
| 1          | 16,852,249  | 17,125,643  |                |
| 1          | 17,190,005  | 17,275,029  |                |
| 1          | 72,763,794  | 72,769,500  |                |
| 1          | 72,808,354  | 72,813,646  |                |
| 1          | 85,973,784  | 86,006,912  |                |
| 1          | 110,188,491 | 110,194,220 |                |
| 1          | 120,531,831 | 120,637,703 |                |
| 1          | 121,109,377 | 121,150,573 |                |
| 1          | 142,535,517 | 142,679,021 | 13             |
| 1          | 142,781,117 | 142,863,559 |                |
| 1          | 142,907,011 | 142,967,210 |                |
| 1          | 143,150,058 | 143,176,991 |                |
| 1          | 143,390,827 | 143,504,581 | 3              |
| 1          | 143,514,051 | 143,544,505 | 1              |
| 1          | 143,946,661 | 144,078,233 |                |
| 1          | 144,489,310 | 144,551,141 |                |
| 1          | 144,672,431 | 144,710,648 | 1              |
| 1          | 144,828,012 | 144,896,988 |                |
| 1          | 144,904,118 | 145,355,413 | 1              |
| 1          | 146,313,580 | 146,467,463 |                |
| 1          | 147,969,049 | 148,025,186 |                |
| 1          | 148,792,923 | 148,954,263 | 7              |
| 1          | 149,004,921 | 149,038,187 |                |
| 1          | 149,220,301 | 149,227,241 |                |
| 1          | 149,233,501 | 149,239,805 |                |
| 1          | 149,263,812 | 149,334,245 |                |
| 1          | 149,724,880 | 149,746,526 |                |
| 1          | 194,447,666 | 194,457,009 |                |
| 1          | 206,281,448 | 206,289,554 |                |
| 1          | 234,908,161 | 234,940,417 |                |
| 2          | 1,535,472   | 1,542,325   |                |
| 2          | 3,180,312   | 3,185,620   |                |
| 2          | 37,959,612  | 37,969,946  |                |
| 2          | 37,972,761  | 38,001,997  |                |
| 2          | 89,069,736  | 89,085,868  |                |
| 2          | 89,155,492  | 89,163,260  |                |
| 2          | 89,282,680  | 89,486,769  |                |

|   |             |             |   |
|---|-------------|-------------|---|
| 2 | 89,507,249  | 89,522,586  |   |
| 2 | 89,830,436  | 89,918,288  | 1 |
| 2 | 90,448,282  | 90,539,873  | 1 |
| 2 | 91,639,962  | 91,702,946  |   |
| 2 | 91,719,631  | 91,929,626  | 3 |
| 2 | 96,519,673  | 96,534,206  |   |
| 2 | 96,590,286  | 96,627,483  |   |
| 2 | 97,873,028  | 98,015,100  |   |
| 2 | 98,025,488  | 98,147,335  |   |
| 2 | 106,877,423 | 106,884,213 |   |
| 2 | 132,768,376 | 132,781,535 |   |
| 2 | 132,960,797 | 133,033,307 | 1 |
| 2 | 133,036,293 | 133,123,453 | 2 |
| 2 | 162,129,749 | 162,143,318 |   |
| 3 | 630,865     | 641,473     |   |
| 3 | 68,744,261  | 68,749,381  |   |
| 3 | 75,270,978  | 75,276,456  |   |
| 3 | 75,564,455  | 75,574,095  |   |
| 3 | 75,739,008  | 75,803,382  | 1 |
| 3 | 75,982,107  | 75,998,619  |   |
| 3 | 98,898,736  | 98,904,309  |   |
| 3 | 129,797,850 | 129,805,168 |   |
| 3 | 162,762,948 | 162,770,818 |   |
| 3 | 195,342,944 | 195,390,079 |   |
| 3 | 195,400,928 | 195,457,053 |   |
| 3 | 195,468,810 | 195,475,550 |   |
| 3 | 195,506,076 | 195,517,381 |   |
| 3 | 197,112,363 | 197,119,223 |   |
| 4 | 12,822      | 71,599      | 2 |
| 4 | 3,568,515   | 3,636,443   | 2 |
| 4 | 49,081,311  | 49,185,194  | 2 |
| 4 | 49,206,192  | 49,314,558  | 3 |
| 4 | 49,509,885  | 49,534,974  |   |
| 4 | 49,561,443  | 49,589,551  |   |
| 4 | 49,621,190  | 49,660,117  |   |
| 4 | 61,328,454  | 61,335,413  |   |
| 4 | 172,376,309 | 172,381,510 |   |
| 4 | 190,193,803 | 190,205,374 |   |
| 4 | 190,535,529 | 190,685,784 | 4 |
| 4 | 190,797,499 | 190,805,860 |   |
| 4 | 190,813,451 | 190,824,919 |   |
| 4 | 190,838,560 | 190,850,386 |   |
| 4 | 190,978,032 | 191,043,603 |   |
| 5 | 21,468,641  | 21,575,338  | 2 |
| 5 | 29,423,808  | 29,434,947  |   |
| 5 | 34,169,977  | 34,210,012  |   |

|   |             |             |    |
|---|-------------|-------------|----|
| 5 | 175,342,017 | 175,364,735 |    |
| 5 | 177,177,195 | 177,221,823 |    |
| 6 | 256,241     | 382,800     | 24 |
| 6 | 26,666,682  | 26,745,712  |    |
| 6 | 29,839,958  | 29,851,673  |    |
| 6 | 32,466,126  | 32,472,707  |    |
| 6 | 32,504,008  | 32,510,009  |    |
| 6 | 32,519,673  | 32,525,317  |    |
| 6 | 32,537,824  | 32,543,393  |    |
| 6 | 32,554,690  | 32,565,420  |    |
| 6 | 32,624,724  | 32,635,518  |    |
| 6 | 32,638,026  | 32,645,135  |    |
| 6 | 35,624,637  | 35,631,071  |    |
| 6 | 35,753,747  | 35,768,522  |    |
| 6 | 57,197,803  | 57,284,801  |    |
| 6 | 57,290,346  | 57,298,420  |    |
| 6 | 57,301,209  | 57,610,288  | 13 |
| 6 | 157,727,136 | 157,738,999 |    |
| 6 | 165,723,345 | 165,728,450 |    |
| 7 | 57,071,544  | 57,114,635  |    |
| 7 | 57,605,418  | 57,615,946  |    |
| 7 | 57,665,567  | 57,704,054  |    |
| 7 | 57,726,619  | 57,739,612  |    |
| 7 | 57,884,566  | 57,919,499  |    |
| 7 | 61,728,410  | 61,765,091  |    |
| 7 | 61,775,428  | 61,835,461  |    |
| 7 | 61,858,581  | 61,902,994  |    |
| 7 | 65,259,814  | 65,286,474  |    |
| 7 | 70,423,211  | 70,428,862  |    |
| 7 | 74,856,644  | 75,049,694  |    |
| 7 | 76,153,141  | 76,184,855  |    |
| 7 | 100,545,942 | 100,556,041 |    |
| 7 | 100,606,104 | 100,611,945 |    |
| 7 | 102,168,485 | 102,281,512 |    |
| 7 | 126,047,829 | 126,053,640 |    |
| 7 | 142,041,615 | 142,048,195 |    |
| 7 | 142,482,087 | 142,487,492 |    |
| 7 | 143,540,724 | 143,573,427 |    |
| 7 | 143,888,440 | 144,058,135 |    |
| 7 | 148,072,292 | 148,077,970 |    |
| 7 | 151,964,447 | 151,990,924 | 1  |
| 7 | 152,075,139 | 152,087,592 |    |
| 7 | 152,094,523 | 152,106,909 |    |
| 7 | 152,110,002 | 152,116,994 |    |
| 8 | 2,186,956   | 2,286,492   | 1  |
| 8 | 7,042,992   | 7,147,991   |    |

|    |             |             |   |
|----|-------------|-------------|---|
| 8  | 7,206,766   | 7,250,553   |   |
| 8  | 7,752,640   | 7,836,580   |   |
| 8  | 11,939,102  | 11,987,459  |   |
| 8  | 12,036,721  | 12,091,570  |   |
| 8  | 12,359,609  | 12,457,011  |   |
| 8  | 58,114,379  | 58,131,107  |   |
| 8  | 86,551,002  | 86,576,434  |   |
| 9  | 43,313,924  | 43,410,606  |   |
| 9  | 44,235,281  | 44,248,010  |   |
| 9  | 44,786,340  | 44,797,775  |   |
| 9  | 45,469,367  | 45,633,424  |   |
| 9  | 46,774,219  | 46,916,491  |   |
| 9  | 47,182,055  | 47,212,483  |   |
| 9  | 66,454,667  | 66,558,629  |   |
| 9  | 66,747,886  | 66,853,543  | 1 |
| 9  | 67,236,417  | 67,365,820  | 1 |
| 9  | 68,346,273  | 68,416,246  | 1 |
| 9  | 68,423,972  | 68,447,983  |   |
| 9  | 68,462,443  | 68,498,757  | 2 |
| 9  | 69,328,495  | 69,445,399  |   |
| 9  | 69,798,769  | 69,864,049  |   |
| 9  | 130,890,324 | 130,901,138 |   |
| 9  | 140,253,233 | 140,259,757 |   |
| 9  | 140,774,818 | 140,787,661 |   |
| 10 | 17,860,270  | 17,974,194  |   |
| 10 | 18,156,775  | 18,223,003  |   |
| 10 | 38,769,796  | 38,818,834  |   |
| 10 | 39,070,835  | 39,154,934  |   |
| 10 | 42,355,334  | 42,485,441  | 1 |
| 10 | 42,633,873  | 42,675,169  |   |
| 10 | 46,283,297  | 46,418,013  |   |
| 10 | 46,940,661  | 47,154,456  |   |
| 10 | 48,740,244  | 48,872,123  |   |
| 10 | 51,264,598  | 51,397,757  |   |
| 10 | 78,258,060  | 78,263,534  |   |
| 10 | 81,454,308  | 81,485,098  |   |
| 10 | 127,573,687 | 127,589,075 |   |
| 11 | 179,851     | 199,718     |   |
| 11 | 1,013,373   | 1,021,292   |   |
| 11 | 48,339,690  | 48,390,919  |   |
| 11 | 89,511,291  | 89,548,133  |   |
| 11 | 89,684,153  | 89,762,812  |   |
| 11 | 93,960,897  | 93,973,513  |   |
| 11 | 114,416,088 | 114,426,641 |   |
| 12 | 60,135      | 93,131      |   |
| 12 | 145,806     | 179,742     | 4 |

|    |             |             |    |
|----|-------------|-------------|----|
| 12 | 11,217,024  | 11,228,172  |    |
| 13 | 19,641,184  | 19,652,367  |    |
| 13 | 63,616,606  | 63,650,171  |    |
| 14 | 19,000,000  | 19,148,248  | 15 |
| 14 | 19,433,381  | 19,450,265  |    |
| 14 | 19,779,534  | 19,924,629  | 1  |
| 14 | 19,971,223  | 20,060,167  |    |
| 14 | 20,184,511  | 20,425,459  |    |
| 14 | 20,549,065  | 20,556,303  |    |
| 14 | 106,345,573 | 106,355,386 |    |
| 14 | 106,374,305 | 106,380,447 |    |
| 14 | 106,393,776 | 106,405,092 |    |
| 14 | 106,414,996 | 106,472,316 |    |
| 14 | 106,486,364 | 106,503,116 |    |
| 14 | 106,516,565 | 106,535,284 |    |
| 14 | 106,784,851 | 106,797,083 |    |
| 14 | 106,808,288 | 106,819,968 |    |
| 15 | 20,385,181  | 20,683,227  |    |
| 15 | 20,802,744  | 20,892,417  |    |
| 15 | 21,068,476  | 21,134,230  |    |
| 15 | 21,162,790  | 21,231,825  |    |
| 15 | 21,885,098  | 22,113,595  |    |
| 15 | 22,295,127  | 22,596,027  |    |
| 15 | 28,561,657  | 28,643,653  |    |
| 15 | 28,677,265  | 28,709,111  |    |
| 15 | 28,752,134  | 28,853,098  |    |
| 15 | 30,805,223  | 30,905,266  |    |
| 15 | 82,879,757  | 83,166,275  |    |
| 15 | 84,832,710  | 84,901,525  |    |
| 15 | 102,431,895 | 102,514,190 | 1  |
| 16 | 15,012,524  | 15,125,346  |    |
| 16 | 16,724,264  | 16,736,223  |    |
| 16 | 21,499,135  | 21,593,001  |    |
| 16 | 22,448,479  | 22,712,148  |    |
| 16 | 25,339,231  | 25,344,616  |    |
| 16 | 32,258,540  | 32,420,640  | 3  |
| 16 | 32,436,910  | 32,699,009  | 2  |
| 16 | 32,822,187  | 32,886,179  |    |
| 16 | 33,317,818  | 33,433,572  |    |
| 16 | 33,439,529  | 33,645,774  |    |
| 16 | 33,860,803  | 33,931,176  | 1  |
| 16 | 33,935,424  | 34,022,051  |    |
| 16 | 46,385,801  | 46,463,269  |    |
| 16 | 46,491,046  | 46,502,472  |    |
| 16 | 48,504,114  | 48,514,634  |    |
| 16 | 70,156,065  | 70,198,189  |    |

|    |            |            |    |
|----|------------|------------|----|
| 16 | 74,394,493 | 74,452,906 |    |
| 16 | 85,584,997 | 85,590,823 |    |
| 16 | 90,177,291 | 90,294,673 |    |
| 17 | 161,259    | 170,939    |    |
| 17 | 18,380,187 | 18,413,890 |    |
| 17 | 21,192,501 | 21,258,384 |    |
| 17 | 21,301,638 | 21,355,862 |    |
| 17 | 21,506,404 | 21,566,604 |    |
| 17 | 21,666,610 | 21,700,923 |    |
| 17 | 21,897,862 | 21,913,807 |    |
| 17 | 25,263,006 | 25,310,123 |    |
| 17 | 25,313,926 | 25,321,486 |    |
| 17 | 25,325,557 | 25,337,344 |    |
| 17 | 36,251,401 | 36,412,020 |    |
| 17 | 41,375,832 | 41,387,243 |    |
| 17 | 41,393,617 | 41,406,076 |    |
| 17 | 41,460,587 | 41,469,788 |    |
| 17 | 43,645,320 | 43,665,789 |    |
| 17 | 44,367,527 | 44,457,240 |    |
| 17 | 81,151,973 | 81,194,981 |    |
| 18 | 10,394     | 34,335     | 1  |
| 18 | 54,946,156 | 54,951,632 |    |
| 19 | 61,274     | 238,793    | 3  |
| 19 | 4,041,543  | 4,049,937  |    |
| 19 | 7,510,960  | 7,520,327  |    |
| 19 | 21,749,684 | 21,758,578 |    |
| 19 | 24,507,551 | 24,597,742 | 12 |
| 19 | 27,817,572 | 27,956,340 | 9  |
| 19 | 50,585,783 | 50,647,776 |    |
| 20 | 25,732,841 | 25,755,722 | 1  |
| 20 | 25,897,048 | 25,918,252 |    |
| 20 | 26,076,114 | 26,086,966 |    |
| 20 | 26,122,900 | 26,134,033 |    |
| 20 | 26,137,632 | 26,151,995 |    |
| 20 | 26,195,430 | 26,223,404 |    |
| 20 | 26,247,540 | 26,256,454 |    |
| 20 | 29,419,593 | 29,438,229 |    |
| 20 | 29,443,139 | 29,479,277 |    |
| 20 | 29,575,979 | 29,653,899 |    |
| 20 | 52,477,062 | 52,482,473 |    |
| 21 | 9,411,193  | 9,451,023  |    |
| 21 | 9,573,976  | 9,595,468  |    |
| 21 | 9,645,571  | 9,676,547  |    |
| 21 | 9,825,512  | 9,913,676  |    |
| 21 | 10,367,334 | 10,647,854 | 1  |
| 21 | 10,700,021 | 11,053,534 | 12 |

|    |            |            |   |
|----|------------|------------|---|
| 21 | 11,068,249 | 11,187,831 | 4 |
| 21 | 14,338,130 | 14,388,261 | 7 |
| 21 | 14,416,485 | 14,443,895 | 1 |
| 22 | 16,281,598 | 16,384,631 |   |
| 22 | 18,867,556 | 18,889,041 | 1 |
| 22 | 24,286,572 | 24,311,484 |   |
| 22 | 24,392,908 | 24,403,025 |   |



**Table S6. Re-mapped SNPs.**

| Chromosome | Position    | rsID        | Reference | Alternate | Mapping       | LOD Score |
|------------|-------------|-------------|-----------|-----------|---------------|-----------|
| 1          | 98,583      | rs141344361 | T         | A         | 11p15.5       | 6.24      |
| 1          | 142,555,441 | rs61804523  | G         | A         | 12q24.32      | 6.04      |
| 1          | 142,579,951 | rs4491077   | A         | G         | 18q12.1       | 6.24      |
| 1          | 142,584,338 | rs4847786   | T         | A         | 4q12          | 7.36      |
| 1          | 142,590,495 | rs61803514  | T         | C         | 4q12          | 6.39      |
| 1          | 142,593,364 | NA          | C         | T         | 4q12          | 6.65      |
| 1          | 142,595,626 | rs71253624  | C         | T         | 4p11          | 7.19      |
| 1          | 142,617,456 | rs3123009   | T         | C         | 4q12          | 9.16      |
| 1          | 142,617,572 | rs2484382   | A         | C         | 4q12          | 6.33      |
| 1          | 142,622,161 | rs113840455 | G         | A         | 4p12          | 6.9       |
| 1          | 142,632,270 | rs12402411  | G         | T         | 4q12          | 6.05      |
| 1          | 142,675,156 | rs12407013  | A         | T         | 4q12          | 7.06      |
| 1          | 142,676,036 | rs201246195 | C         | G         | 4q12          | 6.08      |
| 1          | 142,678,954 | rs11583401  | C         | T         | 4q12          | 6.46      |
| 1          | 143,479,813 | rs7415060   | A         | G         | 14q11.2       | 6.49      |
| 1          | 143,496,361 | rs78508627  | G         | A         | 14q11.2       | 6.18      |
| 1          | 143,496,490 | rs7410886   | T         | A         | 14q11.2       | 6.13      |
| 1          | 143,540,495 | rs148547410 | G         | C         | 14q11.2       | 7.63      |
| 1          | 144,687,922 | rs72631801  | T         | C         | 15q14         | 6.34      |
| 1          | 145,123,496 | rs4266833   | G         | C         | 5p13.2        | 6.22      |
| 1          | 148,873,316 | NA          | T         | C         | 2p11.2        | 10.26     |
| 1          | 148,894,691 | rs113402056 | A         | C         | 2p11.2        | 8.99      |
| 1          | 148,906,556 | NA          | C         | A         | 2p11.2        | 8.45      |
| 1          | 148,917,126 | rs200364096 | T         | A         | 2q11.2        | 6.51      |
| 1          | 148,920,197 | NA          | C         | T         | 2p11.1-2q11.1 | 7.34      |
| 1          | 148,921,404 | rs41536044  | A         | G         | 2q11.1        | 7.23      |
| 1          | 148,948,885 | rs201348793 | A         | G         | 2q11.2        | 6.13      |
| 2          | 89,851,384  | NA          | T         | C         | 1p34.2        | 6.23      |
| 2          | 90,461,423  | NA          | T         | C         | 1q21.1        | 11.52     |
| 2          | 91,785,014  | NA          | G         | A         | 1p11.2        | 6.63      |
| 2          | 91,790,891  | NA          | A         | T         | 1q21.1        | 6.18      |
| 2          | 91,796,987  | rs61577352  | G         | T         | 1q21.1        | 9.09      |
| 2          | 133,005,528 | rs111226237 | A         | G         | 20p11.21      | 7.36      |
| 2          | 133,068,265 | NA          | A         | G         | 20p11.21      | 6.2       |
| 2          | 133,084,689 | rs62169603  | C         | T         | 20p11.21      | 6.61      |
| 3          | 75,787,302  | rs201966533 | T         | C         | 12q24.33      | 6.05      |
| 4          | 29,742      | rs10452302  | C         | T         | 13q12.2       | 6.93      |
| 4          | 67,828      | rs10452296  | G         | C         | 13q12.2       | 6.49      |
| 4          | 3,577,006   | rs77034390  | G         | T         | 9q21.13       | 6.84      |
| 4          | 3,584,746   | rs35443314  | T         | C         | 9q21.12       | 6.15      |
| 4          | 49,101,782  | NA          | A         | C/T       | 21q11.2       | 6.01      |
| 4          | 49,141,718  | NA          | A         | C/G       | 20p11.21      | 6.98      |

|   |             |             |   |   |               |       |
|---|-------------|-------------|---|---|---------------|-------|
| 4 | 49,213,485  | rs62298627  | G | C | 14q11.2       | 7.26  |
| 4 | 49,243,766  | rs12505178  | T | G | 14q11.2       | 6.22  |
| 4 | 49,247,388  | rs11937439  | C | T | 14q11.2       | 7.69  |
| 4 | 190,553,066 | NA          | C | T | 21q11.2       | 6.72  |
| 4 | 190,589,968 | rs28615433  | T | A | 14q11.2       | 6.12  |
| 4 | 190,647,627 | NA          | C | T | 14q11.2       | 6.75  |
| 4 | 190,669,836 | NA          | T | C | 14q11.2       | 6.4   |
| 5 | 21,525,743  | rs78378299  | A | G | 6q12          | 7.19  |
| 5 | 21,559,271  | rs2354604   | G | C | 6p11.1-6q11.1 | 7.21  |
| 6 | 259,489     | rs113143772 | C | A | 16p11.2       | 7.63  |
| 6 | 263,782     | rs112136141 | A | G | 16p11.2       | 6.77  |
| 6 | 266,364     | rs111298401 | T | A | 16p11.2       | 7.18  |
| 6 | 270,071     | rs111342071 | G | A | 16p11.2       | 6.11  |
| 6 | 273,980     | rs113522058 | G | A | 16p11.2       | 8.61  |
| 6 | 285,760     | rs11963362  | A | T | 16p11.2       | 6.57  |
| 6 | 289,134     | rs55997576  | T | C | 16q12.1       | 6.38  |
| 6 | 299,635     | rs28733559  | G | A | 16q12.1       | 6.37  |
| 6 | 303,404     | NA          | G | A | 16q12.1       | 7.65  |
| 6 | 305,185     | rs111741598 | T | C | 16p11.2       | 6.13  |
| 6 | 308,149     | rs112706522 | A | C | 16p11.2       | 6.26  |
| 6 | 318,070     | rs7768207   | G | A | 16p11.2       | 6.06  |
| 6 | 328,637     | rs7756502   | G | A | 16p11.2       | 7.01  |
| 6 | 342,223     | NA          | G | A | 16p11.2       | 6.62  |
| 6 | 344,878     | rs7762811   | C | T | 16p11.2       | 6.36  |
| 6 | 346,121     | rs7741779   | A | G | 16p11.2       | 7.51  |
| 6 | 346,360     | rs113672874 | G | A | 16p11.2       | 7.45  |
| 6 | 348,195     | rs7768224   | G | A | 16q12.1       | 6.7   |
| 6 | 357,884     | rs6930929   | C | T | 16p11.2       | 6.25  |
| 6 | 366,378     | rs112129307 | G | A | 16p11.2       | 6.91  |
| 6 | 367,899     | rs111318866 | C | T | 16p11.2       | 6.18  |
| 6 | 368,247     | rs112582246 | A | C | 16q12.1       | 6.03  |
| 6 | 368,635     | NA          | T | A | 16p11.2       | 6.52  |
| 6 | 377,991     | rs12524296  | T | C | 16q12.1       | 9.53  |
| 6 | 57,381,099  | rs34844018  | G | A | 3p11.1        | 8.13  |
| 6 | 57,417,450  | NA          | G | A | 3p11.1        | 9.35  |
| 6 | 57,419,359  | NA          | C | T | 3p11.1        | 8.65  |
| 6 | 57,441,202  | NA          | C | G | 3p11.1        | 7.43  |
| 6 | 57,458,006  | rs4120410   | C | T | 3p11.1        | 6.91  |
| 6 | 57,486,552  | NA          | C | T | 3p11.1        | 8.47  |
| 6 | 57,501,207  | rs3857628   | C | G | 3p11.1        | 9.11  |
| 6 | 57,511,805  | NA          | T | A | 3p11.1        | 7.1   |
| 6 | 57,537,855  | NA          | A | G | 3p11.1        | 8.72  |
| 6 | 57,558,619  | rs34141949  | G | A | 3p11.1        | 6.33  |
| 6 | 57,558,710  | NA          | G | A | 3p11.1        | 10.08 |
| 6 | 57,581,514  | NA          | G | T | 3p11.1        | 8.55  |
| 6 | 57,596,903  | rs34762248  | C | A | 3p11.1        | 9.42  |

|    |             |             |   |     |               |       |
|----|-------------|-------------|---|-----|---------------|-------|
| 7  | 151,966,853 | NA          | A | C   | 12q14.3       | 6.39  |
| 8  | 2,203,795   | rs73171445  | G | A   | 4p15.1        | 6.19  |
| 9  | 66,784,405  | NA          | G | A   | 4q22.1        | 6.84  |
| 9  | 67,355,118  | NA          | G | A   | 2p11.2        | 6.2   |
| 9  | 68,357,169  | rs200208002 | G | A   | 14q11.2       | 6.66  |
| 9  | 68,462,528  | NA          | G | A/T | 1q42.2        | 6.18  |
| 9  | 68,470,595  | NA          | A | C   | 20q11.21      | 9.8   |
| 10 | 42,395,644  | rs202098114 | A | T   | 1q21.1        | 6.1   |
| 12 | 162,755     | rs998282    | T | C   | 20q13.33      | 6.64  |
| 12 | 164,382     | rs4494357   | G | A   | 6p25.3        | 6.92  |
| 12 | 168,664     | rs57815732  | C | G   | 6p25.3        | 6.25  |
| 12 | 177,063     | rs200509469 | G | A   | 6p25.3        | 8.26  |
| 14 | 19,011,202  | rs56036688  | A | G   | 22q11.1       | 6.56  |
| 14 | 19,018,552  | rs60161770  | G | A   | 22q11.1       | 6.52  |
| 14 | 19,035,694  | rs28826094  | T | A   | 22q11.1       | 6.94  |
| 14 | 19,040,276  | NA          | T | C   | 2q21.2        | 6.38  |
| 14 | 19,040,358  | NA          | A | G   | 2q21.2        | 6.77  |
| 14 | 19,040,663  | NA          | A | T   | 2q21.2        | 6.52  |
| 14 | 19,040,702  | NA          | A | T   | 2q21.2        | 10.27 |
| 14 | 19,049,110  | rs200679136 | C | T   | 22q11.1       | 8.25  |
| 14 | 19,050,577  | rs141219139 | T | A   | 22q11.1       | 7.36  |
| 14 | 19,055,405  | rs113359464 | G | A/C | 22q11.1       | 6.77  |
| 14 | 19,059,702  | rs74242234  | A | G   | 22q11.1       | 7.07  |
| 14 | 19,066,964  | rs201856116 | C | T   | 22q11.1       | 6.6   |
| 14 | 19,104,577  | rs202063387 | C | T   | 22q11.1       | 8.25  |
| 14 | 19,109,897  | rs28415689  | G | C   | 22q11.1       | 7.24  |
| 14 | 19,123,647  | rs141790324 | C | T   | 22q11.1       | 8.56  |
| 14 | 19,793,710  | rs112440573 | C | T   | 22q11.1       | 6.47  |
| 15 | 102,446,331 | rs76132632  | C | A   | 6p25.3        | 6.08  |
| 16 | 32,345,372  | rs200178412 | C | T   | 9q34.11       | 6.06  |
| 16 | 32,401,461  | NA          | G | A   | 2p11.1-2q11.1 | 6.23  |
| 16 | 32,403,854  | rs75513833  | G | A   | 2p11.2        | 6.2   |
| 16 | 32,467,024  | NA          | G | C   | 2p11.2        | 7.94  |
| 16 | 32,481,967  | rs79757297  | T | G   | 2p11.2        | 6.59  |
| 16 | 33,926,031  | rs113802369 | T | C   | 20q11.23      | 6.34  |
| 18 | 13,868      | rs12605992  | G | A   | 10p15.3       | 6.37  |
| 19 | 95,794      | rs199696009 | A | C   | 3q29          | 6.04  |
| 19 | 96,288      | NA          | C | A   | 3q29          | 6.83  |
| 19 | 219,993     | NA          | T | C   | 5q35.3        | 6.64  |
| 19 | 24,514,914  | NA          | C | A   | 5p12          | 7.76  |
| 19 | 24,526,222  | rs112221677 | A | T   | 5p13.1        | 7.85  |
| 19 | 24,540,120  | rs8189922   | T | C   | 5p12          | 6.61  |
| 19 | 24,542,665  | rs116303850 | T | A   | 5p12          | 7.89  |
| 19 | 24,547,764  | rs113495644 | C | T   | 5p12          | 6.84  |
| 19 | 24,551,282  | rs79259956  | A | G   | 5p13.1        | 6.07  |
| 19 | 24,560,439  | rs12185488  | G | A   | 5q11.1        | 8.88  |

|    |            |             |   |   |          |       |
|----|------------|-------------|---|---|----------|-------|
| 19 | 24,569,499 | rs113670433 | G | T | 5p12     | 7.63  |
| 19 | 24,572,013 | rs9797568   | T | G | 5q11.1   | 6.44  |
| 19 | 24,574,640 | NA          | T | C | 5p12     | 6.01  |
| 19 | 24,580,487 | NA          | A | G | 5p13.1   | 6.05  |
| 19 | 24,591,027 | NA          | A | G | 5p12     | 6.14  |
| 19 | 27,844,007 | NA          | T | A | 5p12     | 7.8   |
| 19 | 27,848,902 | NA          | A | T | 5p12     | 7.1   |
| 19 | 27,853,295 | rs111968850 | C | T | 5q11.2   | 8.05  |
| 19 | 27,853,380 | rs7339606   | G | A | 5p12     | 7.62  |
| 19 | 27,855,789 | NA          | T | C | 5p12     | 8.33  |
| 19 | 27,858,186 | NA          | C | T | 5p12     | 7.07  |
| 19 | 27,859,120 | NA          | G | T | 5q11.1   | 6.11  |
| 19 | 27,874,538 | NA          | G | A | 5q11.2   | 7.42  |
| 19 | 27,878,359 | rs113069608 | T | C | 5p12     | 7.62  |
| 20 | 25,735,451 | rs62213479  | A | G | 2q14.2   | 6.23  |
| 21 | 10,645,052 | NA          | C | T | 14q11.2  | 6.01  |
| 21 | 10,782,834 | rs28782475  | G | A | 14q11.2  | 8.31  |
| 21 | 10,828,125 | rs28972812  | G | A | 13q12.11 | 6.5   |
| 21 | 10,833,278 | rs71318462  | G | A | 14q11.2  | 6.9   |
| 21 | 10,884,115 | rs62212672  | A | G | 14q11.2  | 6.95  |
| 21 | 10,908,767 | rs4913632   | C | T | 14q11.2  | 6.68  |
| 21 | 10,914,074 | rs11911842  | C | T | 14q11.2  | 8.04  |
| 21 | 11,025,892 | rs4481080   | C | A | 13q12.11 | 7.77  |
| 21 | 11,045,446 | rs10439794  | T | A | 13q12.11 | 6.79  |
| 21 | 11,045,651 | rs10439795  | G | A | 13q12.11 | 7.08  |
| 21 | 11,051,621 | rs60979296  | C | G | 13q12.11 | 6.31  |
| 21 | 11,052,182 | rs4913692   | C | T | 13q12.11 | 10.76 |
| 21 | 11,053,144 | rs4118184   | G | T | 14q11.2  | 6.28  |
| 21 | 11,081,096 | rs12185850  | G | A | 13q12.11 | 6.87  |
| 21 | 11,083,360 | NA          | T | G | 13q12.11 | 6.61  |
| 21 | 11,084,624 | rs10439754  | A | G | 13q12.11 | 6.66  |
| 21 | 11,092,473 | rs8128375   | C | T | 13q12.11 | 7.03  |
| 21 | 14,340,229 | NA          | A | G | 20q11.21 | 9.07  |
| 21 | 14,341,119 | NA          | G | T | 2p11.2   | 6.7   |
| 21 | 14,346,835 | rs9637142   | T | C | 13q12.11 | 6.89  |
| 21 | 14,360,978 | rs4461339   | G | A | 13q12.11 | 9.48  |
| 21 | 14,366,846 | rs112284104 | T | A | 2q21.2   | 9.2   |
| 21 | 14,367,055 | NA          | C | A | 2q21.2   | 8.68  |
| 21 | 14,375,493 | rs4816736   | C | T | 13q12.11 | 6.36  |
| 21 | 14,428,607 | rs4107467   | A | T | 13q11    | 7.09  |
| 22 | 18,881,292 | NA          | T | C | 12q24.32 | 6.06  |
